# Supplementary material for: Effects of self-hydrogen bonding among formamide molecules on the UCST-type liquid–liquid phase separation of binary solutions with imidazolium-based ionic liquid, [Cnmim][TFSI], studied by NMR, IR, MD simulations, and SANS
Source: Royal Society of Chemistry journal article supplement (doi:10.1039/d2cp01006b), 2022-01-01
Supplement: d2cp01006b1.pdf [file d2cp01006b1.pdf]

## Electronic Supplementary Information

# Effects of self-hydrogen bonding among formamide molecules on the UCST-type liquid–liquid phase separation of binary solutions with imidazolium-based ionic liquid, $[C_n\text{mim}][\text{TFSI}]$ , studied by NMR, IR, MD simulations, and SANS

Masahiro Kawano<sup>a</sup>, Atsuya Tashiro<sup>a</sup>, Yuki Imamura<sup>b</sup>, Moeno Yamada<sup>b</sup>, Koichiro Sadakane<sup>c</sup>, Hiroki Iwase<sup>d</sup>, Masaru Matsugami<sup>e</sup>, Bogdan A. Marekha<sup>f</sup>, Abdenacer Idrissi<sup>g</sup>, and Toshiyuki Takamuku<sup>b,\*</sup>

<sup>a</sup> *Department of Chemistry and Applied Chemistry, Graduate School of Science and Engineering, Saga University, Honjo-machi, Saga 840-8502, Japan*

<sup>b</sup> *Department of Chemistry and Applied Chemistry, Faculty of Science and Engineering, Saga University, Honjo-machi, Saga 840-8502, Japan*

<sup>c</sup> *Faculty of Life and Medical Sciences, Doshisha University, 1-3 Tatara Miyakodani, Kyotanabe, Kyoto 610-0394, Japan*

<sup>d</sup> *Comprehensive Research Organization for Science and Society (CROSS), 162-1 Shirakata, Tokai, Ibaraki 319-1106, Japan*

<sup>e</sup> *Faculty of Liberal Arts, National Institute of Technology (KOSEN), Kumamoto College, 2659-2 Suya, Koshi, Kumamoto 861-1102, Japan*

<sup>f</sup> *Department of Biomolecular Mechanisms, Max Planck Institute for Medical Research, 29 Jahnstr., 69230 Heidelberg, Germany*

<sup>g</sup> *University of Lille, CNRS, UMR 8516 -LASIRE- Laboratoire Avancé de Spectroscopie pour les Interactions la Réactivité et l'environnement, F-59000 Lille, France*

\*Corresponding Author

Toshiyuki Takamuku

E-mail: takamut@cc.saga-u.ac.jp

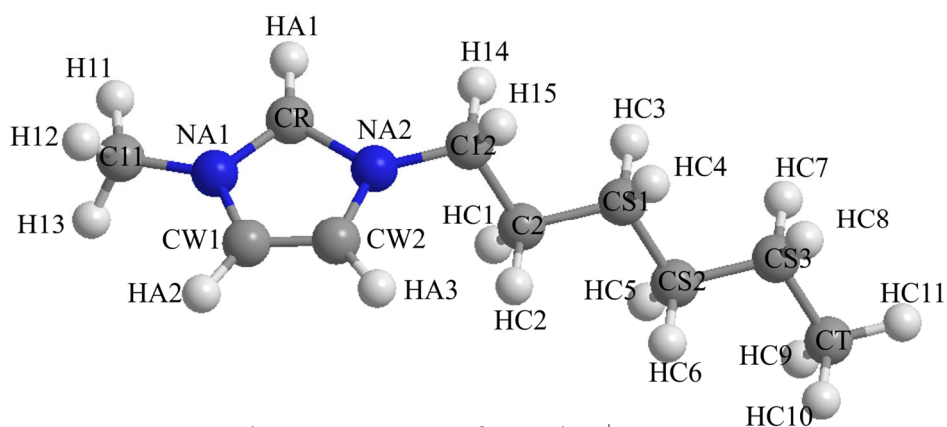

Fig. S1 Structure of  $[\text{C}_6\text{mim}]^+$ .

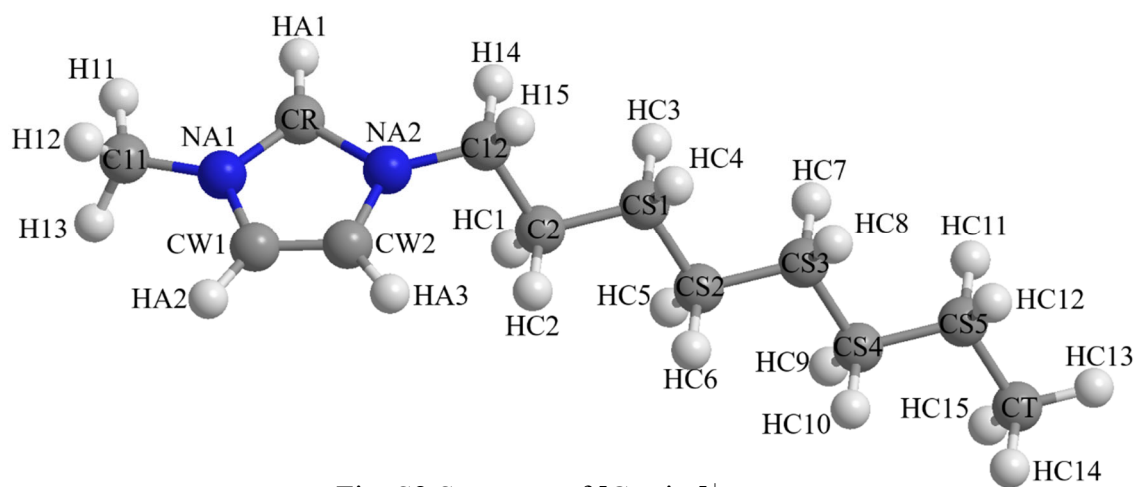

Fig. S2 Structure of  $[\text{C}_8\text{mim}]^+$ .

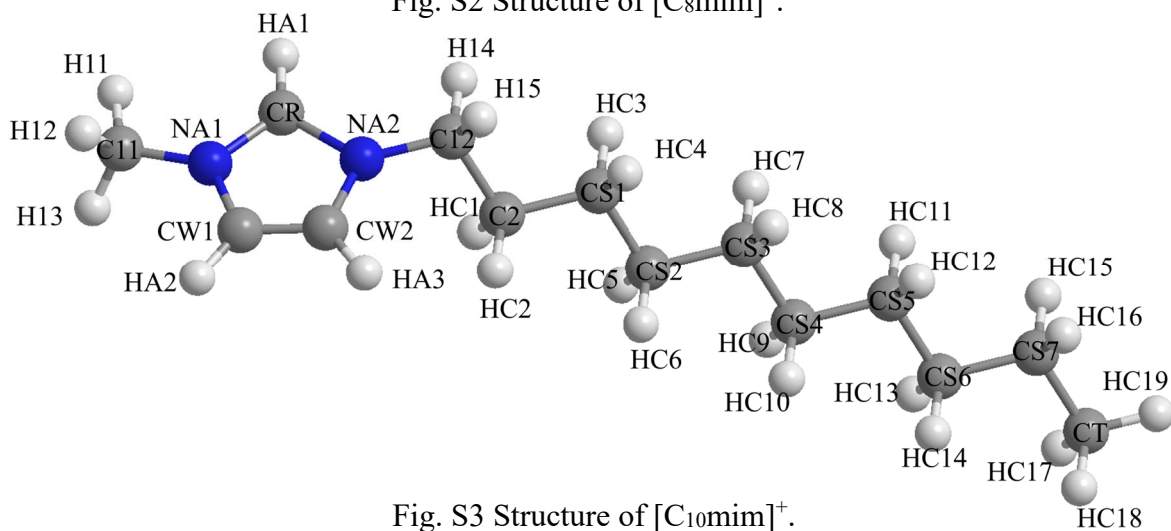

Fig. S3 Structure of  $[\text{C}_{10}\text{mim}]^+$ .

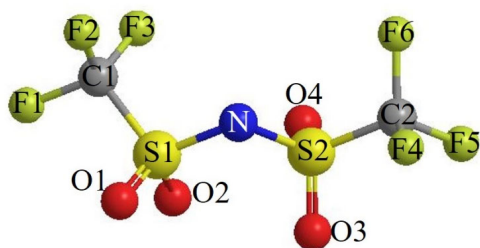

Fig. S4 Structure of  $[\text{TFSI}]^-$ .

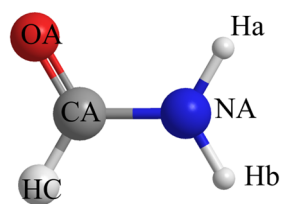

Fig. S5 Structure of FA.

Table S1 Atomic parameters for  $[C_n\text{mim}][\text{TFSI}]$  ( $n = 6, 8$ , and 10) and FA.

|                     | Atom | Charge / $e$ | $\sigma / \text{\AA}$ | $\varepsilon / \text{kcal mol}^{-1}$ |
|---------------------|------|--------------|-----------------------|--------------------------------------|
| $[C_n\text{mim}]^+$ | NA*  | 0.150        | 3.250                 | 0.170                                |
|                     | CR   | -0.110       | 3.550                 | 0.070                                |
|                     | HA*  | 0.210        | 2.420                 | 0.030                                |
|                     | CW*  | -0.130       | 3.550                 | 0.070                                |
|                     | C1*  | -0.170       | 3.500                 | 0.066                                |
|                     | H1*  | 0.130        | 2.500                 | 0.030                                |
|                     | C2   | 0.010        | 3.500                 | 0.066                                |
|                     | HC*  | 0.060        | 2.500                 | 0.030                                |
|                     | CS*  | -0.120       | 3.500                 | 0.066                                |
|                     | CT   | -0.180       | 3.500                 | 0.066                                |
| $[\text{TFSI}]^-$   | N    | -0.660       | 3.250                 | 0.170                                |
|                     | S*   | 1.020        | 3.550                 | 0.250                                |
|                     | C*   | 0.350        | 3.500                 | 0.066                                |
|                     | O*   | -0.530       | 2.960                 | 0.210                                |
|                     | F*   | -0.160       | 2.950                 | 0.053                                |
| FA                  | CA   | 0.140        | 3.806                 | 0.074                                |
|                     | HC   | 0.175        | 2.456                 | 0.011                                |
|                     | NA   | -0.416       | 3.299                 | 0.119                                |
|                     | Ha   | 0.317        | 0.000                 | 0.000                                |
|                     | Hb   | 0.312        | 0.000                 | 0.000                                |
|                     | OA   | -0.528       | 3.004                 | 0.147                                |

X\* means chemically equivalent X atoms in  $[C_n\text{mim}]^+$  and  $[\text{TFSI}]^-$  as depicted in Fig. S1–S4.

Table S2 Bond stretching parameters for  $[C_n\text{mim}][\text{TFSI}]$  ( $n = 6, 8$ , and 10) and FA.

|                     | Bond    | $r / \text{\AA}$ | $k / \text{kcal mol}^{-1}$ |
|---------------------|---------|------------------|----------------------------|
| $[C_n\text{mim}]^+$ | CR-NA*  | 1.315            | 477.0                      |
|                     | C1*-H1* | 1.090            |                            |
|                     | NA*-C1* | 1.466            | 337.0                      |
|                     | CR-HA*  | 1.080            |                            |
|                     | CW*-NA* | 1.378            | 427.0                      |
|                     | CW*-CW* | 1.341            | 520.0                      |
|                     | CW1-HA* | 1.080            |                            |
|                     | C1*-C2  | 1.529            | 268.0                      |
|                     | C2-HC*  | 1.090            |                            |
|                     | C2-CS*  | 1.529            | 268.0                      |
|                     | CS1-HC* | 1.090            |                            |
|                     | CS*-CS* | 1.529            | 268.0                      |
|                     | CS*-CT  | 1.529            | 268.0                      |
|                     | CT-HC*  | 1.090            |                            |
| $[\text{TFSI}]^-$   | N-S*    | 1.570            | 374.7                      |
|                     | S*-C*   | 1.818            | 232.9                      |
|                     | S*-O*   | 1.437            | 636.8                      |

|    |       |       |       |
|----|-------|-------|-------|
|    | C*-F* | 1.323 | 441.7 |
| FA | CA-NA | 1.333 | 268.0 |
|    | CA-OA | 1.229 | 340.0 |
|    | CA-HC | 1.098 |       |
|    | NA-Ha | 1.012 |       |
|    | NA-Hb | 1.012 |       |

X\* means chemically equivalent X atoms in  $[C_n\text{mim}]^+$  and  $[\text{TFSI}]^-$  as depicted in Fig. S1–S4.

Table S3 Angle bending parameters for  $[C_n\text{mim}][\text{TFSI}]$  ( $n = 6, 8$ , and  $10$ ) and FA.

|                     | Angle       | $K / \text{kcal mol}^{-1} \text{ degree}^{-2}$ | $\theta / \text{degree}$ |
|---------------------|-------------|------------------------------------------------|--------------------------|
| $[C_n\text{mim}]^+$ | H1*-C1*-H1* | 33.00                                          | 107.8                    |
|                     | H1*-C1*-NA* | 37.50                                          | 110.7                    |
|                     | C1*-NA*-CR  | 70.00                                          | 126.4                    |
|                     | C1*-NA*-CW* | 70.00                                          | 125.6                    |
|                     | NA*-CR-HA*  | 35.00                                          | 125.1                    |
|                     | NA*-CR-NA*  | 70.00                                          | 109.8                    |
|                     | CR-NA*-CW*  | 70.00                                          | 108.0                    |
|                     | NA*-CW*-CW* | 70.00                                          | 107.1                    |
|                     | NA*-CW*-HA* | 35.00                                          | 122.0                    |
|                     | HA*-CW*-CW* | 35.00                                          | 130.9                    |
|                     | NA*-C1*-C2  | 58.30                                          | 112.7                    |
|                     | H1*-C1*-C2  | 37.50                                          | 110.7                    |
|                     | C1*-C2-HC*  | 37.50                                          | 110.7                    |
|                     | C1*-C2-CS*  | 58.30                                          | 112.7                    |
|                     | HC*-C2-CS*  | 37.50                                          | 110.7                    |
|                     | HC*-CS*-C2  | 37.50                                          | 110.7                    |
|                     | HC*-CS*-CS* | 37.50                                          | 110.7                    |
|                     | HC*-CS*-CT  | 37.50                                          | 110.7                    |
|                     | HC*-CT-CS*  | 37.50                                          | 110.7                    |
|                     | HC*-CT-HC*  | 33.00                                          | 107.8                    |
|                     | HC*-C2-HC*  | 33.00                                          | 107.8                    |
|                     | HC*-CS*-HC* | 33.00                                          | 107.8                    |
|                     | C2-CS*-CS*  | 58.30                                          | 112.7                    |
|                     | CS*-CS*-CS* | 58.30                                          | 112.7                    |
|                     | CS*-CS*-CT  | 58.30                                          | 112.7                    |
| $[\text{TFSI}]^-$   | N-S*-C*     | 91.30                                          | 103.5                    |
|                     | N-S*-O*     | 94.20                                          | 113.6                    |
|                     | S*-N-S*     | 80.10                                          | 125.6                    |
|                     | S*-C*-F*    | 82.90                                          | 111.7                    |
|                     | C*-S*-O*    | 103.90                                         | 102.6                    |
|                     | O*-S*-O*    | 115.70                                         | 118.5                    |
|                     | F*-C*-F*    | 93.30                                          | 107.1                    |
| FA                  | OA-CA-NA    | 80.00                                          | 124.6                    |
|                     | HC-CA-NA    | 40.00                                          | 113.8                    |
|                     | CA-NA-Ha    | 35.00                                          | 119.1                    |

|          |       |       |
|----------|-------|-------|
| CA-NA-Hb | 35.00 | 119.1 |
| HC-CA-OA | 35.00 | 120.4 |
| Hb-NA-Ha | 35.00 | 120.6 |

X\* means chemically equivalent X atoms in  $[C_n\text{mim}]^+$  and  $[\text{TFSI}]^-$  as depicted in Fig. S1–S4.

Table S4 Dihedral parameters for  $[C_n\text{mim}][\text{TFSI}]$  ( $n = 6, 8$ , and 10) and FA.

|                     | Dihedral        | $V_1 / \text{kcal mol}^{-1}$ | $V_2 / \text{kcal mol}^{-1}$ | $V_3 / \text{kcal mol}^{-1}$ | $V_4 / \text{kcal mol}^{-1}$ |
|---------------------|-----------------|------------------------------|------------------------------|------------------------------|------------------------------|
| $[C_n\text{mim}]^+$ | CR-NA*-C1*-H1*  | 0.000                        | 0.000                        | 0.000                        | 0.000                        |
|                     | CW*-NA*-C1*-H1* | 0.000                        | 0.000                        | 0.124                        | 0.000                        |
|                     | C1*-NA*-CR-HA*  | 0.000                        | 4.650                        | 0.000                        | 0.000                        |
|                     | NA*-CR-NA*-C1*  | 0.000                        | 4.650                        | 0.000                        | 0.000                        |
|                     | CW*-CW*-NA-C1*  | 0.000                        | 3.000                        | 0.000                        | 0.000                        |
|                     | C1*-NA*-CW*-HA* | 0.000                        | 3.000                        | 0.000                        | 0.000                        |
|                     | NA*-CW*-CW*-HA* | 0.000                        | 10.750                       | 0.000                        | 0.000                        |
|                     | NA*-CW*-CW*-NA* | 0.000                        | 10.750                       | 0.000                        | 0.000                        |
|                     | CW*-NA*-CR-HA*  | 0.000                        | 4.650                        | 0.000                        | 0.000                        |
|                     | CR-NA*-CW*-HA*  | 0.000                        | 3.000                        | 0.000                        | 0.000                        |
|                     | CR-NA*-CW*-CW*  | 0.000                        | 3.000                        | 0.000                        | 0.000                        |
|                     | C1*-C2-CS*-HC*  | 0.000                        | 0.000                        | 0.366                        | 0.000                        |
|                     | HC*-C2-CS*-HC*  | 0.000                        | 0.000                        | 0.318                        | 0.000                        |
|                     | HC*-CS*-CS*-HC* | 0.000                        | 0.000                        | 0.318                        | 0.000                        |
|                     | HC*-CS*-CT-HC*  | 0.000                        | 0.000                        | 0.318                        | 0.000                        |
|                     | HC*-CS*-CS*-CT  | 0.000                        | 0.000                        | 0.366                        | 0.000                        |
|                     | C1*-C2-CS*-CS*  | 1.739                        | -0.157                       | 0.279                        | 0.000                        |
|                     | C2-CS*-CS*-CS*  | 1.739                        | -0.157                       | 0.279                        | 0.000                        |
|                     | CS*-CS*-CS*-CS* | 1.739                        | -0.157                       | 0.279                        | 0.000                        |
|                     | CS*-CS*-CS*-CT  | 1.739                        | -0.157                       | 0.279                        | 0.000                        |
|                     | CS*-CS*-CS*-HC* | 0.000                        | 0.000                        | 0.366                        | 0.000                        |
|                     | C2-CS*-CS*-HC*  | 0.000                        | 0.000                        | 0.366                        | 0.000                        |
|                     | CS*-CS*-C2-HC*  | 0.000                        | 0.000                        | 0.366                        | 0.000                        |
|                     | CS*-CS*-CT-HC*  | 0.000                        | 0.000                        | 0.366                        | 0.000                        |
|                     | HA*-CW*-CW*-HA* | 0.000                        | 10.750                       | 0.000                        | 0.000                        |
|                     | CW*-NA*-C1*-C2  | -1.709                       | 1.459                        | 0.190                        | 0.000                        |
|                     | CR-NA*-C1*-C2   | -1.259                       | 0.000                        | 0.000                        | 0.000                        |
|                     | NA*-C1*-C2-CS*  | -1.787                       | 0.756                        | -0.287                       | 0.000                        |
|                     | H1*-C1*-C2-HC*  | 0.000                        | 0.000                        | 0.318                        | 0.000                        |
|                     | NA*-C1*-C2-HC*  | 0.000                        | 0.000                        | 0.088                        | 0.000                        |
|                     | CS*-C2-C1*-H1*  | 0.000                        | 0.000                        | 0.366                        | 0.000                        |
|                     | NA*-CR-NA*-CW*  | 0.000                        | 4.650                        | 0.000                        | 0.000                        |
| $[\text{TFSI}]^-$   | N-S*-C*-F*      | 0.000                        | 0.000                        | 0.316                        | 0.000                        |
|                     | S*-N-S*-C*      | 7.829                        | -2.489                       | -0.763                       | 0.000                        |
|                     | S*-N-S*-O*      | 0.000                        | 0.000                        | -0.003                       | 0.000                        |
|                     | O*-S*-C*-F*     | 0.000                        | 0.000                        | 0.347                        | 0.000                        |
| FA                  | OA-CA-NA-Ha     | 0.000                        | 4.900                        | 0.450                        | 0.000                        |
|                     | OA-CA-NA-Hb     | 0.000                        | 4.900                        | 0.450                        | 0.000                        |
|                     | HC-CA-NA-Ha     | 0.000                        | 4.900                        | 0.450                        | 0.000                        |

|             |       |       |       |       |
|-------------|-------|-------|-------|-------|
| HC-CA-NA-Hb | 0.000 | 4.900 | 0.450 | 0.000 |
|-------------|-------|-------|-------|-------|

X\* means chemically equivalent X atoms in  $[C_n\text{mim}]^+$  and  $[\text{TFSI}]^-$  as depicted in Fig. S1–S4.

Table S5 Densities of  $d_{\text{MD}}$  derived from MD simulations and  $d_{\text{exp}}$  experimentally determined, and the deviation of  $\Delta d$ , respectively.

| [C <sub>6</sub> mim][TFSI]–FA system  |                |                                    |                                     |                 | [C <sub>8</sub> mim][TFSI]–FA system  |                |                                    |                                     |                 |
|---------------------------------------|----------------|------------------------------------|-------------------------------------|-----------------|---------------------------------------|----------------|------------------------------------|-------------------------------------|-----------------|
| $x_{\text{FA}}$                       | $T / \text{K}$ | $d_{\text{MD}} / \text{g cm}^{-3}$ | $d_{\text{exp}} / \text{g cm}^{-3}$ | $\Delta d / \%$ | $x_{\text{FA}}$                       | $T / \text{K}$ | $d_{\text{MD}} / \text{g cm}^{-3}$ | $d_{\text{exp}} / \text{g cm}^{-3}$ | $\Delta d / \%$ |
| 0                                     | 348.2          | 1.303                              | 1.327*                              | -1.8            | 0                                     | 373.2          | 1.241                              | 1.255*                              | -1.1            |
|                                       | 318.2          | 1.320                              | 1.354                               | -2.5            |                                       | 343.2          | 1.259                              | 1.281*                              | -1.8            |
|                                       | 298.2          | 1.331                              | 1.372                               | -3.0            |                                       | 323.2          | 1.270                              | 1.299                               | -2.2            |
|                                       | 278.2          | 1.343                              | 1.390*                              | -3.4            |                                       | 293.2          | 1.283                              | 1.316                               | -2.5            |
|                                       | 248.2          | 1.360                              |                                     |                 |                                       | 273.2          | 1.301                              | 1.343*                              | -3.1            |
| 0.881                                 | 348.2          | 1.222                              | 1.207*                              | 1.3             | 0.900                                 | 373.2          | 1.167                              | 1.154*                              | 1.2             |
|                                       | 318.2          | 1.250                              | 1.234                               | 1.2             |                                       | 343.2          | 1.194                              | 1.181*                              | 1.1             |
|                                       | 308.2          | 1.258                              | 1.244                               | 1.2             |                                       | 333.2          | 1.203                              | 1.190                               | 1.1             |
|                                       | 298.2          | 1.268                              | 1.253                               | 1.2             |                                       | 323.2          | 1.212                              | 1.199                               | 1.1             |
|                                       | 288.2          | 1.277                              | 1.262                               | 1.2             |                                       | 313.2          | 1.221                              | 1.208*                              | 1.0             |
|                                       | 278.2          | 1.286                              | 1.272*                              | 1.2             |                                       | 303.2          | 1.229                              | 1.217*                              | 1.0             |
|                                       | 248.2          | 1.310                              |                                     |                 |                                       | 273.2          | 1.257                              | 1.244*                              | 1.0             |
| [C <sub>10</sub> mim][TFSI]–FA system |                |                                    |                                     |                 | [C <sub>10</sub> mim][TFSI]–FA system |                |                                    |                                     |                 |
| $x_{\text{FA}}$                       | $T / \text{K}$ | $d_{\text{MD}} / \text{g cm}^{-3}$ | $d_{\text{exp}} / \text{g cm}^{-3}$ | $\Delta d / \%$ | $x_{\text{FA}}$                       | $T / \text{K}$ | $d_{\text{MD}} / \text{g cm}^{-3}$ | $d_{\text{exp}} / \text{g cm}^{-3}$ | $\Delta d / \%$ |
| 0                                     | 398.2          | 1.184                              | 1.194*                              | -0.85           | 0.926                                 | 348.2          | 1.158                              |                                     |                 |
|                                       | 368.2          | 1.203                              | 1.219*                              | -1.3            |                                       | 338.2          | 1.167                              |                                     |                 |
|                                       | 348.2          | 1.216                              | 1.236*                              | -1.6            |                                       | 328.2          | 1.175                              |                                     |                 |
|                                       | 328.2          | 1.229                              | 1.253                               | -2.0            |                                       | 298.2          | 1.202                              |                                     |                 |
|                                       | 298.2          | 1.247                              | 1.279                               | -2.5            |                                       |                |                                    |                                     |                 |
| 0.926                                 | 398.2          | 1.113                              |                                     |                 | 1                                     | 398.2          | 1.042                              | 1.045*                              | -0.32           |
|                                       | 368.2          | 1.140                              |                                     |                 |                                       | 348.2          | 1.083                              | 1.087*                              | -0.38           |
|                                       | 358.2          | 1.149                              |                                     |                 |                                       | 298.2          | 1.122                              | 1.129                               | -0.62           |
|                                       |                |                                    |                                     |                 |                                       | 248.2          | 1.160                              |                                     |                 |

\* The values were estimated by extrapolation for densities measured.

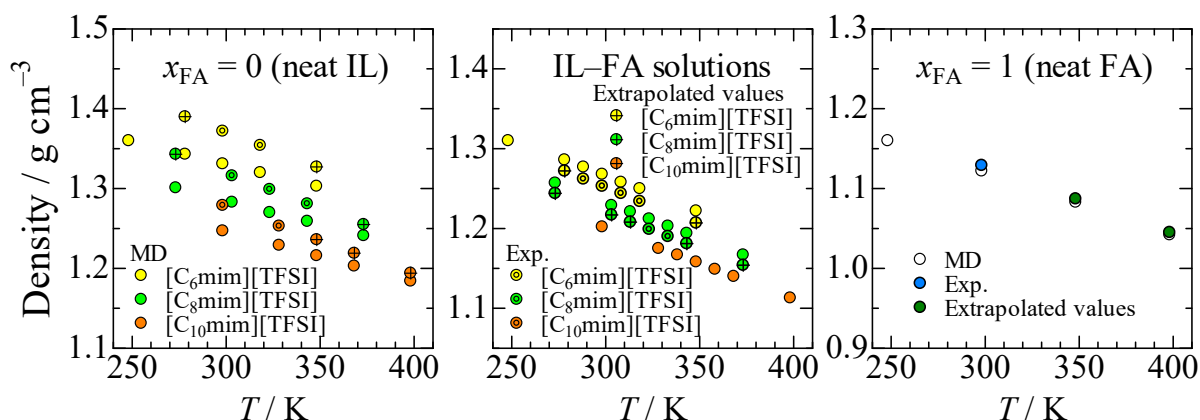

Fig. S6 Simulated and experimental densities for  $[C_n\text{mim}][\text{TFSI}]$ –FA system at  $x_{\text{FA}} = 0$  (neat IL) (left), UCST  $x_{\text{FA}} = 0.881$  ( $n = 6$ ),  $0.900$  ( $n = 8$ ), and  $0.926$  ( $n = 10$ ) (middle), and  $x_{\text{FA}} = 1$  (neat FA) (right), as a function of temperature.

Table S6 Phase separation points in the liquid–liquid phase diagrams of  $[C_n\text{mim}][\text{TFSI}]$ –FA and –FA- $d_2$  systems (Fig. 2 and S27, respectively).

| $n = 6$         |                | $n = 8$         |                | $n = 10$        |                | $n = 12$        |                | $n = 6$ (FA- $d_2$ ) |                |
|-----------------|----------------|-----------------|----------------|-----------------|----------------|-----------------|----------------|----------------------|----------------|
| $x_{\text{FA}}$ | $T / \text{K}$ | $x_{\text{FA-}d_2}$  | $T / \text{K}$ |
| 0.6043          | 279.0          | 0.4950          | 280.8          | 0.5063          | 300.4          | 0.4138          | 296.0          | 0.8005               | 294.2          |
| 0.7063          | 289.3          | 0.6130          | 298.2          | 0.6110          | 314.2          | 0.4992          | 312.3          | 0.8400               | 296.8          |
| 0.7488          | 292.8          | 0.7048          | 305.9          | 0.7016          | 330.3          | 0.5901          | 330.5          | 0.8810               | 295.7          |
| 0.8029          | 295.9          | 0.7532          | 314.3          | 0.7505          | 334.1          | 0.6487          | 338.1          | 0.9200               | 297.2          |
| 0.8511          | 297.2          | 0.7998          | 318.2          | 0.8033          | 343.3          | 0.7042          | 350.4          | 0.9500               | 290.1          |
| 0.8698          | 297.2          | 0.8188          | 319.3          | 0.8499          | 273.2          | 0.7517          | 360.0          |                      |                |
| 0.8812          | 297.3          | 0.8497          | 321.0          | 0.8694          | 345.7          | 0.9702          | 363.0          | $n = 8$ (FA- $d_2$ ) |                |
| 0.8902          | 297.3          | 0.8703          | 322.0          | 0.8905          | 346.0          | 0.9800          | 359.0          | $x_{\text{FA-}d_2}$  | $T / \text{K}$ |
| 0.8999          | 297.2          | 0.8995          | 322.1          | 0.9003          | 346.7          | 0.9898          | 338.8          | 0.8300               | 319.7          |
| 0.9125          | 297.2          | 0.9497          | 320.6          | 0.9209          | 346.9          |                 |                | 0.8764               | 322.0          |
| 0.9199          | 297.2          | 0.9698          | 313.5          | 0.9256          | 346.9          |                 |                | 0.9002               | 322.1          |
| 0.9301          | 296.6          |                 |                | 0.9303          | 346.9          |                 |                | 0.9301               | 321.1          |
| 0.9495          | 292.8          |                 |                | 0.9500          | 345.7          |                 |                |                      |                |
| 0.9702          | 279.4          |                 |                | 0.9770          | 335.0          |                 |                |                      |                |
|                 |                |                 |                | 0.9900          | 303.6          |                 |                |                      |                |

### S3.2 $^1\text{H}$ NMR peaks for the two amino H atoms of FA

Fig. S13, S15, S17, and S19 display  $^1\text{H}$  NMR spectra of neat FA and the  $[C_n\text{mim}][\text{TFSI}]$ –FA solutions with  $n = 6, 8$ , and  $10$ , respectively, as a function of temperature. At the lower temperatures below  $\sim 338.2$  K, two peaks for the amino H atoms separately appear around 8 ppm because the exchange rate of the two H atoms decreases with lowering temperature. The two peaks at the low and high magnetic fields can be assigned to the cis Ha and trans Hb atoms against the formyl O atom, respectively (see the notation of FA H atoms in Fig. 1 in the main text). However, the two peaks overlap as one broader peak at the higher temperatures above  $\sim 338.2$  K. In Fig. 9 of the main text, the values above 338.2 K correspond to the shifts for the peak where the signals of the Ha and Hb atoms overlap with each other.

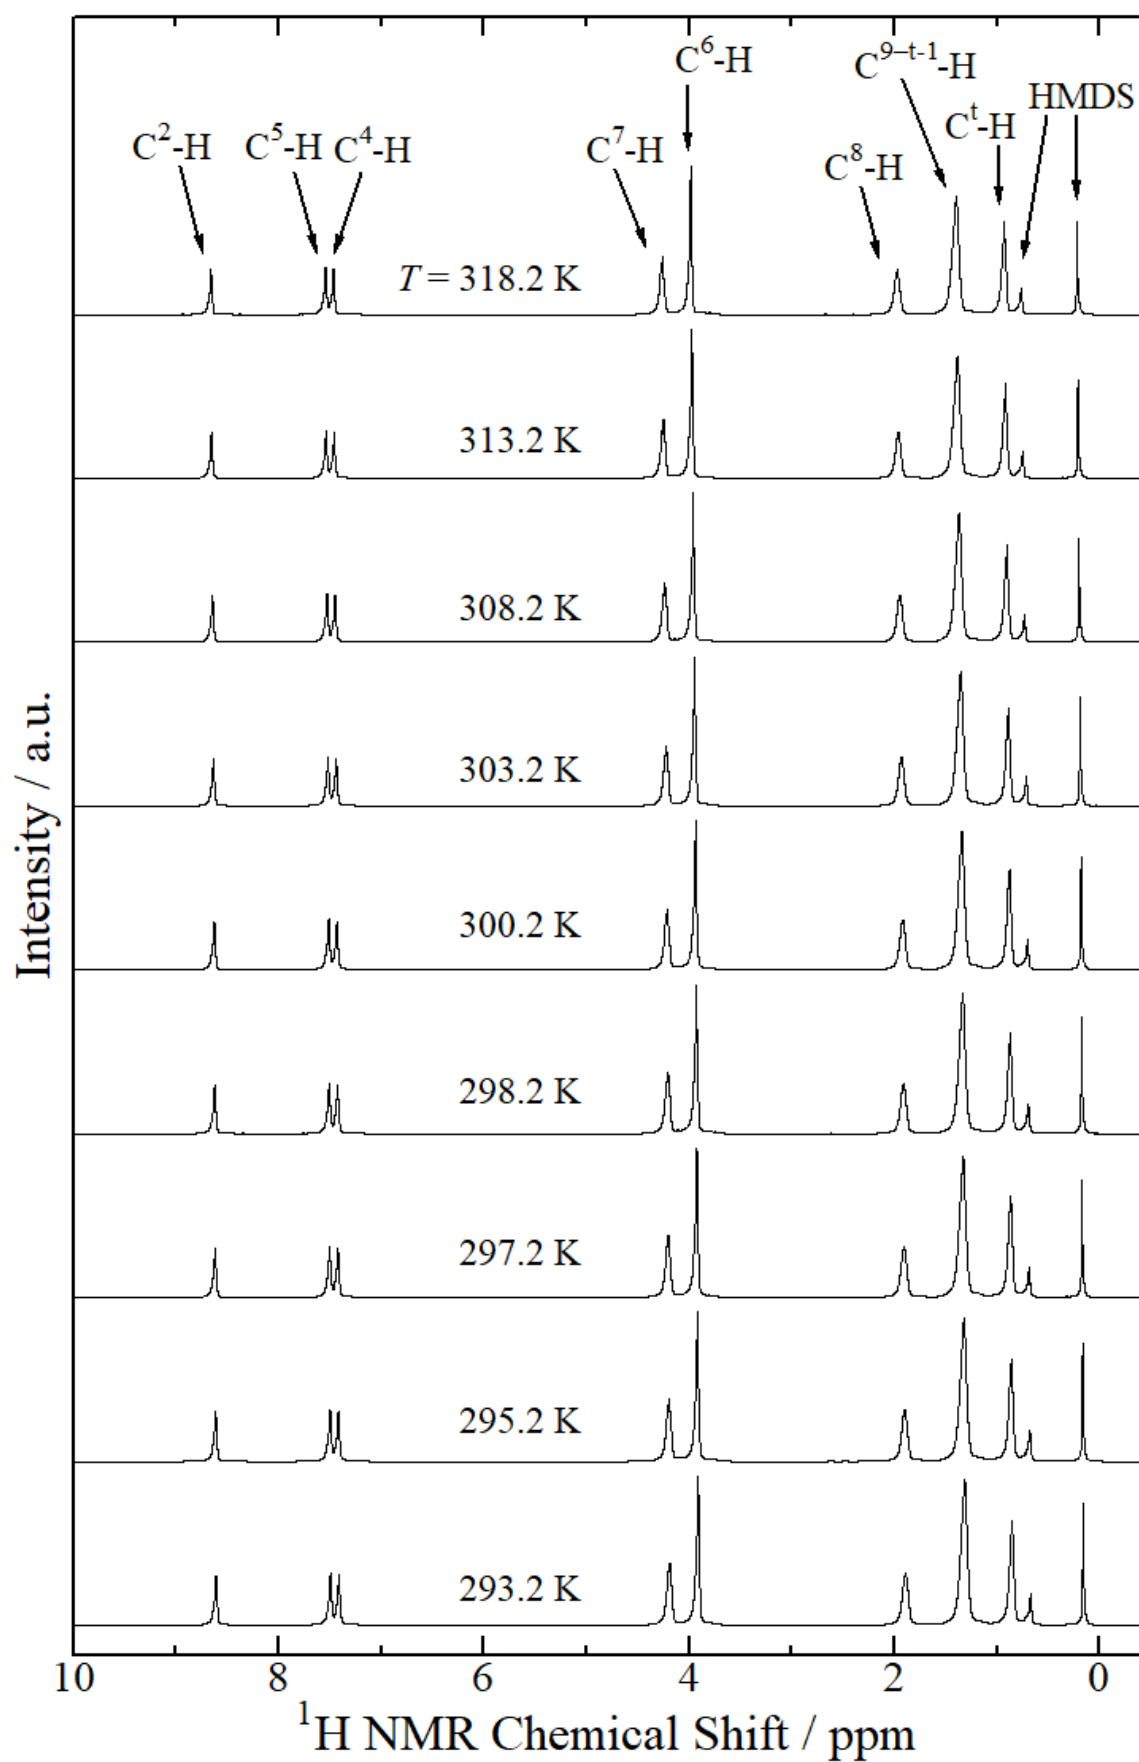

Fig. S7  $^1\text{H}$  NMR spectra of  $[\text{C}_6\text{mim}][\text{TFSI}]\text{-FA}$  system at  $x_{\text{FA}} = 0$  (neat IL) as a function of temperature from 318.2 to 293.2 K.



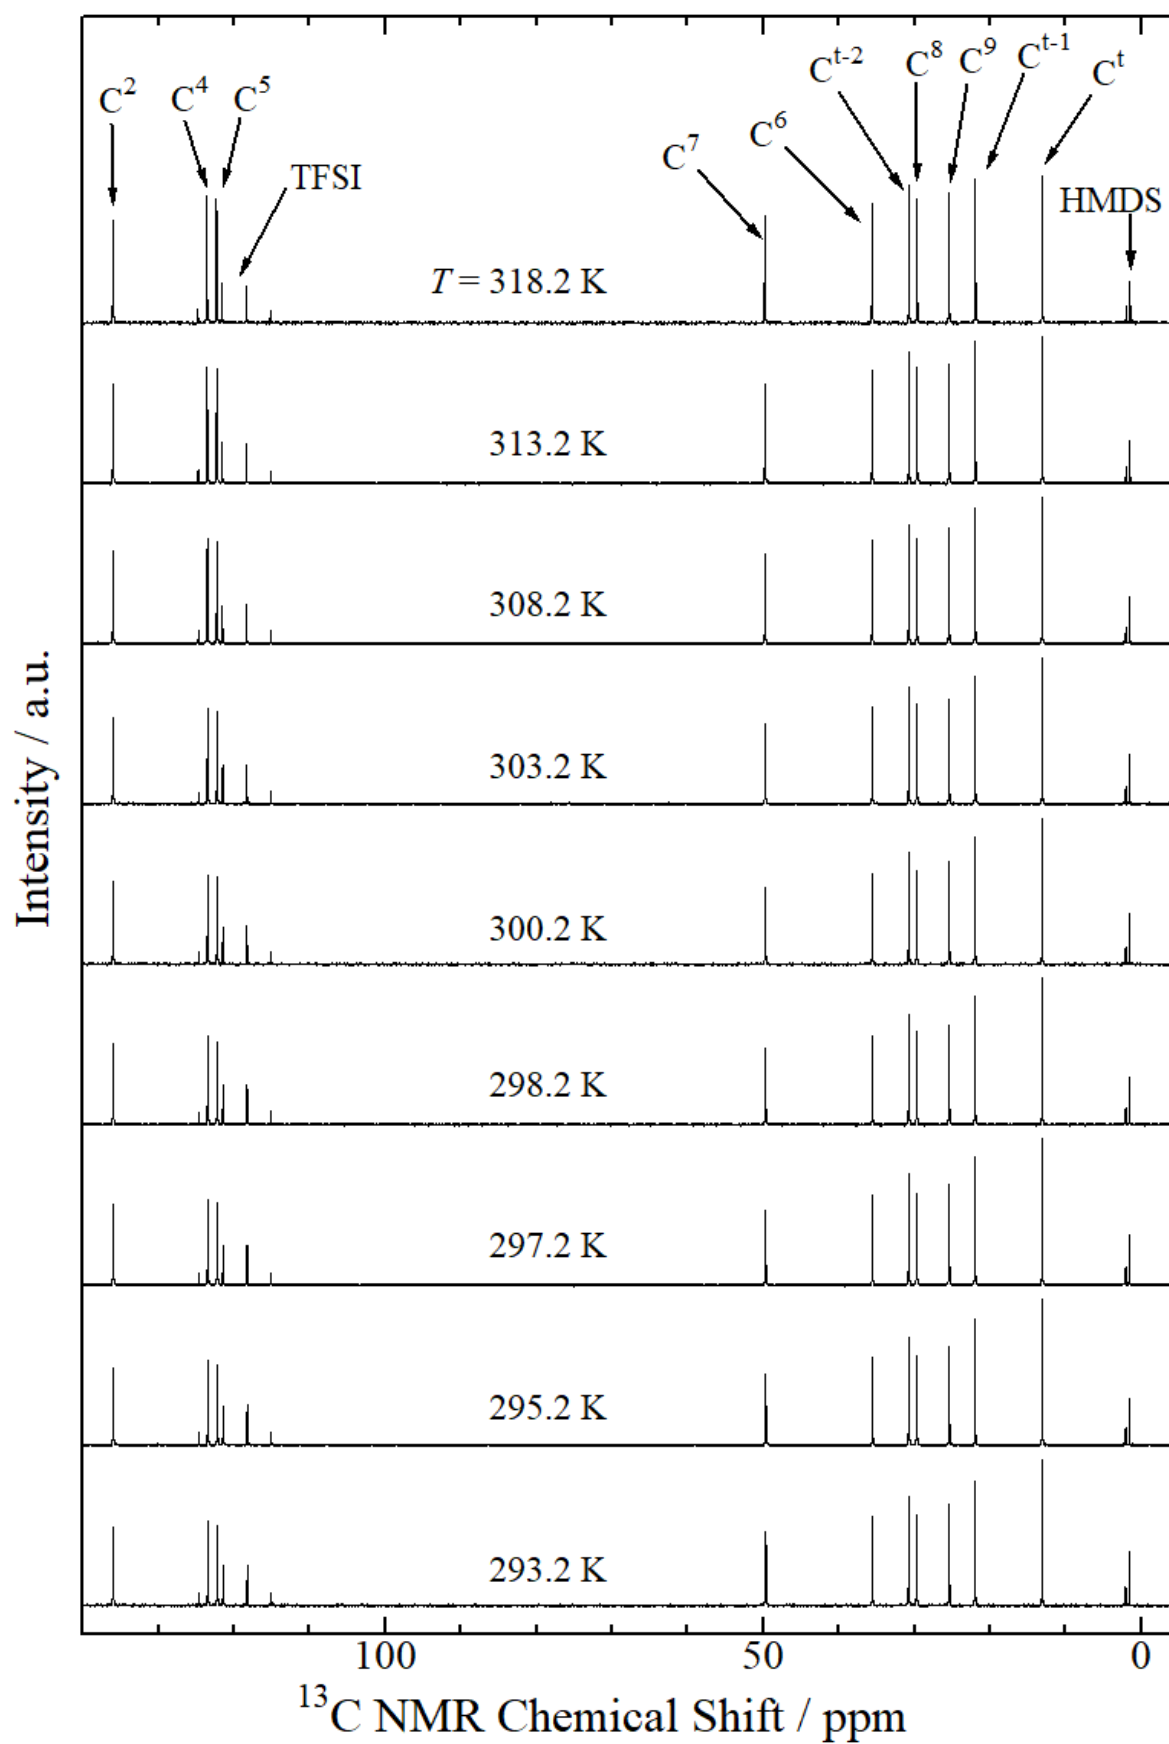

Fig. S8  $^{13}\text{C}$  NMR spectra of  $[\text{C}_6\text{mim}][\text{TFSI}]\text{-FA}$  system at  $x_{\text{FA}} = 0$  (neat IL) as a function of temperature from 318.2 to 293.2 K.

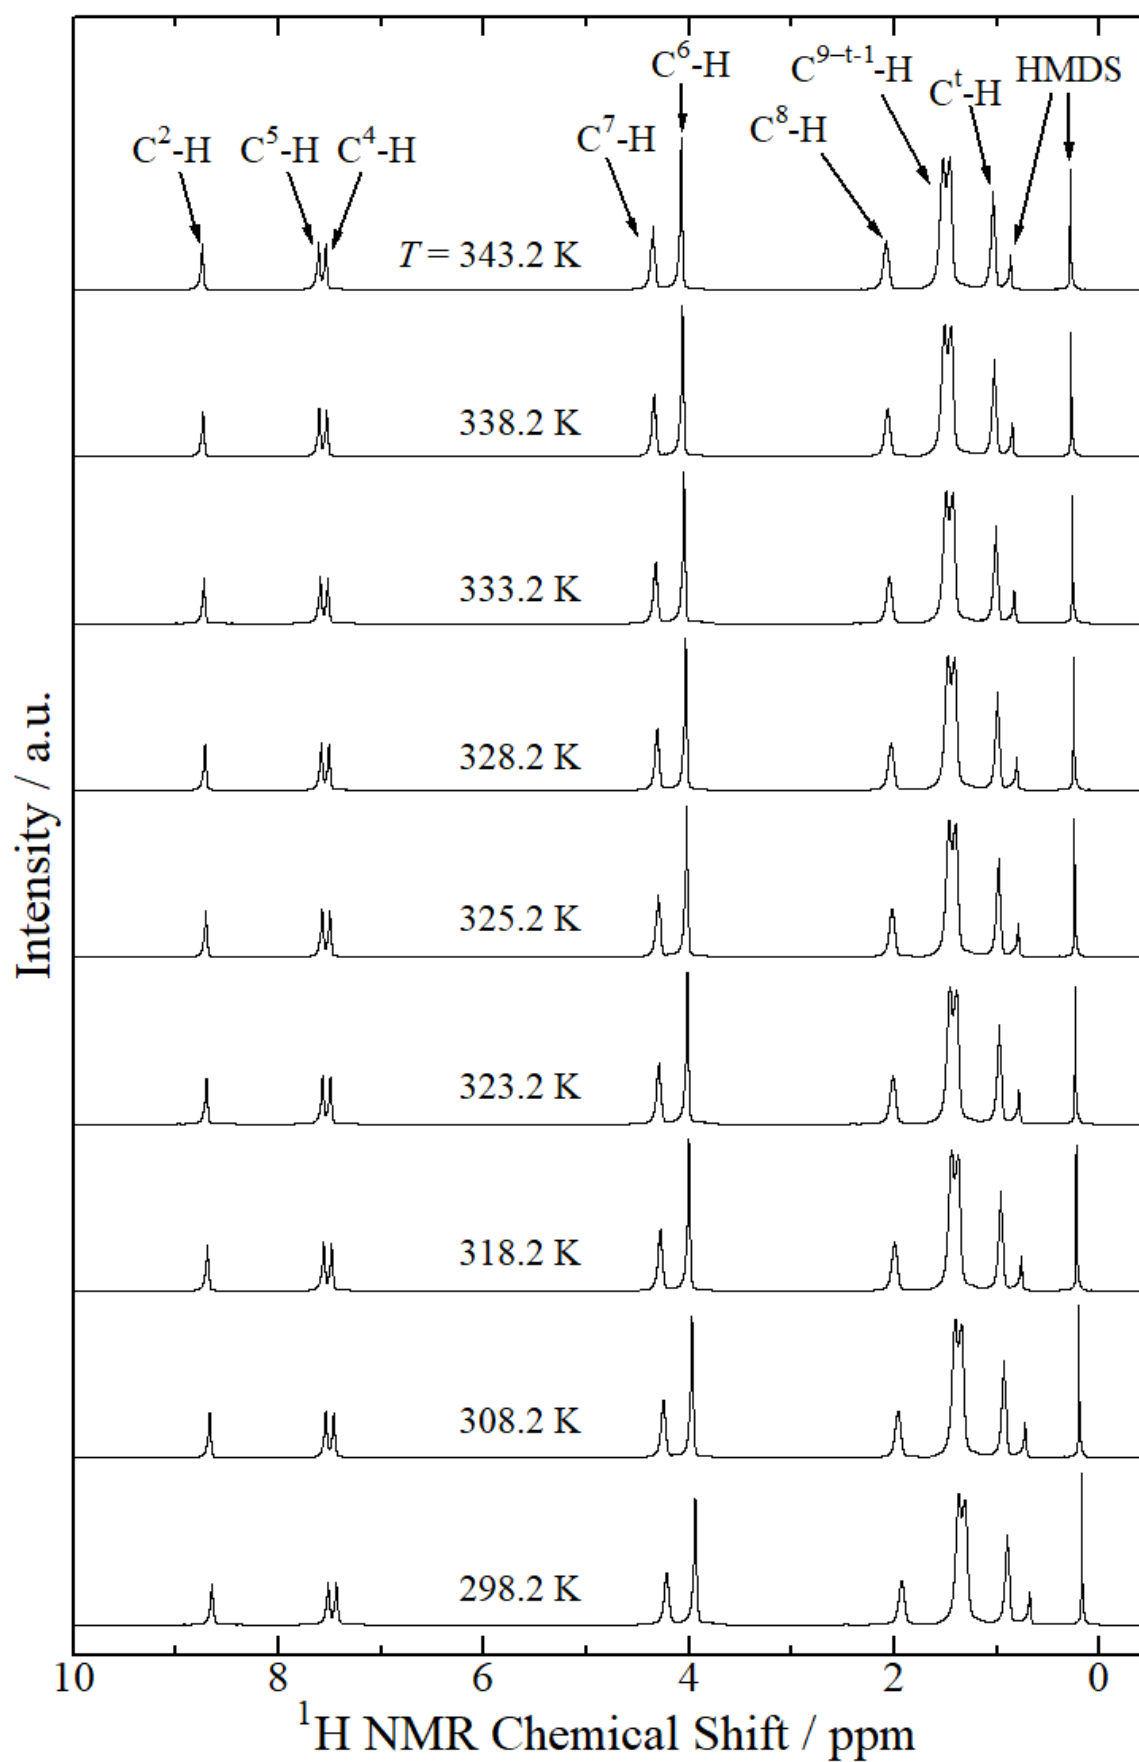

Fig. S9  $^1\text{H}$  NMR spectra of  $[\text{C}_8\text{mim}][\text{TFSI}]\text{-FA}$  system at  $x_{\text{FA}} = 0$  (neat IL) as a function of temperature from 343.2 to 298.2 K.

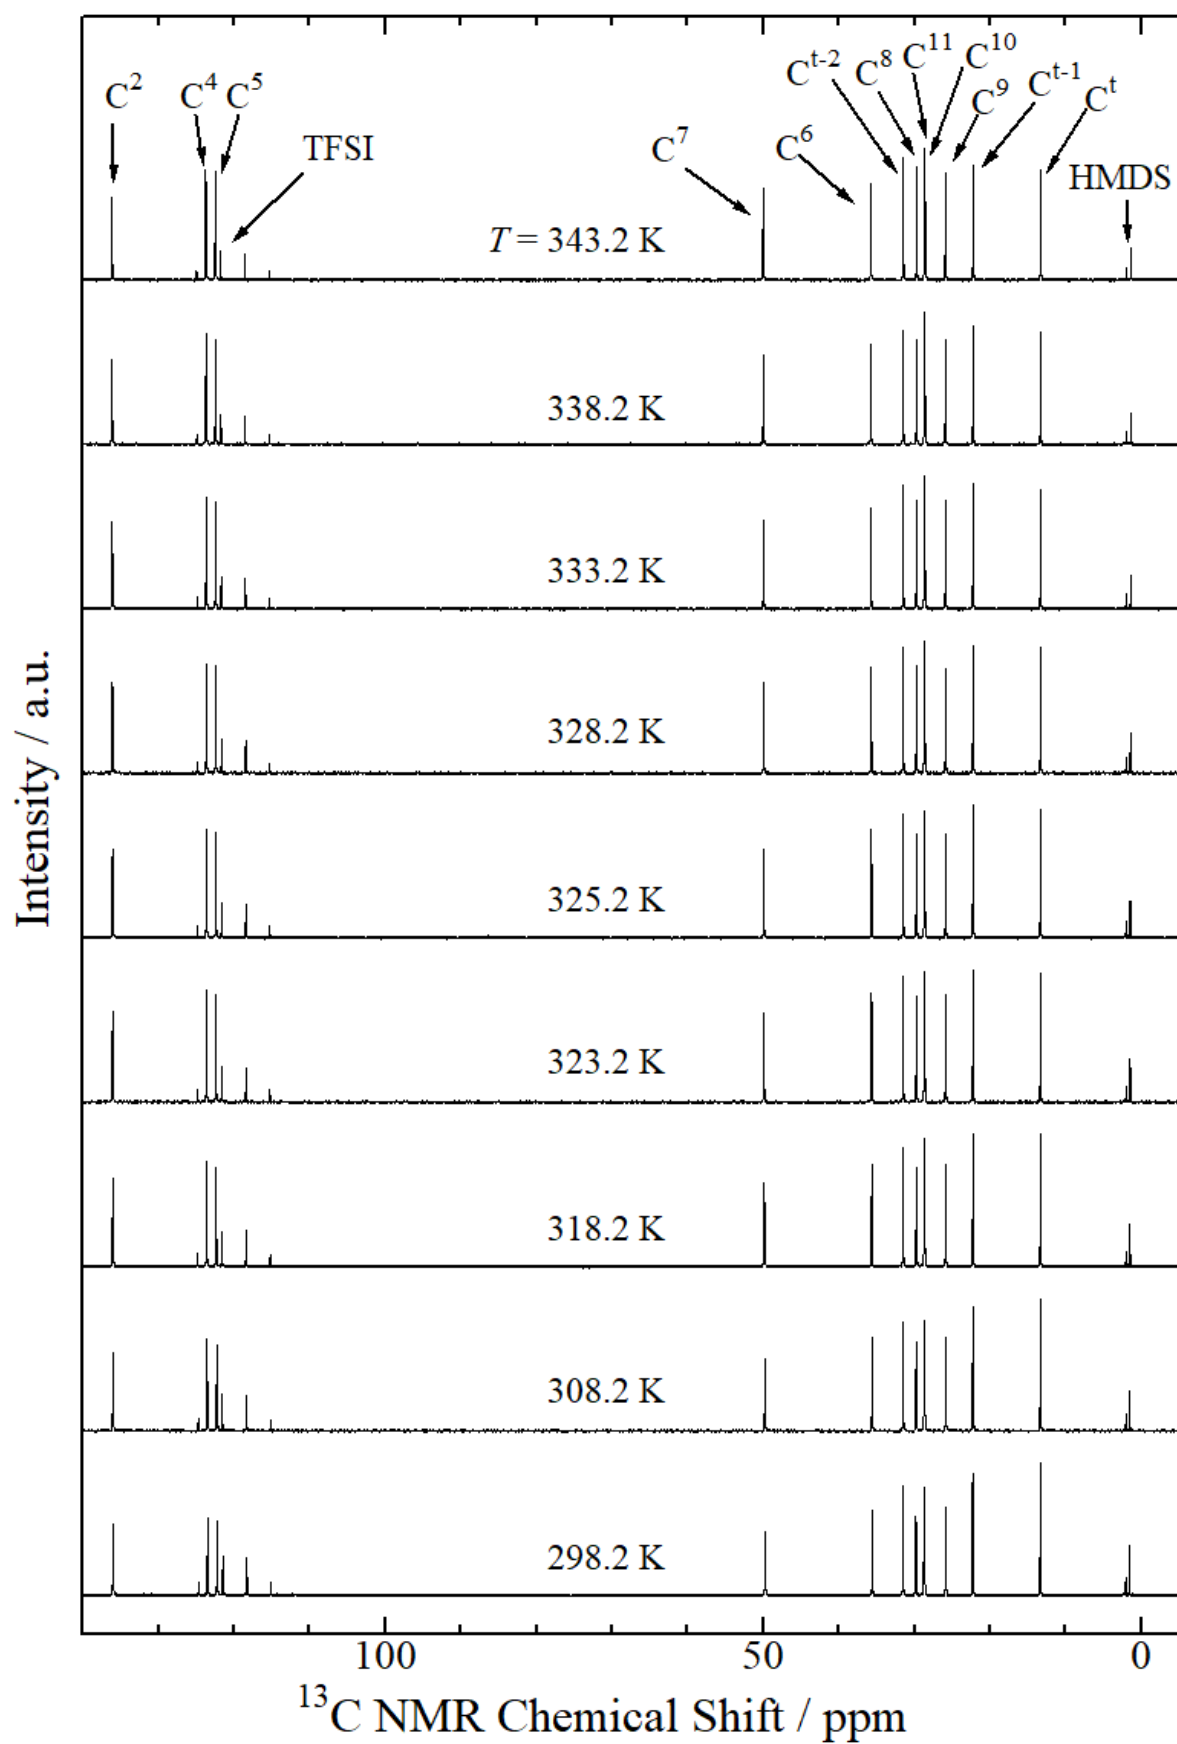

Fig. S10  $^{13}\text{C}$  NMR spectra of  $[\text{C}_8\text{mim}][\text{TFSI}]\text{-FA}$  system at  $x_{\text{FA}} = 0$  (neat IL) as a function of temperature from 343.2 to 298.2 K.

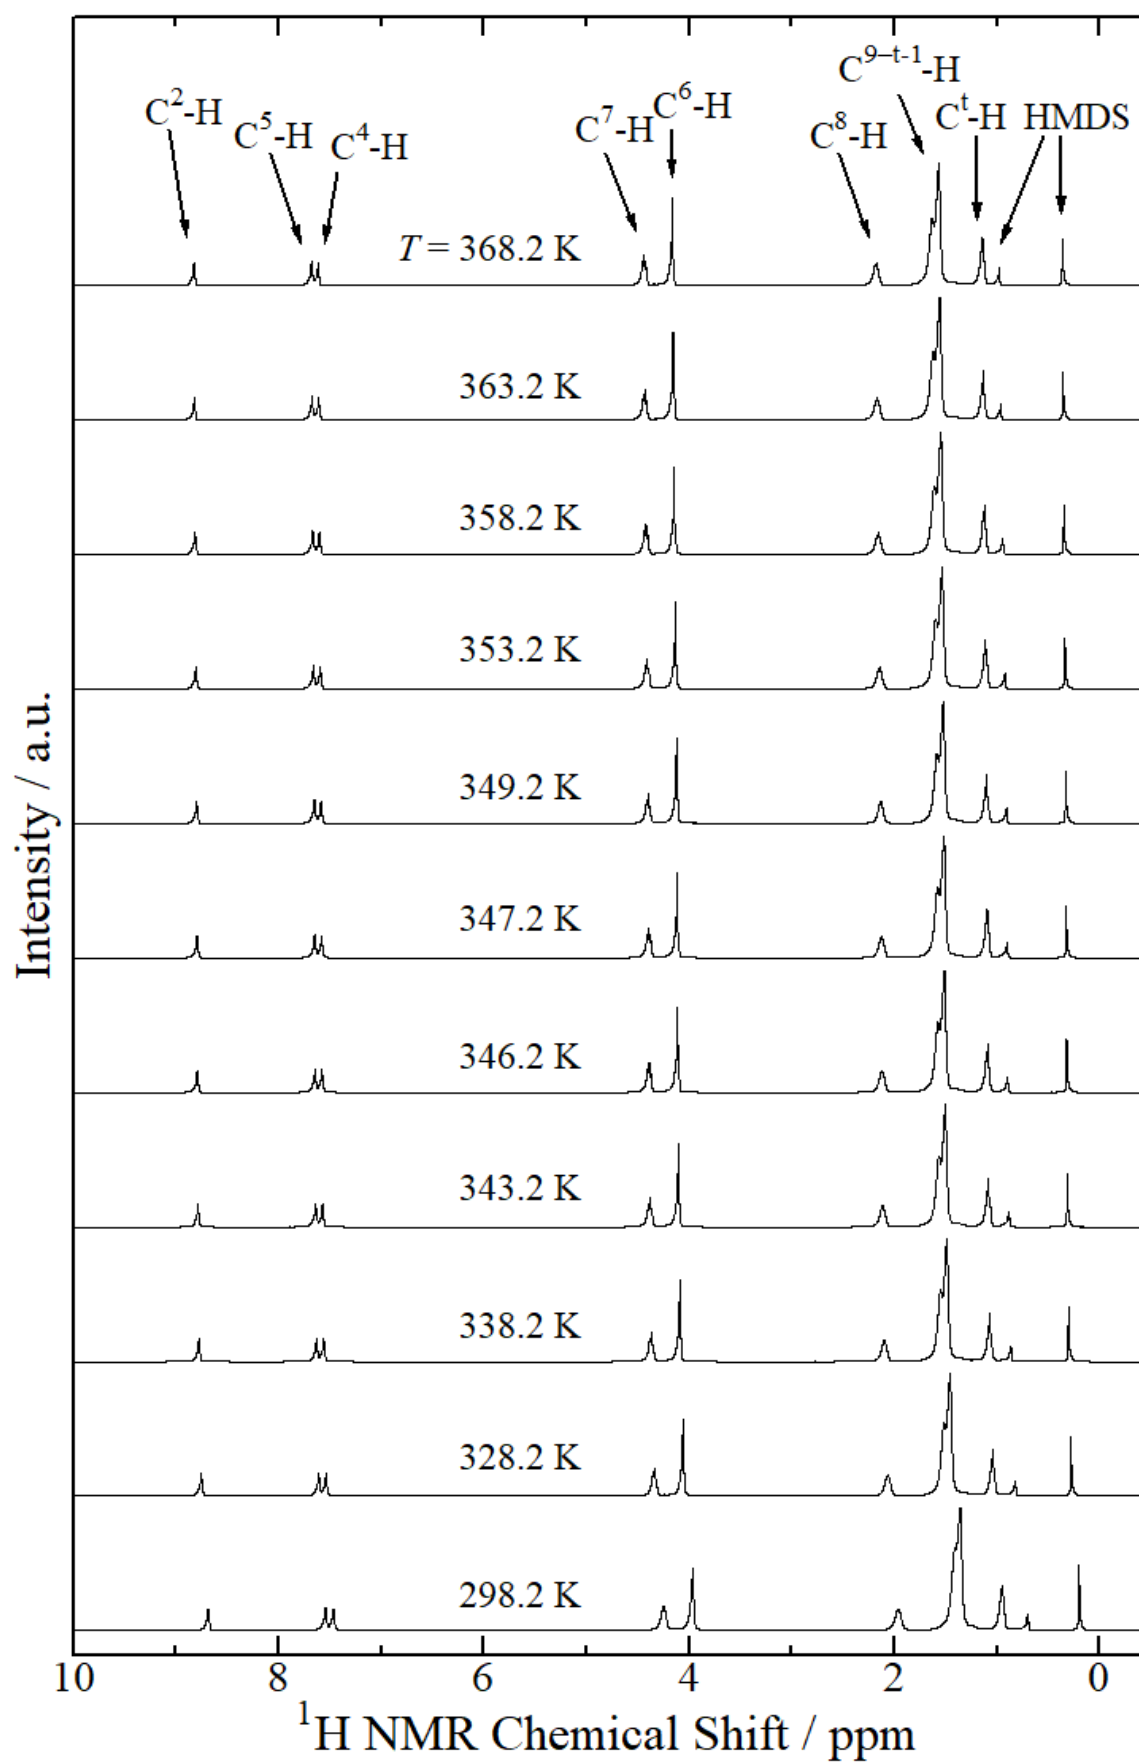

Fig. S11  $^1\text{H}$  NMR spectra of  $[\text{C}_{10}\text{mim}][\text{TFSI}]\text{-FA}$  system at  $x_{\text{FA}} = 0$  (neat IL) as a function of temperature from 368.2 to 298.2 K.

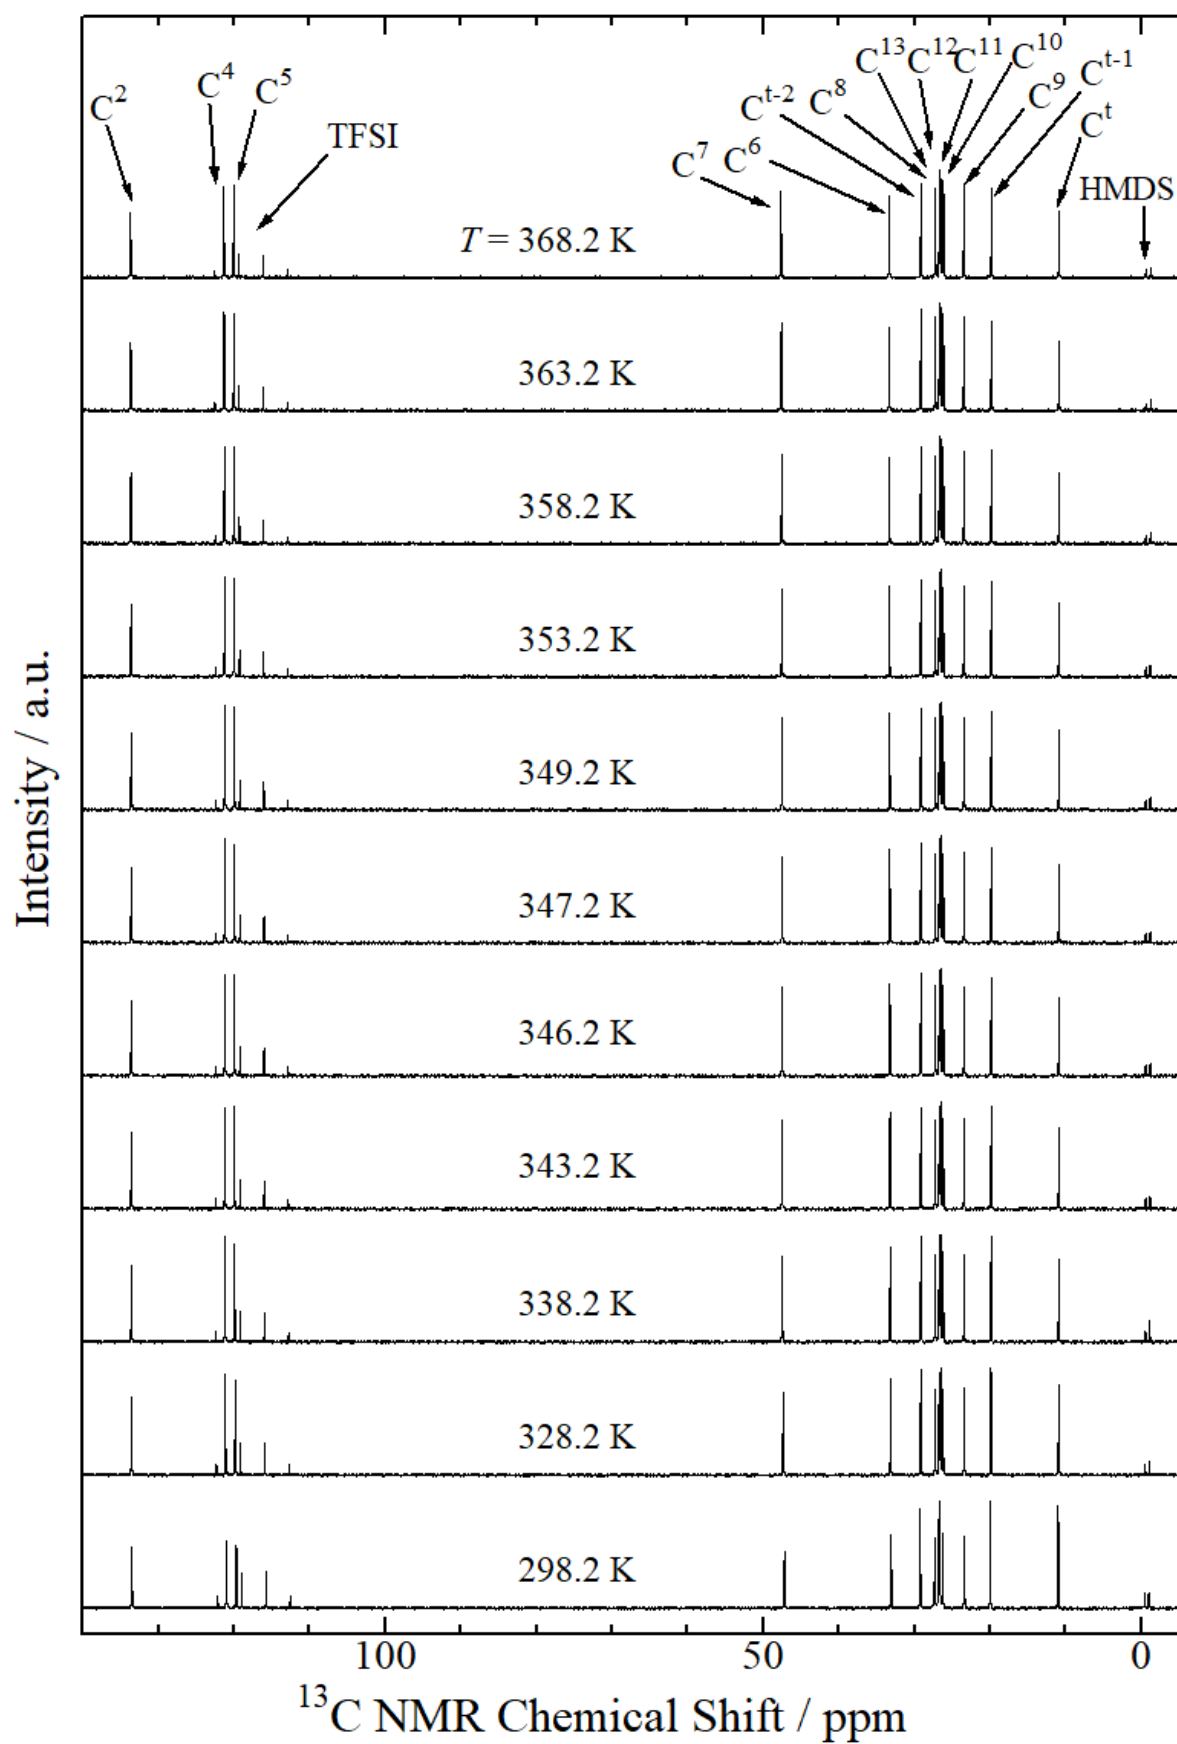

Fig. S12  $^{13}\text{C}$  NMR spectra of  $[\text{C}_{10}\text{mim}][\text{TFSI}]\text{-FA}$  system at  $x_{\text{FA}} = 0$  (neat IL) as a function of temperature from 368.2 to 298.2 K.

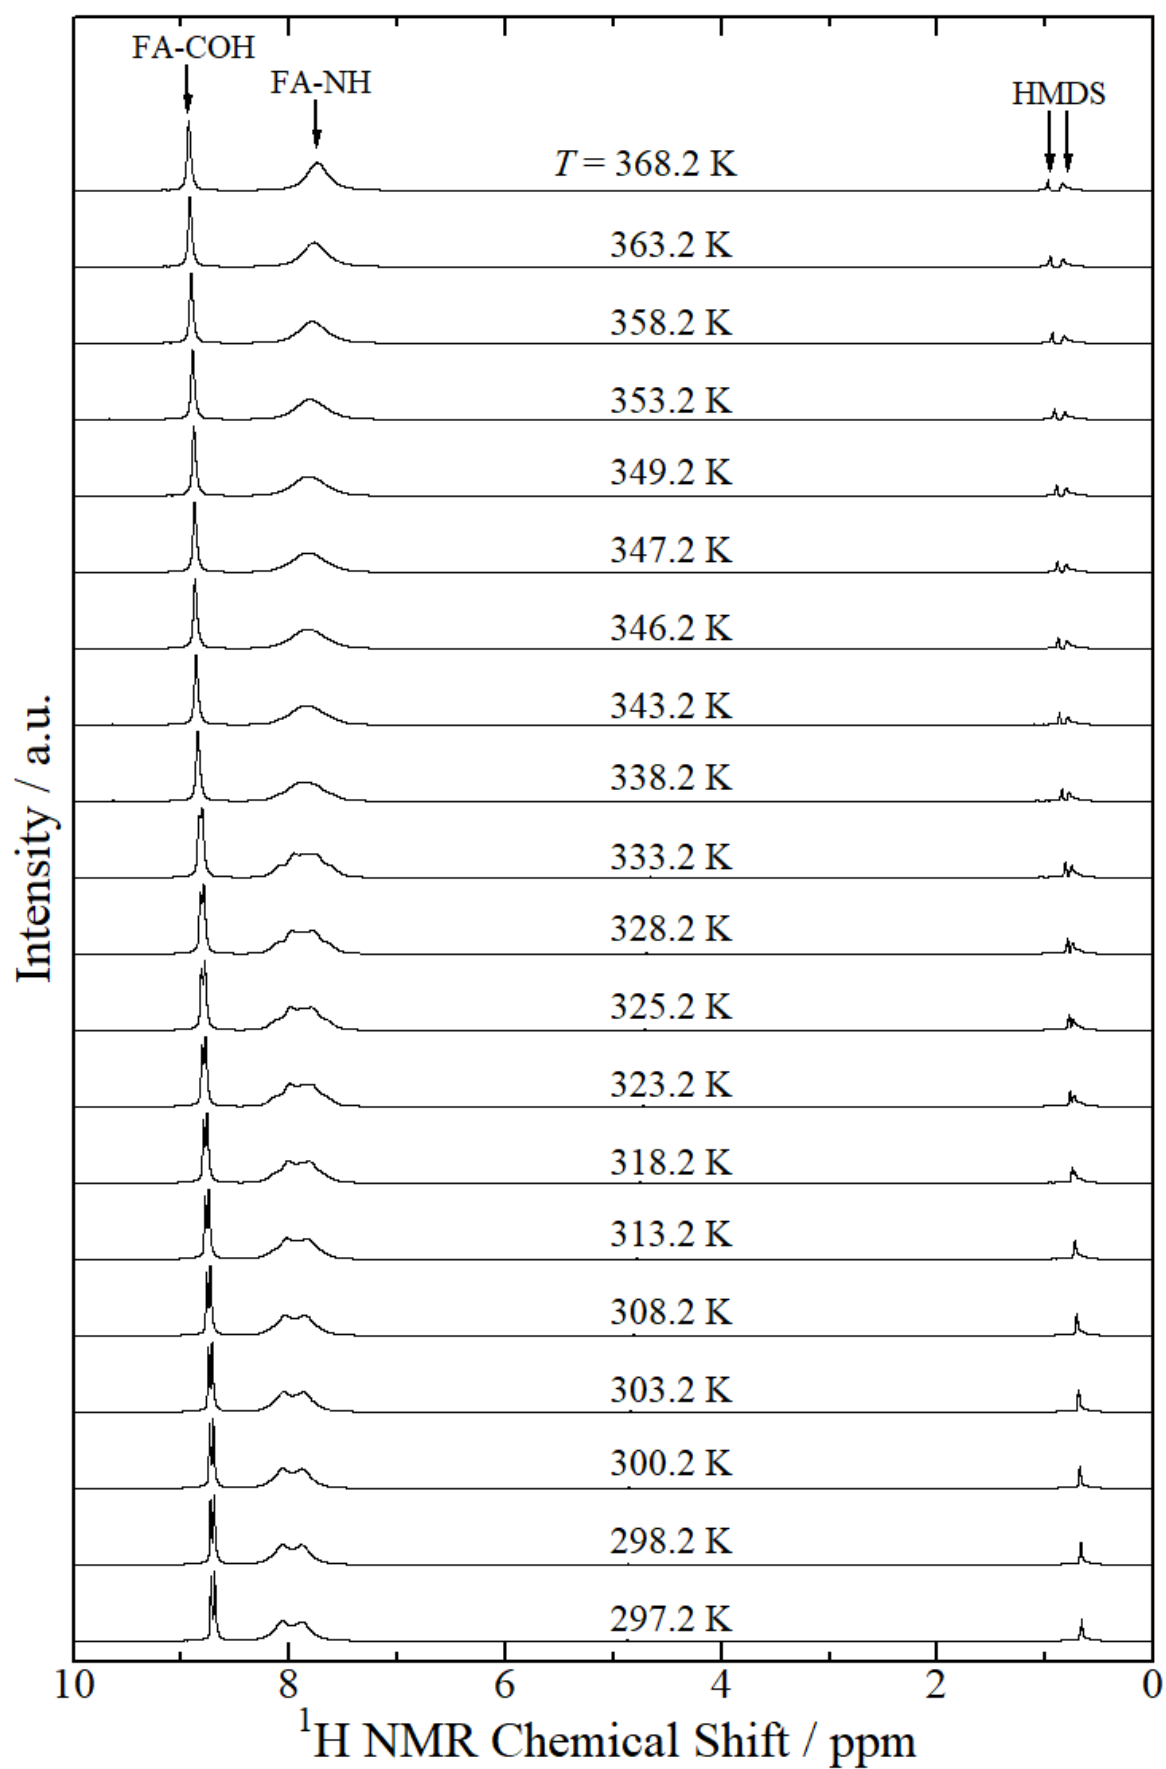

Fig. S13  $^1\text{H}$  NMR spectra of neat FA as a function of temperature from 368.2 to 297.2 K.

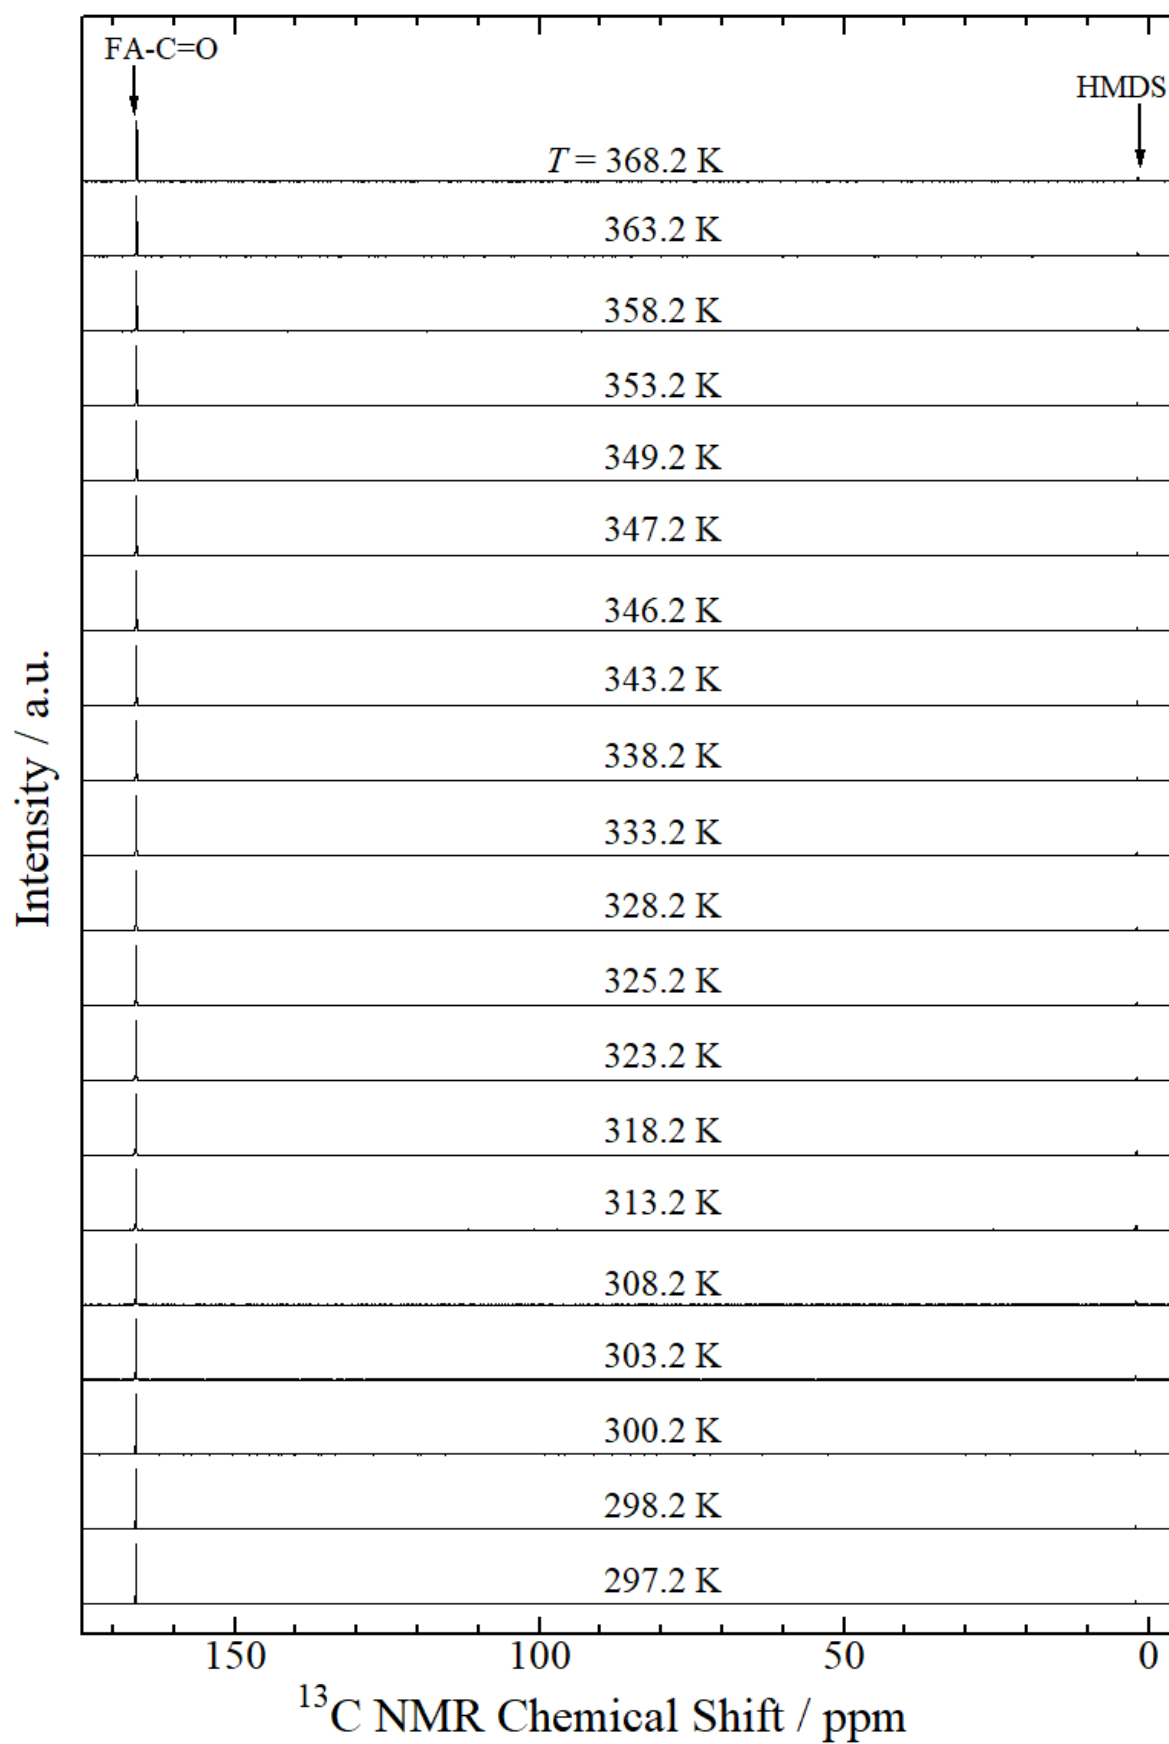

Fig. S14  $^{13}\text{C}$  NMR spectra of neat FA as a function of temperature from 368.2 to 297.2 K.

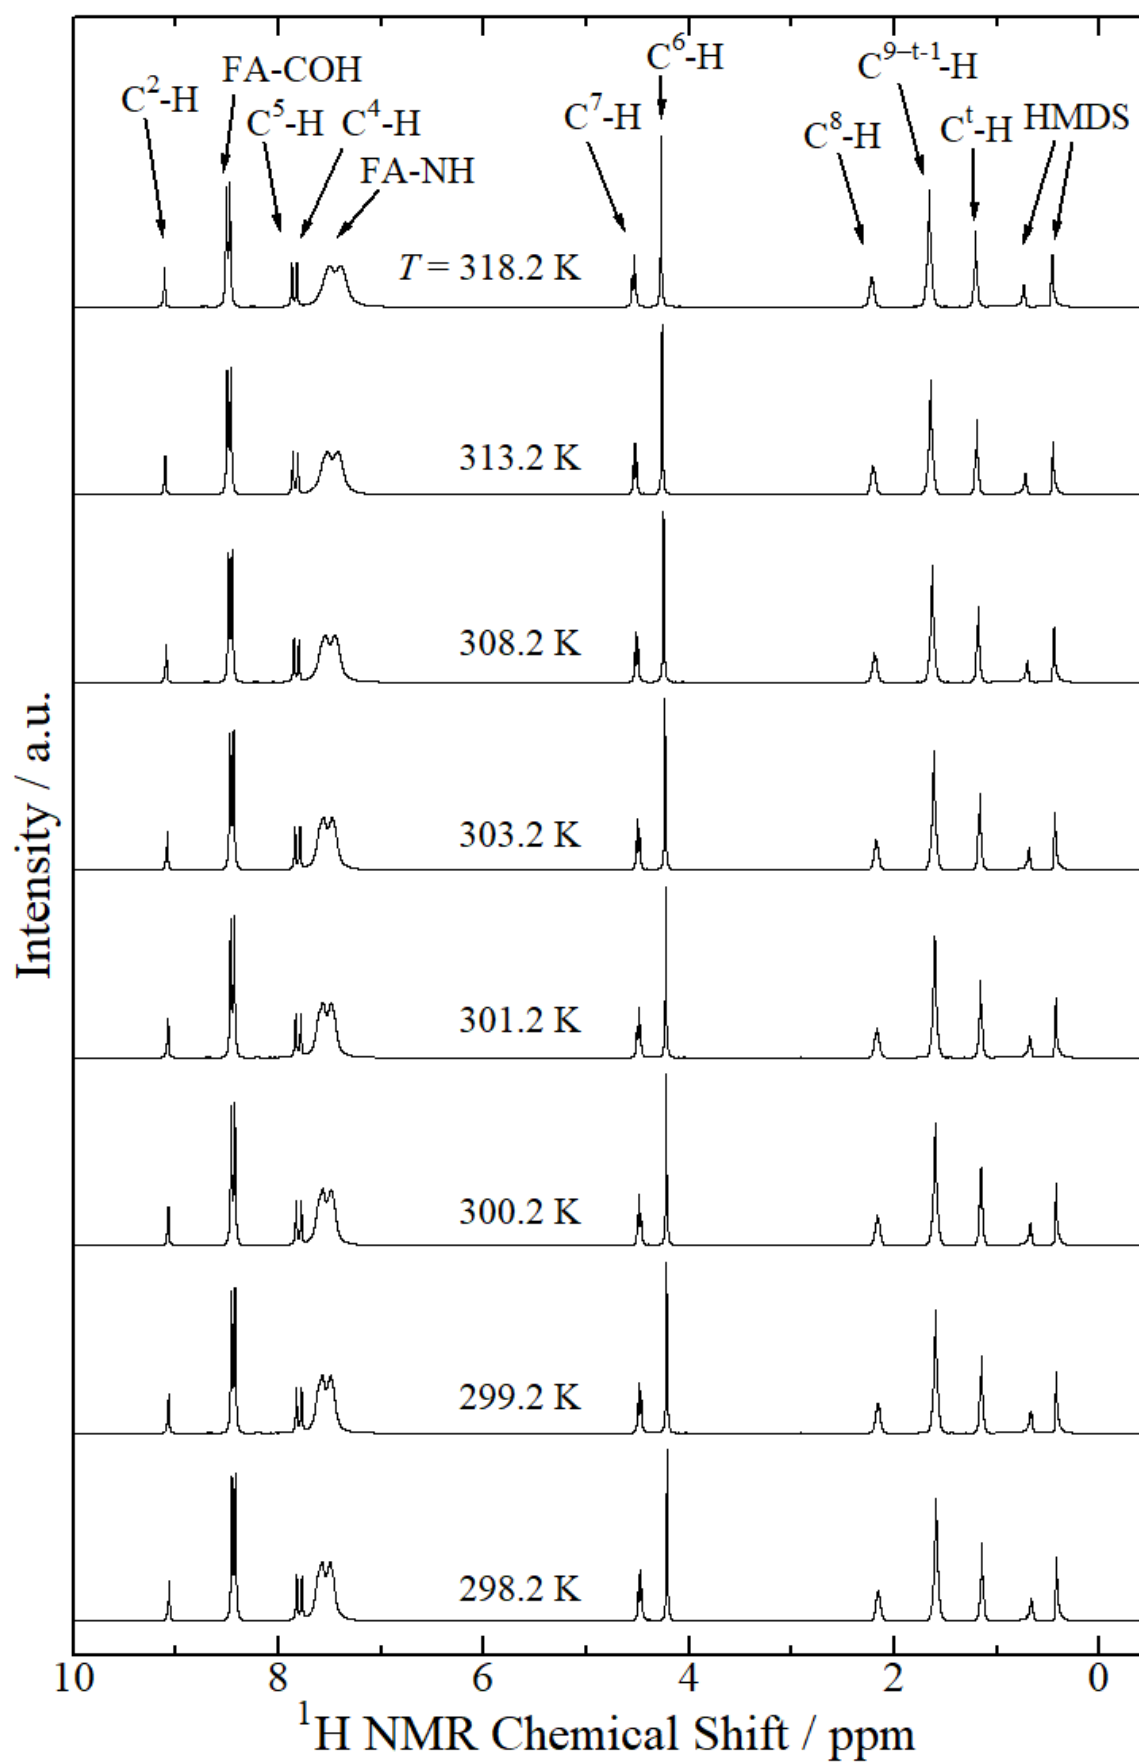

Fig. S15  $^1\text{H}$  NMR spectra of  $[\text{C}_6\text{mim}][\text{TFSI}]\text{-FA}$  system at  $x_{\text{FA}} = 0.881$  as a function of temperature from 318.2 to 298.2 K.



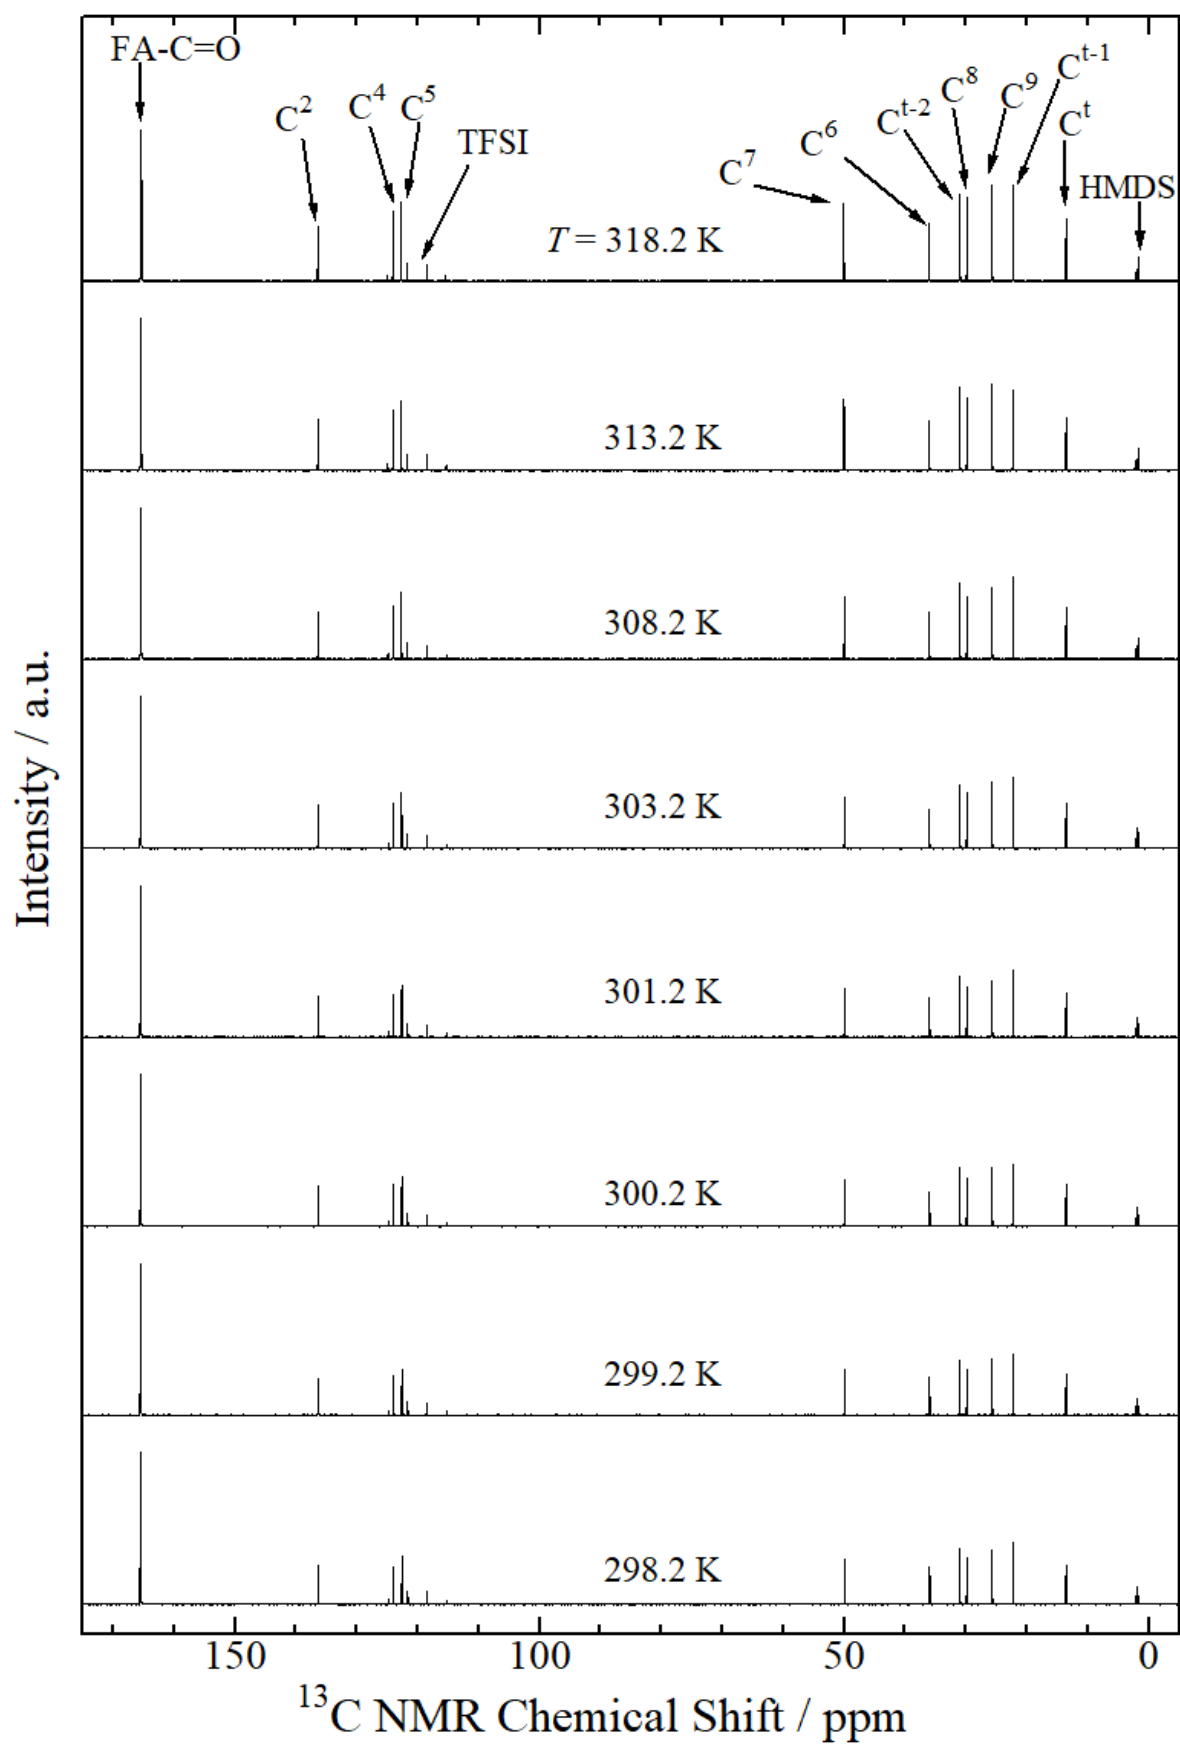

Fig. S16  $^{13}\text{C}$  NMR spectra of  $[\text{C}_6\text{mim}][\text{TFSI}]\text{-FA}$  system at  $x_{\text{FA}} = 0.881$  as a function of temperature from 318.2 to 298.2 K.

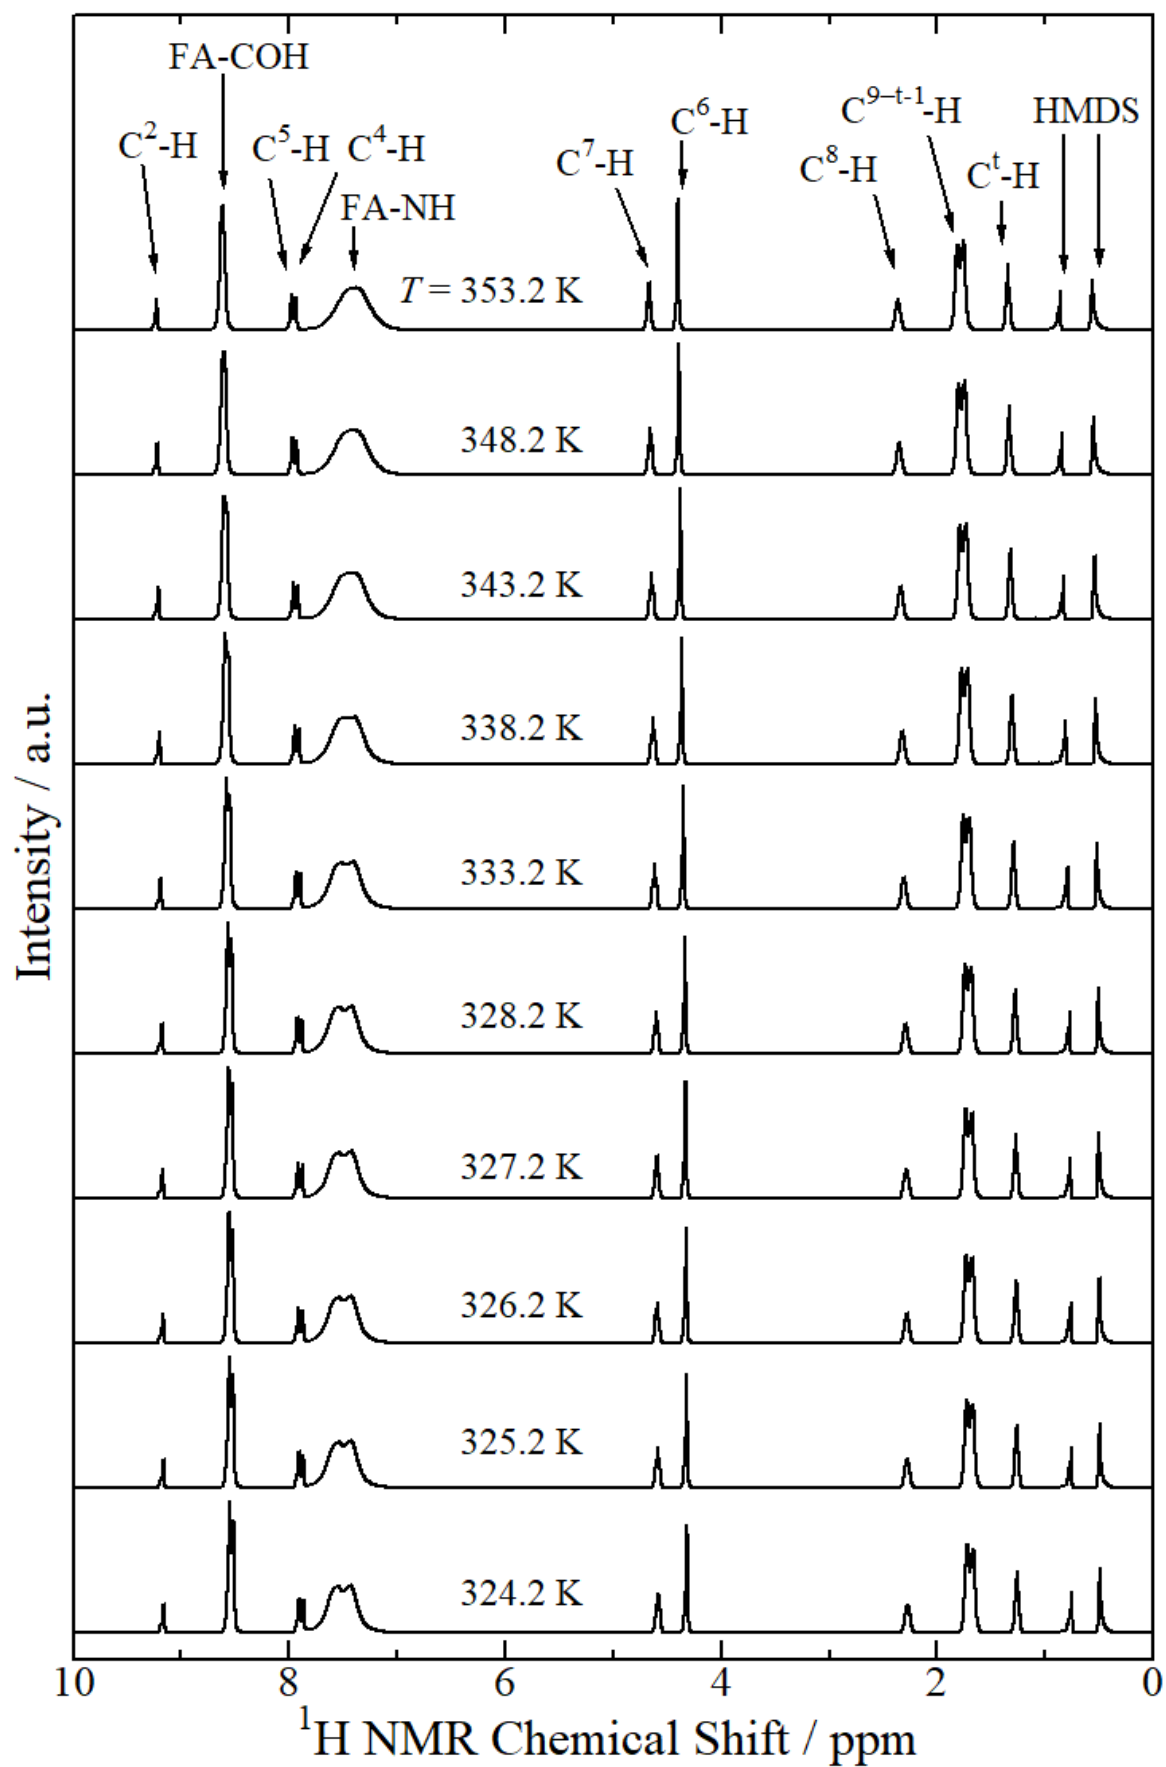

Fig. S17  $^1\text{H}$  NMR spectra of  $[\text{C}_8\text{mim}][\text{TFSI}]\text{-FA}$  system at  $x_{\text{FA}} = 0.900$  as a function of temperature from 353.2 to 324.2 K.

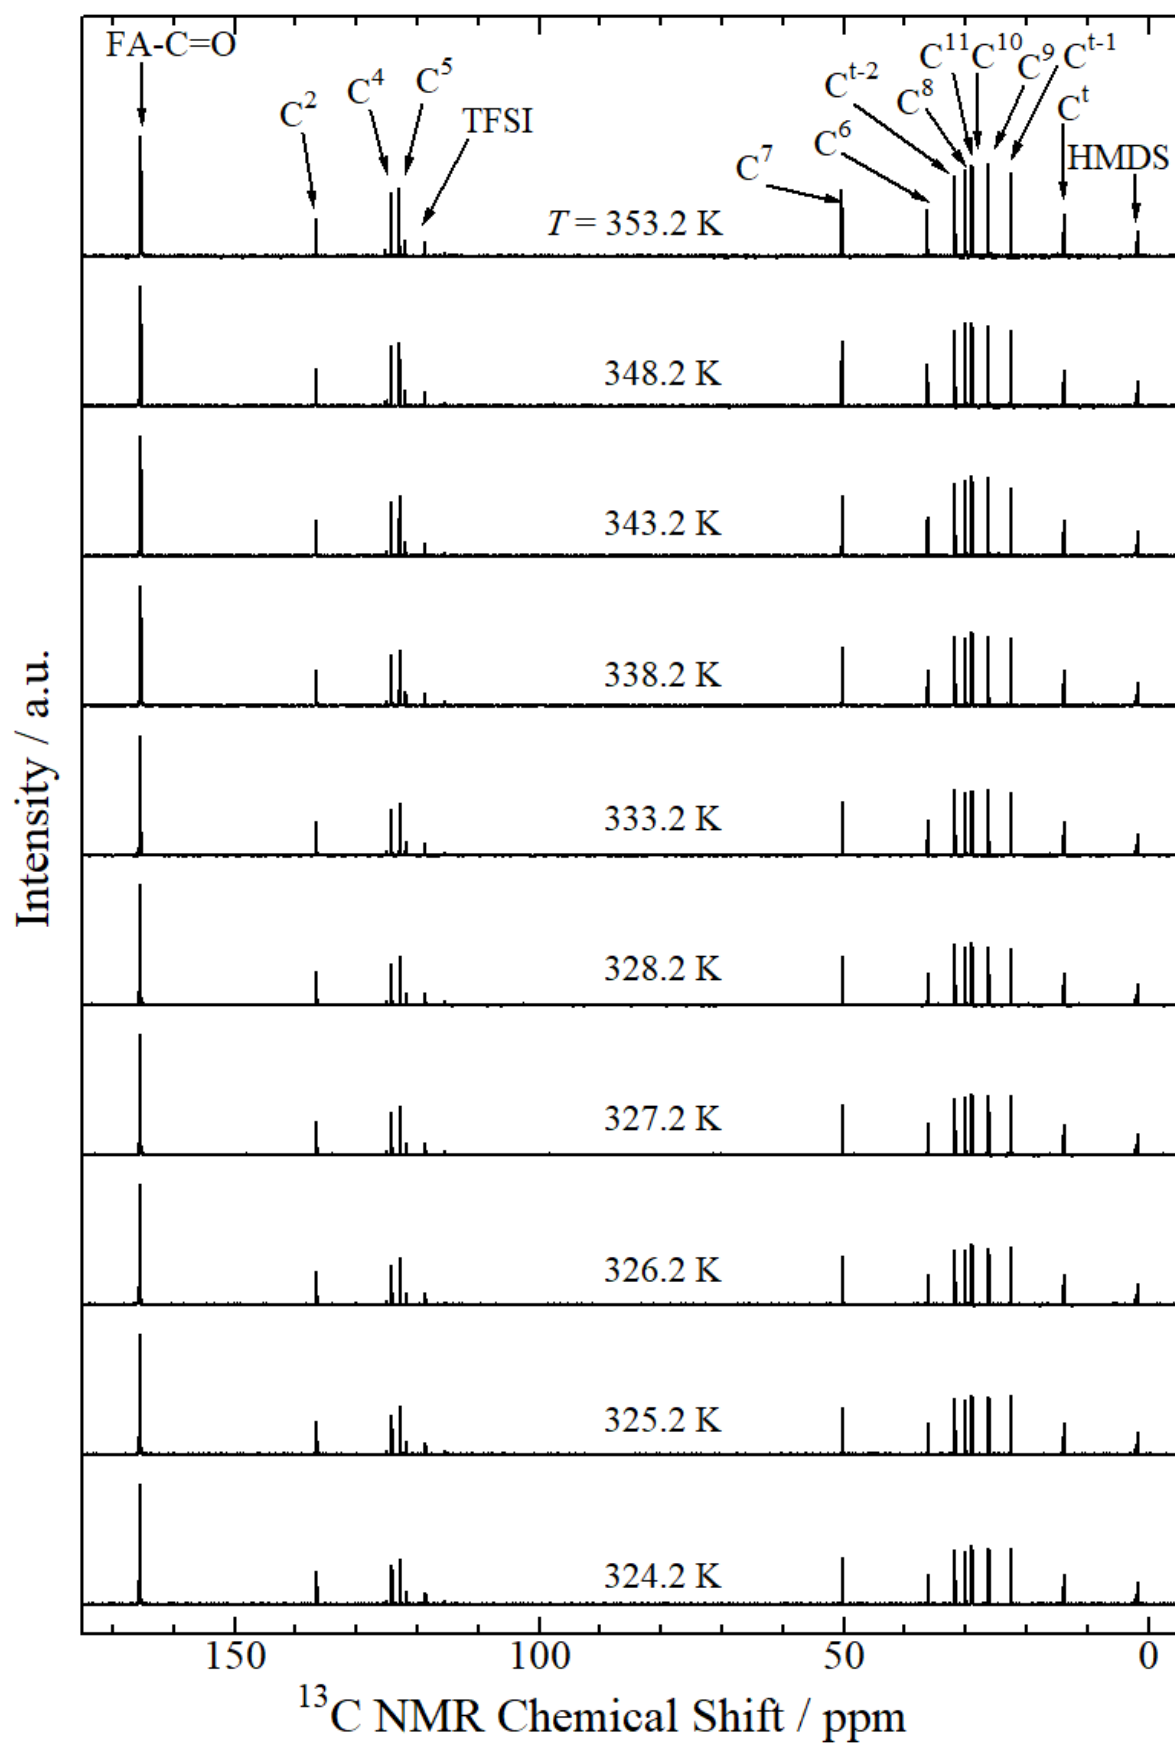

Fig. S18  $^{13}\text{C}$  NMR spectra of  $[\text{C}_8\text{mim}][\text{TFSI}]\text{-FA}$  system at  $x_{\text{FA}} = 0.900$  as a function of temperature from 353.2 to 324.2 K.

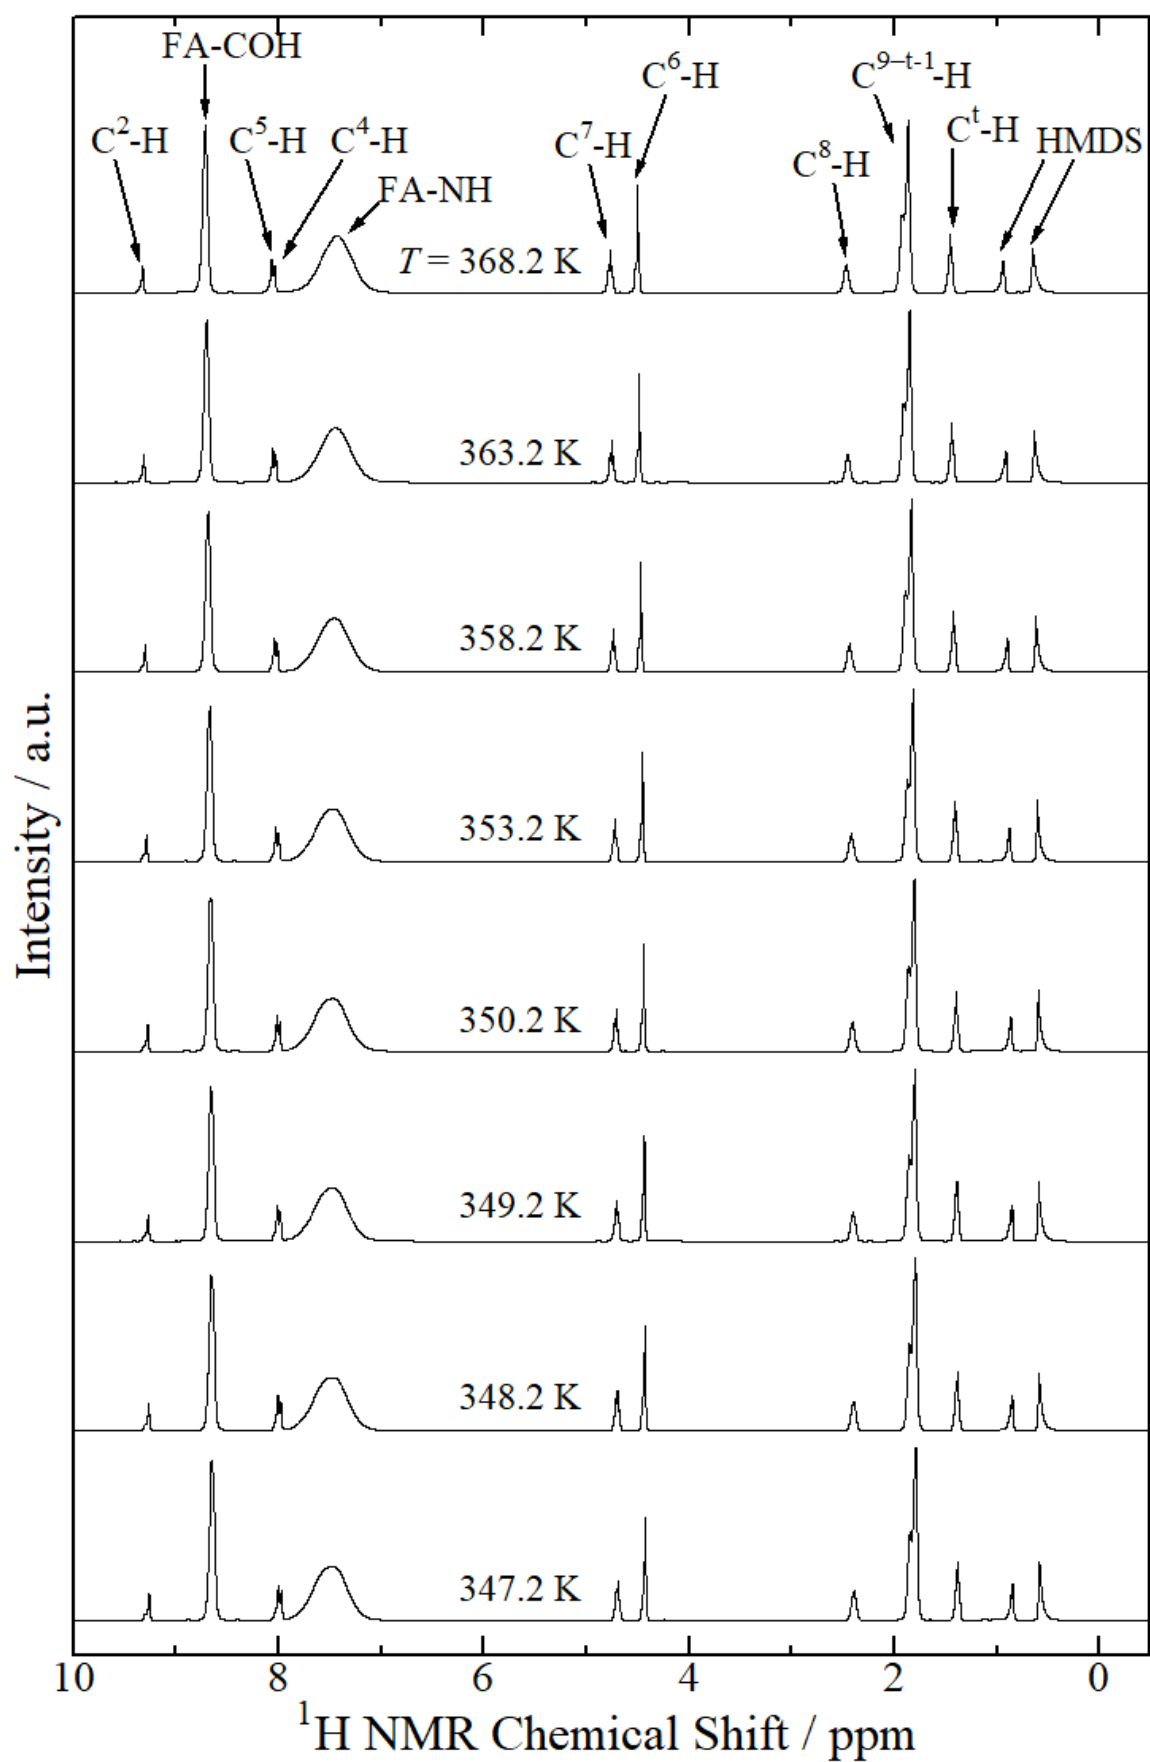

Fig. S19  $^1\text{H}$  NMR spectra of  $[\text{C}_{10}\text{mim}][\text{TFSI}]\text{-FA}$  system at  $x_{\text{FA}} = 0.926$  as a function of temperature from 368.2 to 347.2 K.

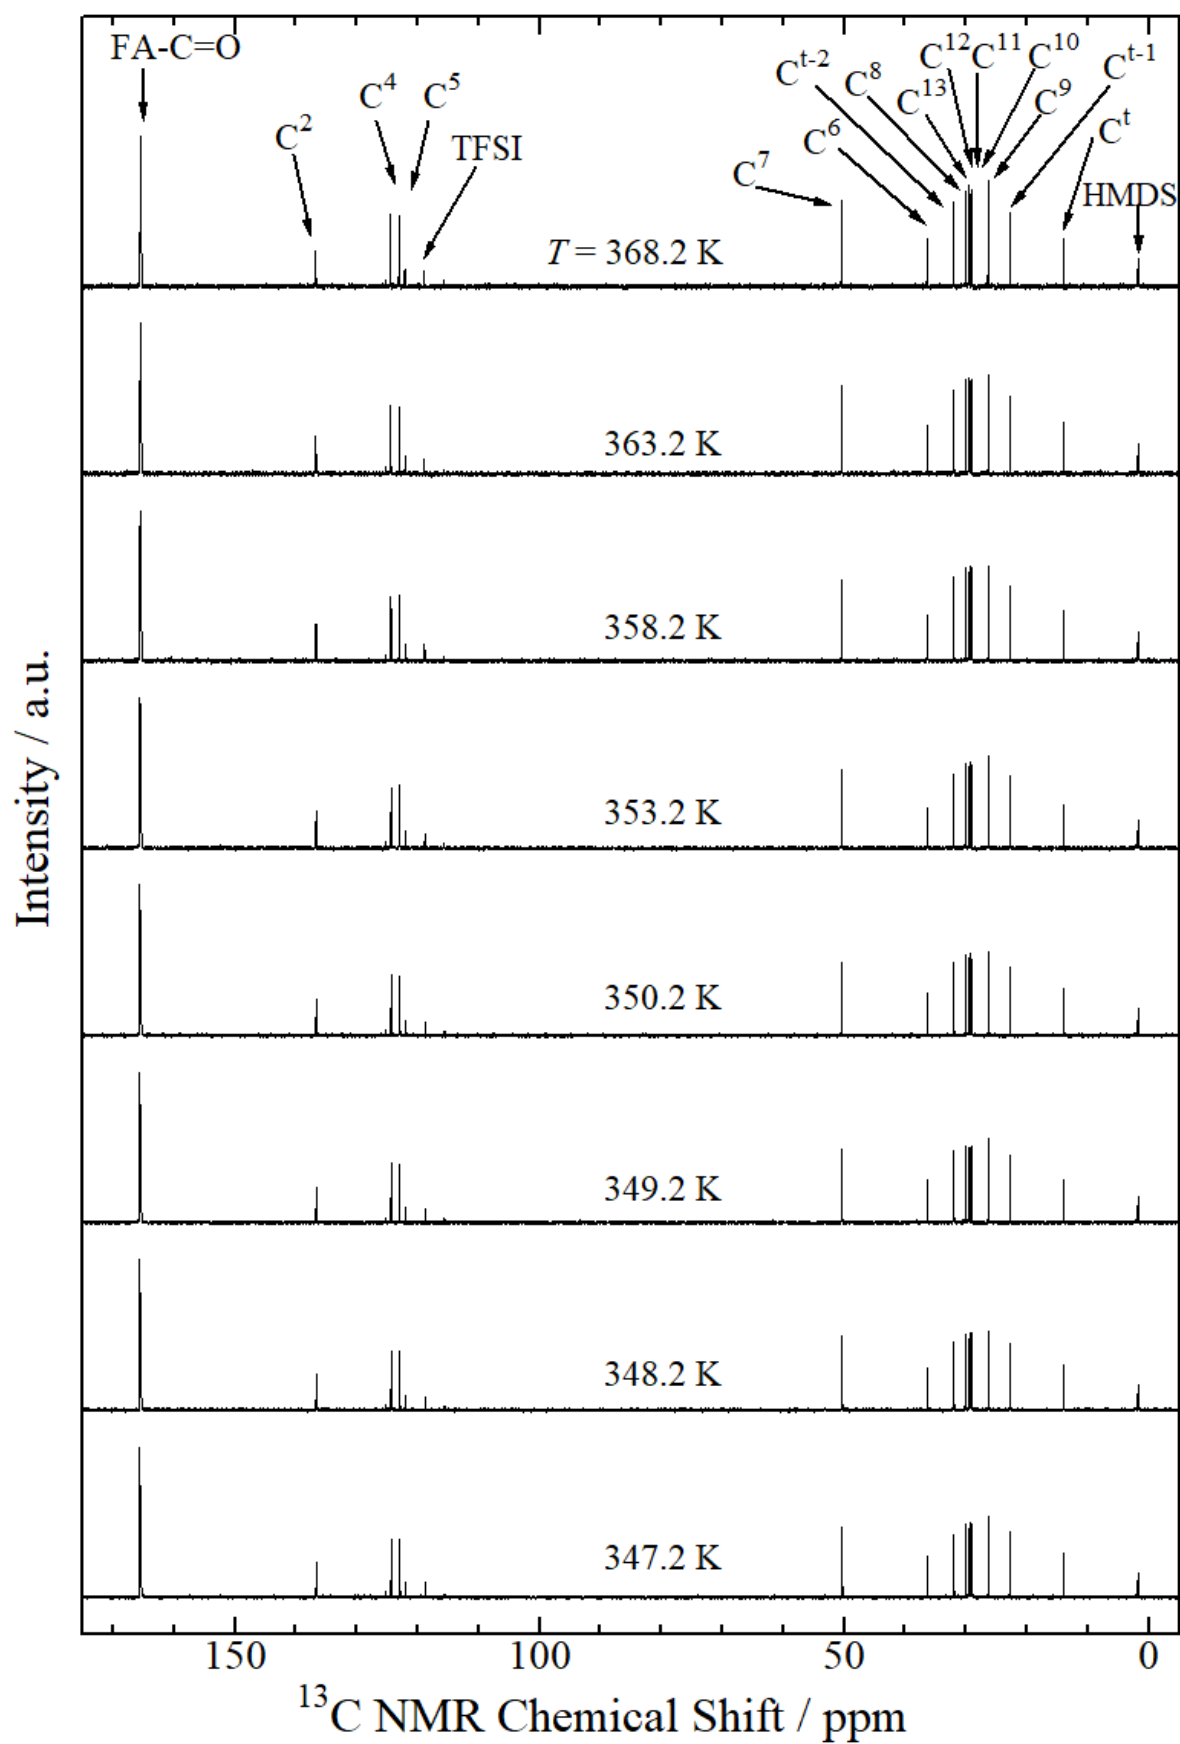

Fig. S20  $^{13}\text{C}$  NMR spectra of  $[\text{C}_{10}\text{mim}][\text{TFSI}]\text{-FA}$  system at  $x_{\text{FA}} = 0.926$  as a function of temperature from 368.2 to 347.2 K.

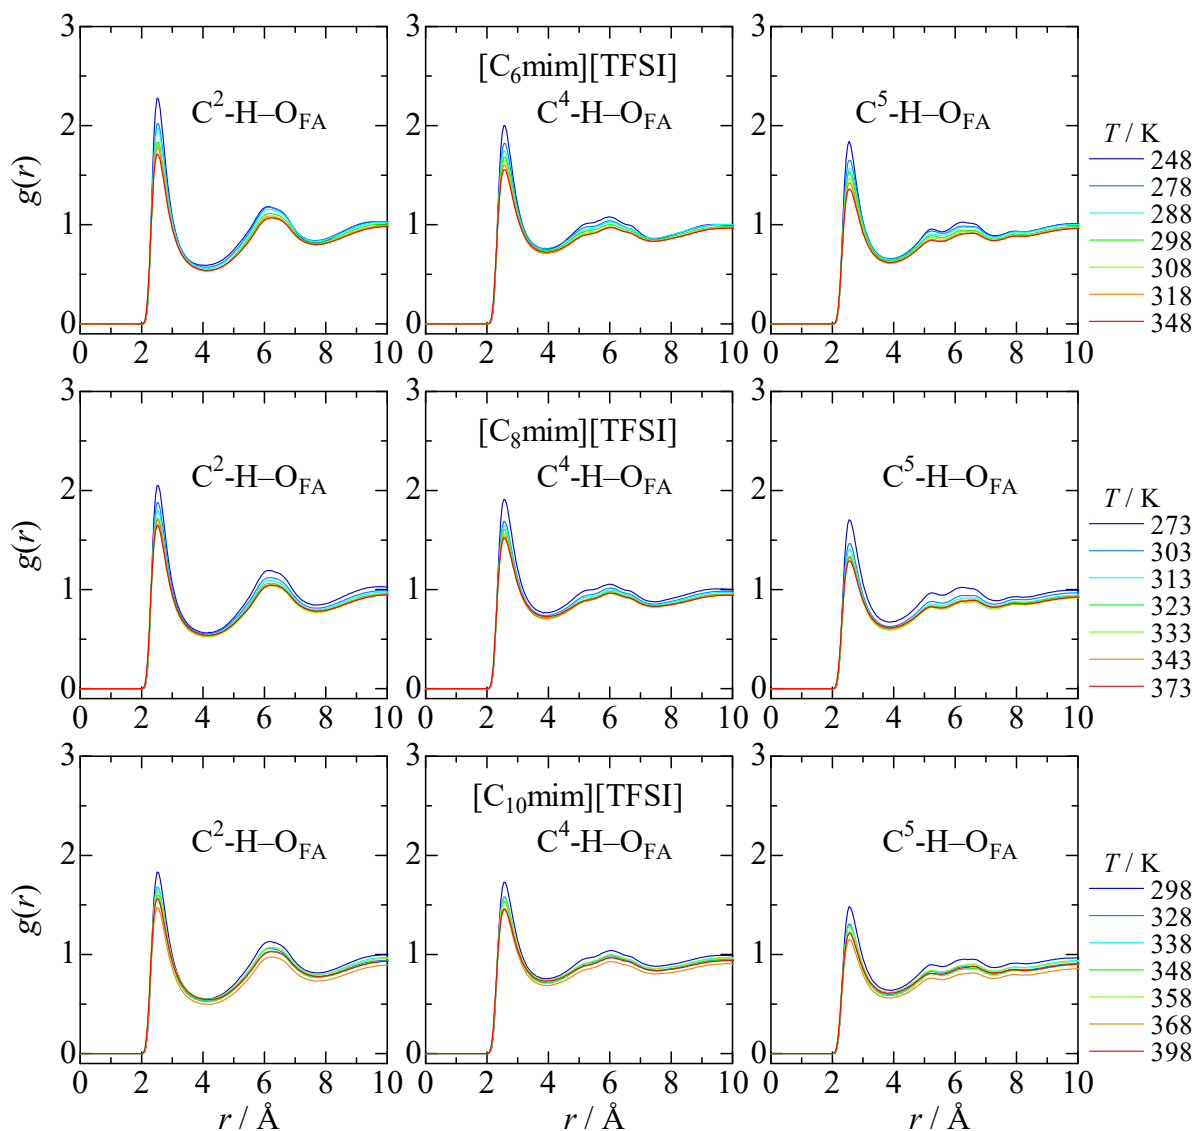

Fig. S21 Temperature dependence of MD pair correlation functions,  $g(r)$ s, for the  $C^{2,4,5}\text{-H-O}_{\text{FA}}$  interactions in  $[\text{C}_n\text{mim}][\text{TFSI}]\text{-FA}$  solutions (top:  $n = 6$ , middle:  $n = 8$ , and bottom  $n = 10$ , respectively) at each UCST composition ( $x_{\text{FA}} = 0.881, 0.900$ , and  $0.926$ , respectively).

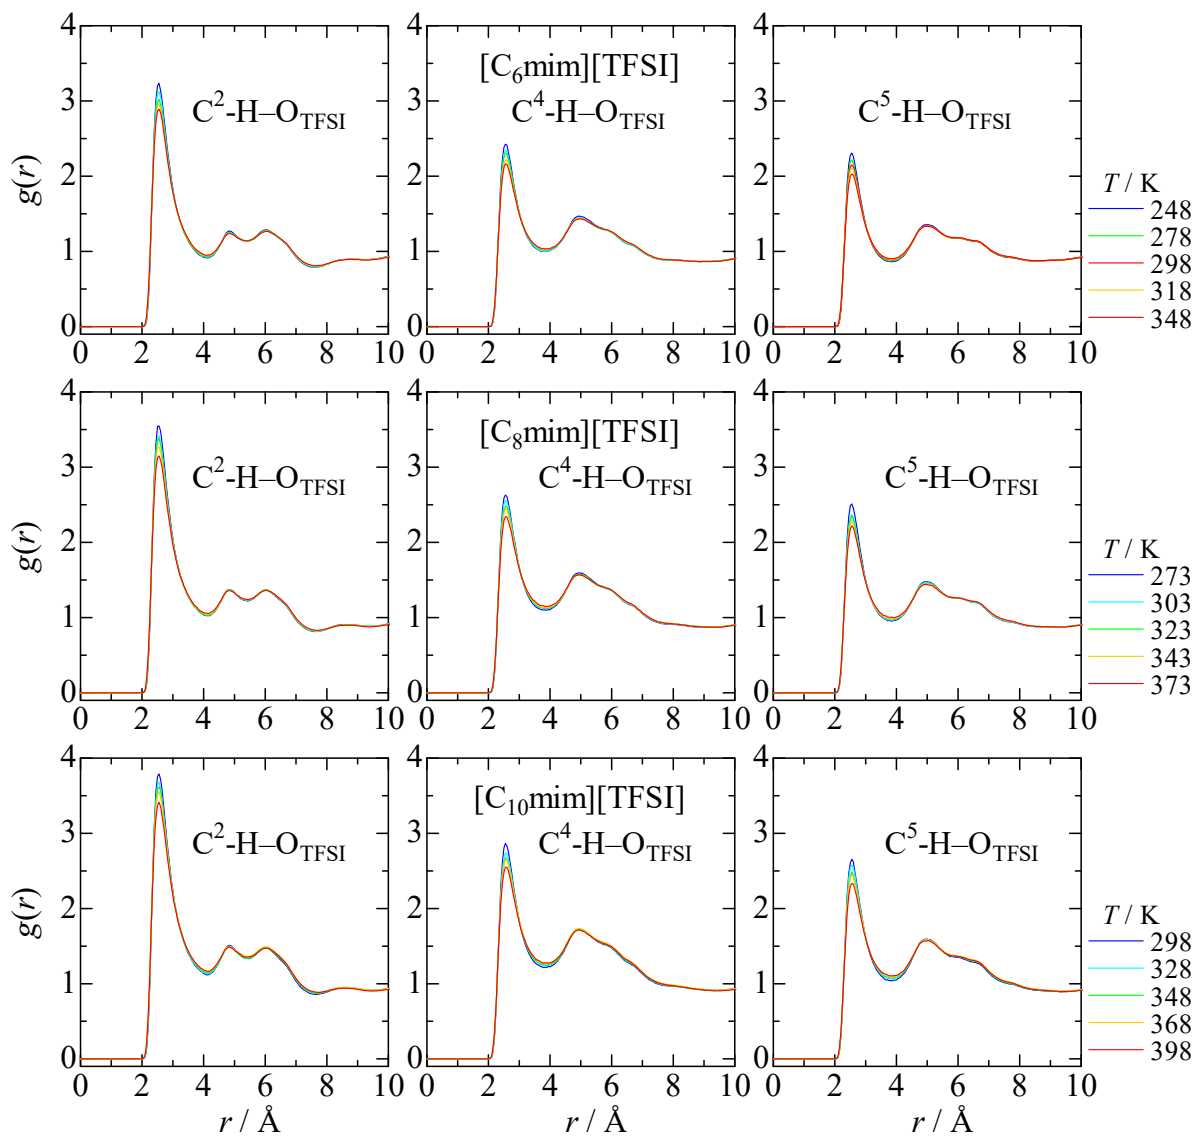

Fig. S22 Temperature dependence of MD pair correlation functions,  $g(r)$ s, for the  $C^{2,4,5}$ - $H-O_{TFSI}$  interactions in neat  $[C_nmim][TFSI]$  systems (top:  $n = 6$ , middle:  $n = 8$ , and bottom  $n = 10$ , respectively). The  $g(r)$ s of the  $C^{2,4,5}$ - $H-O_{TFSI}$  interactions were calculated for one of the four O atoms within  $[TFSI]^-$ .

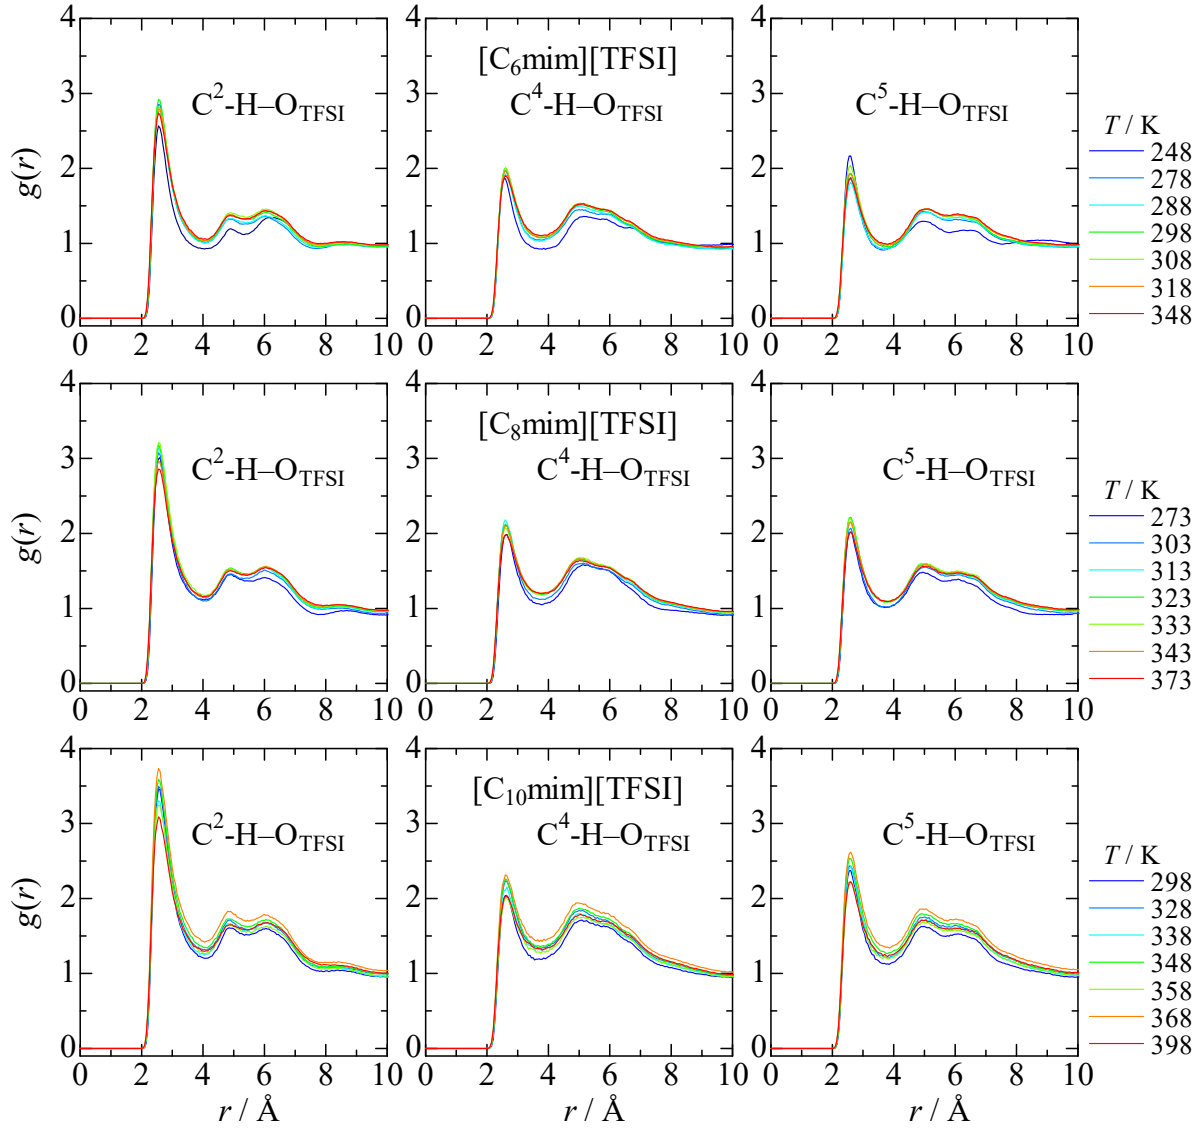

Fig. S23 Temperature dependence of MD pair correlation functions,  $g(r)$ s, for the  $C^{2,4,5}$ - $H-O_{TFSI}$  interactions in  $[C_n\text{mim}][\text{TFSI}]-\text{FA}$  solutions (top:  $n = 6$ , middle:  $n = 8$ , and bottom  $n = 10$ , respectively) at each UCST composition ( $x_{\text{FA}} = 0.881, 0.900$ , and  $0.926$ , respectively). The  $g(r)$ s of the  $C^{2,4,5}$ - $H-O_{TFSI}$  interactions were calculated for one of the four O atoms within  $[\text{TFSI}]^-$ .



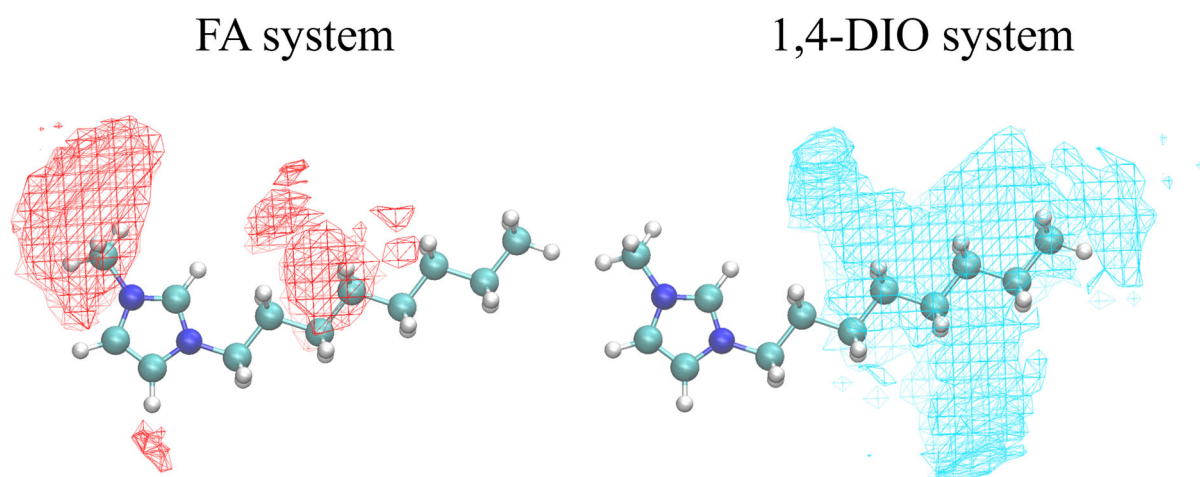

Fig.S24 MD spatial distribution functions (SDFs) for the center of mass of FA (red meshes) and 1,4-DIO (light-blue meshes) around  $[C_8mim]^+$  in  $[C_8mim][TFSI]$ -FA (left) and -1,4-DIO (right) solutions at  $x_{FA} = 0.900$  and 343.2 K and  $x_{1,4-DIO} = 0.983$  and 323.2 K, respectively.

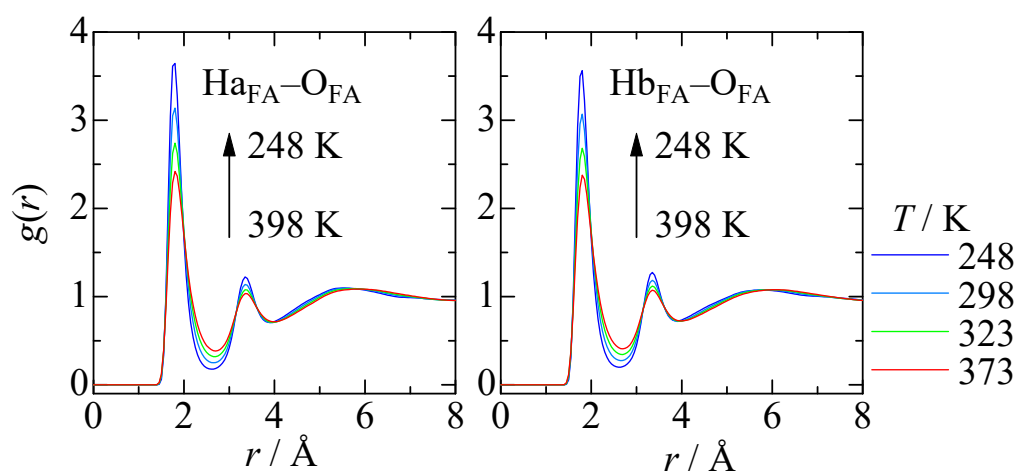

Fig. S25 Temperature dependence of MD pair correlation functions,  $g(r)$ s, for the  $Ha_{FA}-O_{FA}$  (left) and the  $Hb_{FA}-O_{FA}$  (right) interactions in neat FA.

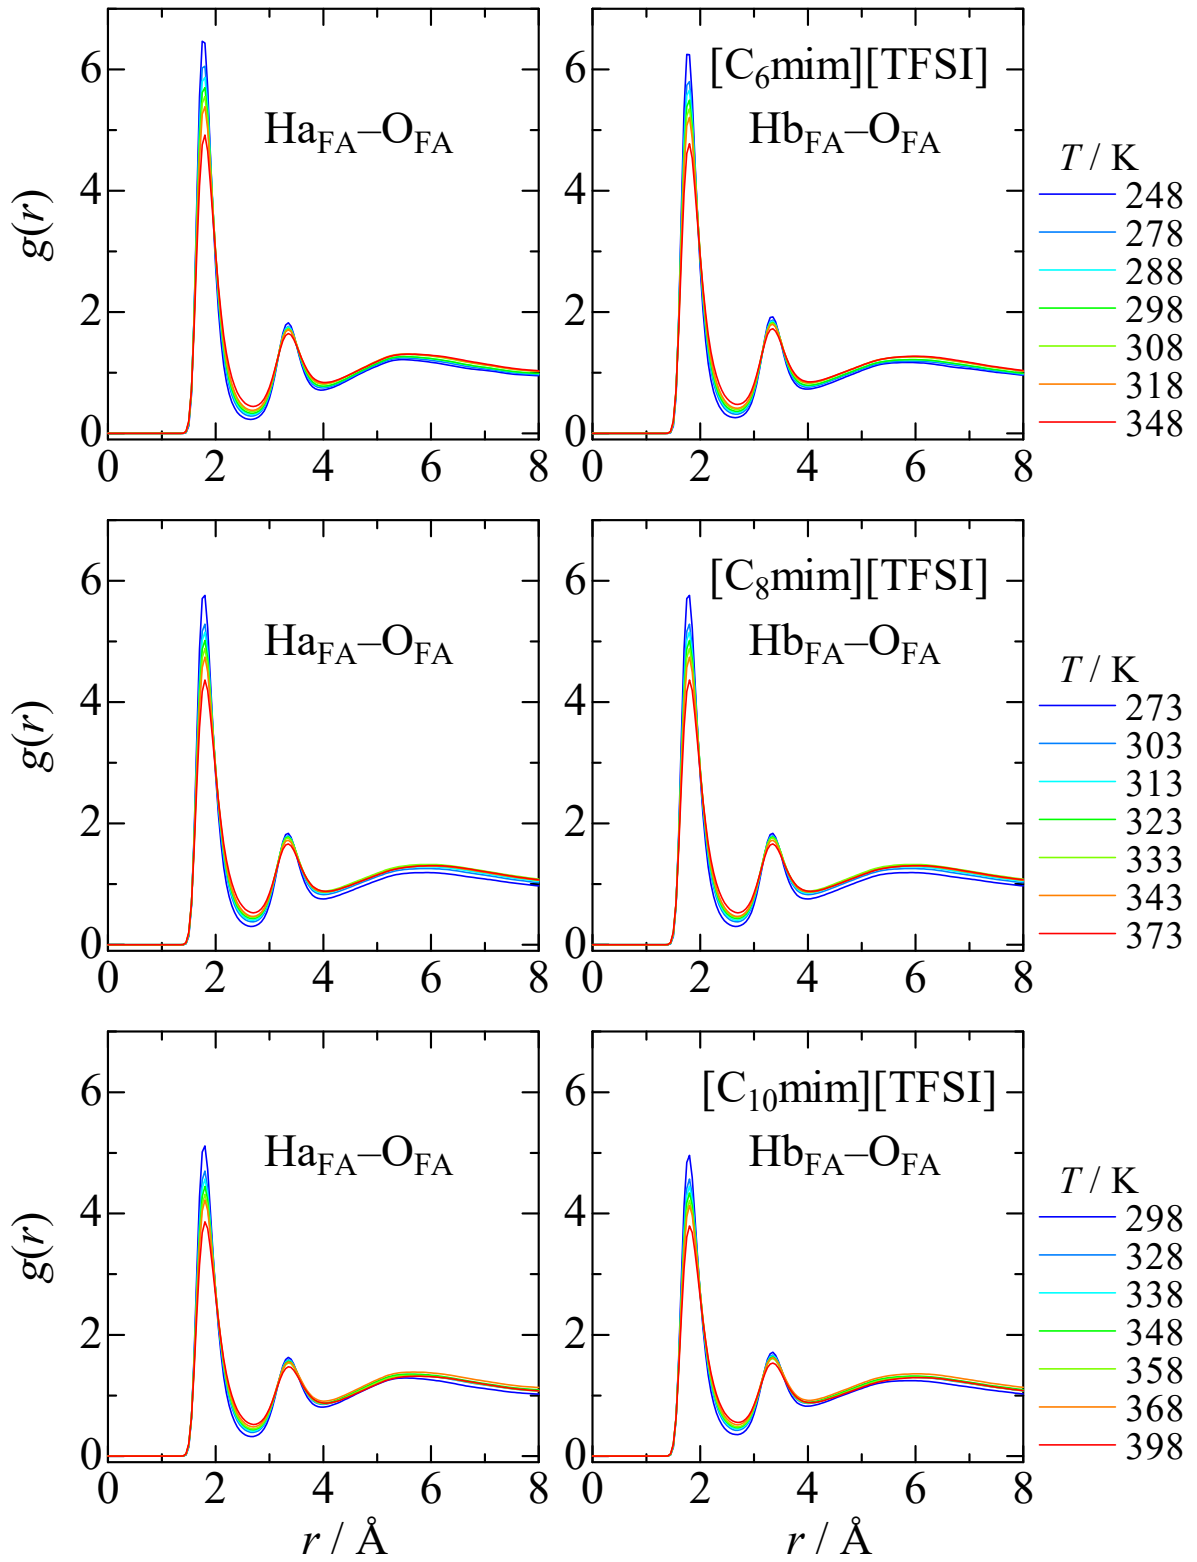

Fig. S26 Temperature dependence of MD pair correlation functions,  $g(r)$ s, for the  $\text{Ha}_{\text{FA}}-\text{O}_{\text{FA}}$  (left) and the  $\text{Hb}_{\text{FA}}-\text{O}_{\text{FA}}$  (right) interactions in  $[\text{C}_n\text{mim}][\text{TFSI}]-\text{FA}$  solutions (top:  $n = 6$ , middle:  $n = 8$ , and bottom:  $n = 10$ ) at the UCST compositions ( $n = 6, 8$ , and  $10$ ,  $x_{\text{FA}} = 0.881, 0.900$ , and  $0.926$ , respectively).

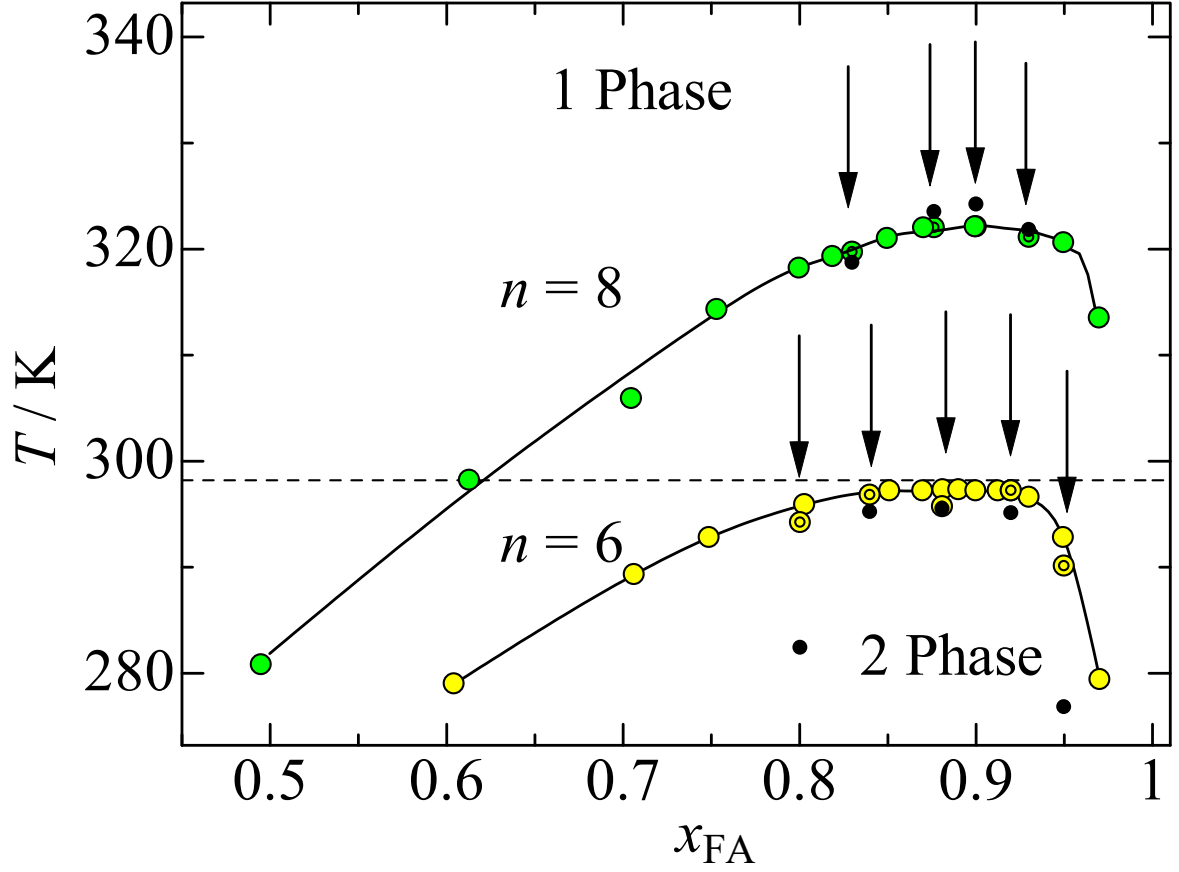

Fig. S27 Phase diagrams of  $[C_n \text{mim}][\text{TFSI}]-\text{FA}$  ( $n = 6$ , and  $8$ ) and  $[C_n \text{mim}][\text{TFSI}]-\text{FA}-d_2$  systems. The single and double circles represent the experimental binodal temperatures for  $[C_n \text{mim}][\text{TFSI}]-\text{FA}$  and  $-\text{FA}-d_2$  systems, respectively. The solid lines are guide for eyes. The horizontal broken line indicates  $298.2$  K. The SANS experiments for  $[C_6 \text{mim}][\text{TFSI}]-\text{FA}-d_2$  systems at  $x_{\text{FA}-d_2} = 0.800, 0.840, 0.881, 0.920$ , and  $0.950$  and  $[C_8 \text{mim}][\text{TFSI}]-\text{FA}-d_2$  systems at  $x_{\text{FA}-d_2} = 0.830, 0.876, 0.900$ , and  $0.930$  were made with lowering temperature along the arrows. Dots give spinodal temperatures  $T_s$  for  $[C_n \text{mim}][\text{TFSI}]-\text{FA}-d_2$  systems estimated using eqns (S1) and (S2).

Table S7 Ornstein–Zernike correlation lengths  $\xi$  and scattering intensities  $I_0$  determined by SANS experiments for [C<sub>6</sub>mim][TFSI]–FA-*d*<sub>2</sub> solutions at  $x_{\text{FA-}d_2} = 0.800, 0.840, 0.881, 0.920$ , and 0.950 and various temperatures.<sup>a</sup>

| [C <sub>6</sub> mim][TFSI]–FA- <i>d</i> <sub>2</sub> |                |                    |                        |                     |                |                    |                        |
|------------------------------------------------------|----------------|--------------------|------------------------|---------------------|----------------|--------------------|------------------------|
| $x_{\text{FA-}d_2}$                                  | $T / \text{K}$ | $\xi / \text{\AA}$ | $I_0 / \text{cm}^{-1}$ | $x_{\text{FA-}d_2}$ | $T / \text{K}$ | $\xi / \text{\AA}$ | $I_0 / \text{cm}^{-1}$ |
| 0.800                                                | 293.2          | 27.4(2)            | 1.386(8)               | 0.881               | 296.7          | 78.0(7)            | 14.9(1)                |
|                                                      | 293.7          | 26.1(2)            | 1.275(5)               |                     | 297.2          | 65.6(6)            | 10.57(9)               |
|                                                      | 294.0          | 25.1(2)            | 1.190(5)               |                     | 297.7          | 55.8(7)            | 7.54(7)                |
|                                                      | 294.2          | 24.7(1)            | 1.135(4)               |                     | 298.2          | 48.2(4)            | 5.86(4)                |
|                                                      | 294.4          | 24.1(2)            | 1.077(6)               |                     | 300.2          | 34.3(2)            | 3.013(1)               |
|                                                      | 294.7          | 23.1(2)            | 1.010(5)               |                     | 303.2          | 25.8(2)            | 1.685(6)               |
|                                                      | 295.2          | 22.2(2)            | 0.930(6)               |                     | 308.2          | 19.8(2)            | 0.948(5)               |
|                                                      | 295.7          | 20.8(1)            | 0.829(4)               |                     | 313.2          | 16.9(2)            | 0.655(5)               |
|                                                      | 296.2          | 20.0(1)            | 0.772(3)               |                     | 318.2          | 14.9(2)            | 0.503(4)               |
|                                                      | 297.2          | 18.9(1)            | 0.671(3)               | 0.920               | 296.2          | 65.3(5)            | 8.79(8)                |
|                                                      | 298.2          | 17.8(2)            | 0.600(4)               |                     | 296.5          | 54.5(2)            | 6.39(3)                |
|                                                      | 300.2          | 16.2(2)            | 0.487(3)               |                     | 296.8          | 49.5(3)            | 5.28(3)                |
|                                                      | 303.2          | 14.4(2)            | 0.375(2)               |                     | 297.0          | 46.4(2)            | 4.64(2)                |
|                                                      | 308.2          | 12.7(2)            | 0.281(2)               |                     | 297.2          | 44.1(3)            | 4.26(2)                |
|                                                      | 313.2          | 11.6(3)            | 0.222(3)               |                     | 297.4          | 42.4(3)            | 3.92(2)                |
|                                                      | 318.2          | 11.0(3)            | 0.188(2)               |                     | 297.7          | 38.8(2)            | 3.32(1)                |
|                                                      |                |                    |                        |                     | 298.2          | 35.9(2)            | 2.86(1)                |
| 0.840                                                | 296.5          | 66.8(4)            | 9.15(5)                |                     | 299.2          | 30.9(1)            | 2.155(6)               |
|                                                      | 296.8          | 58.7(3)            | 7.18(4)                |                     | 300.2          | 27.6(1)            | 1.739(6)               |
|                                                      | 297.0          | 54.4(3)            | 6.25(3)                |                     | 303.2          | 22.3(1)            | 1.132(4)               |
|                                                      | 297.2          | 51.0(3)            | 5.43(3)                |                     | 308.2          | 17.9(1)            | 0.715(3)               |
|                                                      | 297.4          | 47.4(2)            | 4.78(2)                |                     | 313.2          | 15.4(2)            | 0.525(3)               |
|                                                      | 297.7          | 43.3(3)            | 4.00(2)                |                     | 318.2          | 13.5(1)            | 0.409(2)               |
|                                                      | 297.9          | 41.6(3)            | 3.67(2)                | 0.950               | 290.2          | 17.9(1)            | 0.601(3)               |
|                                                      | 298.2          | 37.8(2)            | 3.12(1)                |                     | 291.2          | 17.4(2)            | 0.547(3)               |
|                                                      | 298.7          | 34.6(2)            | 2.60(1)                |                     | 292.2          | 16.6(2)            | 0.508(3)               |
|                                                      | 299.2          | 32.0(2)            | 2.242(9)               |                     | 293.2          | 16.3(2)            | 0.476(4)               |
|                                                      | 300.2          | 27.6(1)            | 1.703(5)               |                     | 294.2          | 15.7(2)            | 0.440(3)               |
|                                                      | 303.2          | 21.7(2)            | 1.052(5)               |                     | 295.2          | 15.2(2)            | 0.422(3)               |
|                                                      | 308.2          | 16.9(2)            | 0.647(5)               |                     | 298.2          | 14.1(2)            | 0.357(2)               |
|                                                      | 313.2          | 14.3(2)            | 0.451(4)               |                     | 303.2          | 13.1(2)            | 0.290(2)               |
|                                                      | 318.2          | 12.3(2)            | 0.347(3)               |                     | 308.2          | 12.3(2)            | 0.251(3)               |
| 0.881                                                | 295.7          | 244.0(42)          | 140.6(38)              |                     | 313.2          | 11.6(2)            | 0.215(2)               |
|                                                      | 295.9          | 154.6(15)          | 58.0(7)                |                     | 318.2          | 11.3(3)            | 0.195(2)               |
|                                                      | 296.2          | 114.2(9)           | 31.6(3)                |                     |                |                    |                        |

<sup>a</sup> The values in the parentheses are the estimated standard deviation  $\sigma$  of the last figure.

Table S8 Ornstein–Zernike correlation lengths  $\xi$  and scattering intensities  $I_0$  determined by SANS experiments for [C<sub>8</sub>mim][TFSI]–FA-*d*<sub>2</sub> solutions at  $x_{\text{FA-}d_2} = 0.830, 0.876, 0.900$ , and  $0.930$  and various temperatures.<sup>a</sup>

| [C <sub>8</sub> mim][TFSI]–FA- <i>d</i> <sub>2</sub> |                |                    |                        |                     |                |                    |                        |
|------------------------------------------------------|----------------|--------------------|------------------------|---------------------|----------------|--------------------|------------------------|
| $x_{\text{FA-}d_2}$                                  | $T / \text{K}$ | $\xi / \text{\AA}$ | $I_0 / \text{cm}^{-1}$ | $x_{\text{FA-}d_2}$ | $T / \text{K}$ | $\xi / \text{\AA}$ | $I_0 / \text{cm}^{-1}$ |
| 0.830                                                | 322.2          | 28.4(2)            | 1.400(8)               | 0.900               | 324.2          | 764.51(5)          | 1395.90(1)             |
|                                                      | 323.2          | 27.1(2)            | 1.301(7)               |                     | 325.2          | 91.6(7)            | 20.5(2)                |
|                                                      | 325.2          | 21.5(2)            | 0.874(6)               |                     | 326.2          | 60.3(5)            | 9.19(7)                |
|                                                      | 328.2          | 17.8(2)            | 0.593(4)               |                     | 328.2          | 38.4(2)            | 3.95(1)                |
|                                                      | 330.2          | 15.5(2)            | 0.478(3)               |                     | 330.2          | 30.2(2)            | 2.45(9)                |
|                                                      | 333.2          | 13.9(2)            | 0.369(3)               |                     | 333.2          | 23.7(1)            | 1.51(5)                |
|                                                      | 338.2          | 11.7(2)            | 0.280(3)               |                     | 338.2          | 17.9(1)            | 0.878(3)               |
|                                                      | 343.2          | 10.6(2)            | 0.241(2)               |                     | 343.2          | 15.4(1)            | 0.654(3)               |
| 0.876                                                | 324.2          | 127.7(21)          | 28.0(6)                | 0.930               | 323.2          | 82.1(5)            | 15.52(9)               |
|                                                      | 325.2          | 78.3(6)            | 12.3(1)                |                     | 324.2          | 67.1(4)            | 11.24(7)               |
|                                                      | 326.2          | 53.8(4)            | 5.98(4)                |                     | 326.2          | 39.7(3)            | 4.17(3)                |
|                                                      | 328.2          | 36.1(2)            | 2.81(1)                |                     | 328.2          | 30.5(2)            | 2.49(1)                |
|                                                      | 330.2          | 29.0(2)            | 1.793(8)               |                     | 330.2          | 25.5(1)            | 1.768(5)               |
|                                                      | 333.2          | 22.5(1)            | 1.122(3)               |                     | 333.2          | 21.4(2)            | 1.247(7)               |
|                                                      | 338.2          | 17.8(2)            | 0.689(4)               |                     | 338.2          | 17.7(1)            | 0.875(3)               |
|                                                      | 343.2          | 14.8(2)            | 0.514(3)               |                     | 343.2          | 15.1(1)            | 0.652(3)               |

<sup>a</sup> The values in the parentheses are the estimated standard deviation  $\sigma$  of the last figure.

### S3.3 Mechanism of phase separation from SANS measurements

To discuss the mechanism of phase separation of the  $[C_n\text{mim}][\text{TFSI}]\text{--FA-}d_2$  solutions at various  $x_{\text{FA-}d_2}$  examined, firstly, the spinodal temperatures  $T_s$  were tentatively estimated from the  $I_0$  and  $\xi$  values obtained from the SANS profiles through the following equations,

$$I_0^{-1} = C_1 \left| \frac{T - T_s}{T_s} \right|^\gamma, \quad (\text{S1})$$

$$\xi^{-1} = C_2 \left| \frac{T - T_s}{T_s} \right|^\nu, \quad (\text{S2})$$

where  $C_1$  and  $C_2$  are constant values,  $(T - T_s)/T_s$  is the normalized temperature, and  $\gamma$  and  $\nu$  are the critical exponents. Tentatively,  $\gamma$  and  $\nu$  values were fixed using typical values for 3D-Ising ( $\gamma = 1.24$  and  $\nu = 0.63$ ) or mean field ( $\gamma = 1.00$  and  $\nu = 0.50$ ). Then,  $T_s$  values were estimated from fits for the plots of  $I_0^{-1}$  and  $\xi^{-1}$  against temperature using eqns (S1) and (S2), respectively, as shown in Fig. S28–S36. For cautious estimations, two temperature  $T$  ranges were employed because  $T_s$  is the key value to assign the mechanism of phase separation; the whole  $T$  range examined and the partial one near the phase separation temperature. The sum of squared errors of the fits for the  $[C_6\text{mim}][\text{TFSI}]\text{--FA-}d_2$  and  $[C_8\text{mim}][\text{TFSI}]\text{--FA-}d_2$  systems in the whole and partial  $T$  ranges are summarized in Tables S9 and S10, respectively.

For the  $[C_6\text{mim}][\text{TFSI}]\text{--FA-}d_2$  system, as shown in Fig. S28–S32 and Table S9, the sums of squared errors at both sides of the UCST  $x_{\text{FA-}d_2}$  ( $x_{\text{FA-}d_2} = 0.881$ ) in the whole and partial  $T$  ranges for the mean field model are significantly smaller than those for the 3D-Ising model. On the other hand, the values at the UCST  $x_{\text{FA-}d_2}$  in both  $T$  ranges for the 3D-Ising are smaller compared to those for the mean field, except for the  $\xi^{-1}$  values in the whole  $T$  range. These results suggest that phase separation of the  $[C_6\text{mim}][\text{TFSI}]\text{--FA-}d_2$  solution only at the UCST  $x_{\text{FA-}d_2}$  occurs in the 3D-Ising mechanism, while that at the other mole fractions in the mean field one.

For the  $[C_8\text{mim}][\text{TFSI}]\text{--FA-}d_2$  system, the fits and their sums of squared errors are compared in Fig. S33–S36 and Table S10. In the whole  $T$  range, the sums of squared errors for both  $I_0^{-1}$

and  $\xi^{-1}$  values at  $x_{\text{FA-}d2} = 0.830$ , which is far from the UCST  $x_{\text{FA-}d2}$ , for the mean field model are smaller than those for the 3D-Ising model. The fits on the  $\xi^{-1}$  values at  $x_{\text{FA-}d2} = 0.900, 0.876$ , and  $0.930$ , which are the UCST  $x_{\text{FA-}d2}$  and its both sides, respectively, in the whole  $T$  range reveal the 3D-Ising mechanism. In contrast, the sums of squared errors for the  $I_0^{-1}$  values at the mole fractions in the whole  $T$  range suggest the mean field mechanism. The errors for both  $I_0^{-1}$  and  $\xi^{-1}$  values at all  $x_{\text{FA-}d2}$  in the partial  $T$  range for the 3D-Ising model are much smaller than those for the mean field. These ambiguities for the  $[\text{C}_8\text{mim}][\text{TFSI}]\text{-FA-}d2$  solutions around the UCST  $x_{\text{FA-}d2}$  imply that the enhancement of the microheterogeneity of the solutions upon cooling progresses in the mean field mechanism far from the phase separation temperature, but in the 3D-Ising mechanism near the temperature.

Using the  $T_s$  ( $T_{s \text{ 3D-Ising}}$  and  $T_{s \text{ mean field}}$ ) values estimated above (Tables S11–S14), the phase separation mechanisms for the  $[\text{C}_6\text{mim}][\text{TFSI}]\text{-}$  and  $[\text{C}_8\text{mim}][\text{TFSI}]\text{-FA-}d2$  systems were decided by following. The critical exponents of  $\gamma$  and  $\nu$  of phase separation for the solution at each  $x_{\text{FA-}d2}$  were determined from fits for the temperature dependence of  $I_0$  and  $\xi$  using equations,

$$I_0 = I_{\text{bare}} \left| \frac{T - T_s}{T_s} \right|^{-\gamma}, \quad (\text{S3})$$

$$\xi = \xi_{\text{bare}} \left| \frac{T - T_s}{T_s} \right|^{-\nu}, \quad (\text{S4})$$

where  $I_{\text{bare}}$  and  $\xi_{\text{bare}}$  are the bare  $I_0$  and  $\xi$ , respectively. The analyses of Cases 1 and 2 for both solutions were made using the  $T_{s \text{ 3D-Ising}}$  and  $T_{s \text{ mean field}}$  values for the whole  $T$  range, respectively. In contrast, those of Cases 3 and 4 were conducted using the values for the partial  $T$  range near the phase separation temperature, respectively.

The  $\gamma$  and  $\nu$  values estimated for the  $[\text{C}_6\text{mim}][\text{TFSI}]\text{-FA-}d2$  solutions in the whole and partial  $T$  ranges are summarized in Tables S11 and S12, respectively. In the tables, the differences between the critical exponent of  $\gamma$  or  $\nu$  and each typical value (1.24 and 0.63 for the 3D-Ising

and 1.00 and 0.50 for the mean field) are also given. The suitability of the phase separation mechanism with the smaller difference is described in the last column of the tables. According to the sums of squared errors for the estimation of  $T_s$  (Table S9) and the suitability (Tables S11 and S12), we can decide that phase separation of the  $[C_6mim][TFSI]-FA-d_2$  solutions at  $x_{FA-d_2} = 0.800, 0.920$ , and  $0.950$  takes place via the mean field mechanism. However, the suitability for the solution at the UCST  $x_{FA-d_2}$  of  $0.881$  and its neighbor of  $0.840$  for the whole  $T$  range (Table S11) suggests the mean field mechanism, whereas that for the partial  $T$  range (Table S12) reveals the 3D-Ising mechanism, as depicted in *the Italic characters* in the tables. In such case, we give the priority to the candidate for the partial  $T$  range near each phase separation temperature. Therefore, phase separation of the solutions at the UCST  $x_{FA-d_2}$  and its vicinity occurs via the 3D-Ising mechanism.

The critical exponents of  $\gamma$  and  $\nu$  and the differences for the  $[C_8mim][TFSI]-FA-d_2$  solutions for the whole and partial  $T$  ranges are summarized in Tables S13 and S14, respectively. The suitability of the solutions at the UCST  $x_{FA-d_2}$  of  $0.900$  and its both sides of  $0.876$  and  $0.930$  gives the 3D-Ising mechanism. This is consistent with the candidate from the estimation for  $T_s$  values in the partial  $T$  range (Table S10), although the fits for the  $I_0^{-1}$  values in the whole range suggest the mean field. Thus, we conclude the 3D-Ising for the phase separation mechanism of the three solutions around the UCST  $x_{FA-d_2}$ . On the other hand, the suitability of the solution at  $x_{FA-d_2} = 0.830$  in the whole  $T$  range reveals the mean field, while that in the partial  $T$  range shows the 3D-Ising. According to the priority for the partial  $T$  range as the above, we decide the 3D-Ising mechanism for the solution at  $x_{FA-d_2} = 0.830$ . Therefore, phase separation of the  $[C_8mim][TFSI]-FA-d_2$  solutions at all the mole fractions examined occurs via the 3D-Ising mechanism.

For the present  $[C_nmim][TFSI]-FA-d_2$  solutions, the temperature range dependence of the suitability for the phase separation mechanisms is found, unlike the previous



[C<sub>8</sub>mim][TFSI]–1,4-DIO-*d*<sub>8</sub> solutions. It is likely that the crossover of the mechanism for the enhancement of heterogeneity from the mean field to the 3D-Ising occurs for the FA solutions against temperature due to the strong self-hydrogen bonding among FA.

The final decision for the mechanism of the [C<sub>6</sub>mim][TFSI]–FA-*d*<sub>2</sub> and [C<sub>8</sub>mim][TFSI]–FA-*d*<sub>2</sub> solutions, together with the final  $T_s$  values and the critical exponents of  $\gamma$  and  $\nu$ , are summarized in Table 2 of the main text. To reconfirm the mechanism concluded for each solution, the  $I_0$  and  $\xi$  values were plotted as a function of  $(T - T_s)/T_s$  using the final  $T_s$  in Fig. S37. This figure proves the validities of all the classification for the phase separation mechanisms.

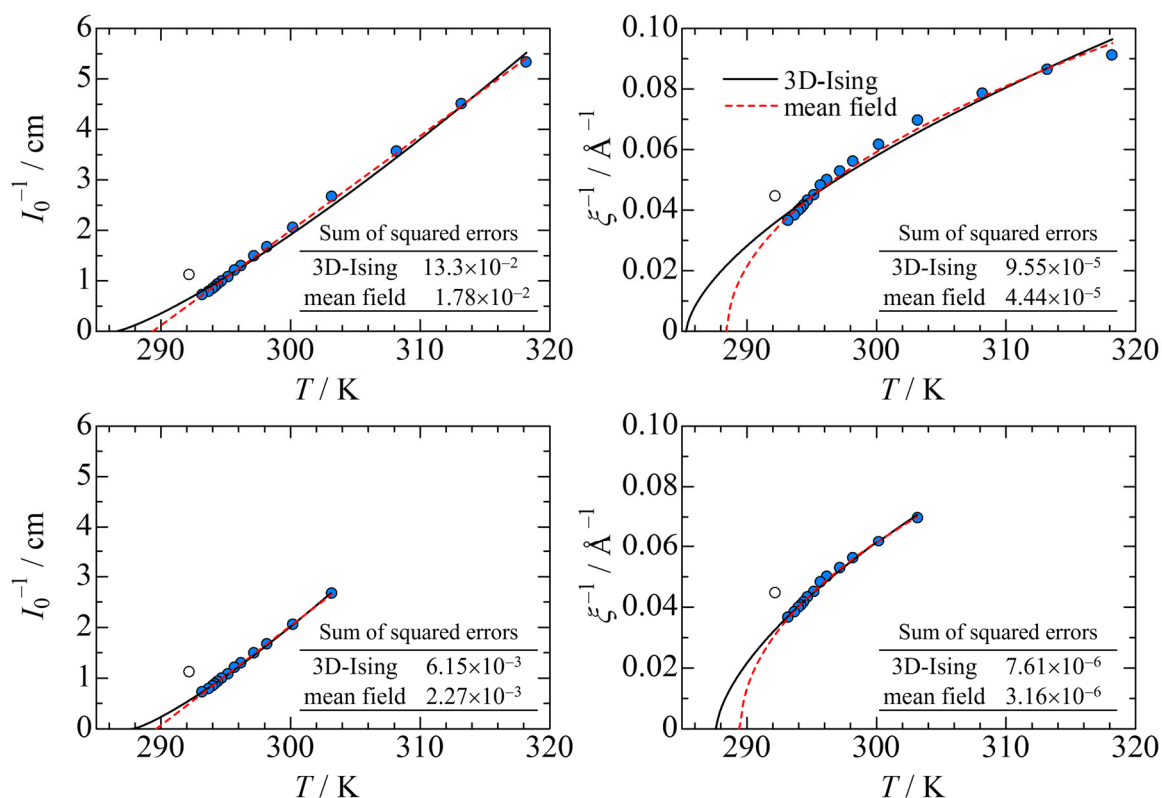

Fig. S28 Fitting for  $I_0^{-1}$  and  $\xi^{-1}$  values of [C<sub>6</sub>mim][TFSI]–FA-*d*<sub>2</sub> solution at  $x_{\text{FA-d2}} = 0.800$  against  $T$  in the whole range examined (upper) and the partial range near phase separation temperature (bottom). Solid and dashed lines show the results of fits with the assumption of 3D-Ising and mean field models, respectively, using eqns (S1) and (S2). White circles give the values estimated from SANS profiles for the sample solution after phase separation and were not used for the fits to determine  $T_s$ . The sums of squared errors of the fits by eqns (S1) and (S2) are inserted in the figures.

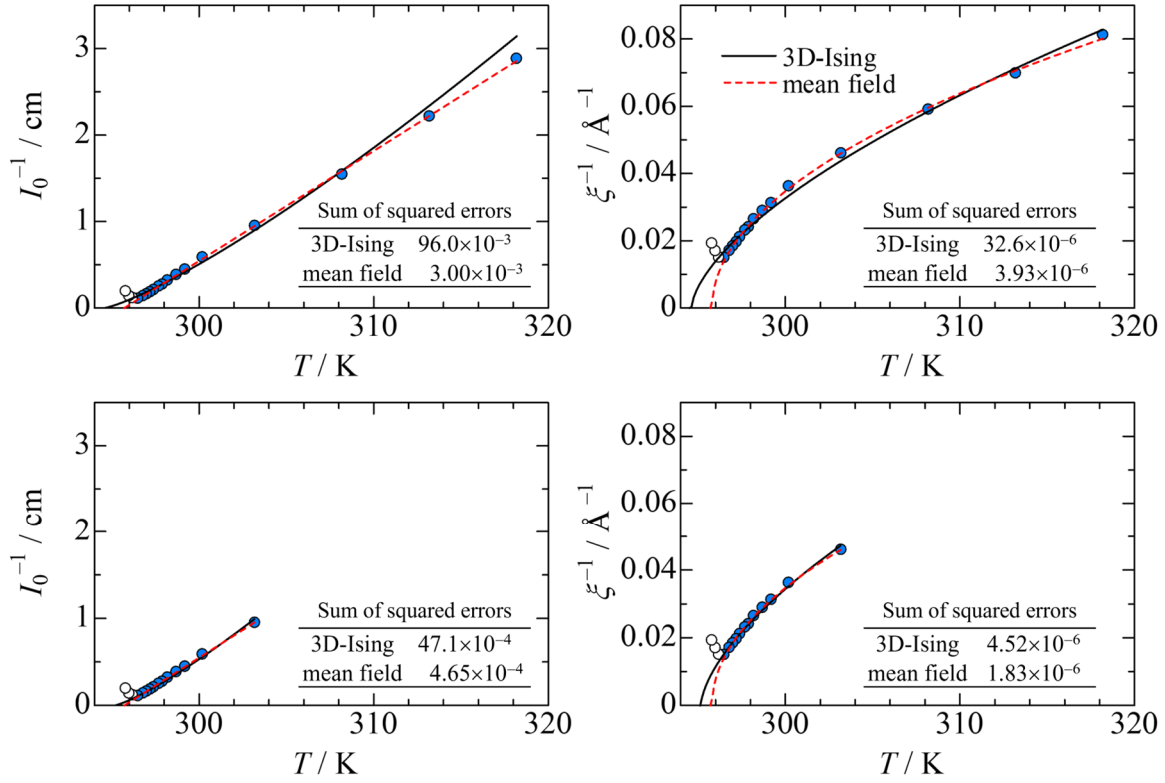

Fig. S29 Fitting for  $I_0^{-1}$  and  $\xi^{-1}$  values of  $[C_6mim][TFSI]-FA-d_2$  solution at  $x_{FA-d_2} = 0.840$  against  $T$  in the whole range examined (upper) and the partial range near phase separation temperature (bottom). The types of lines and circles are the same as those in Fig. S28.

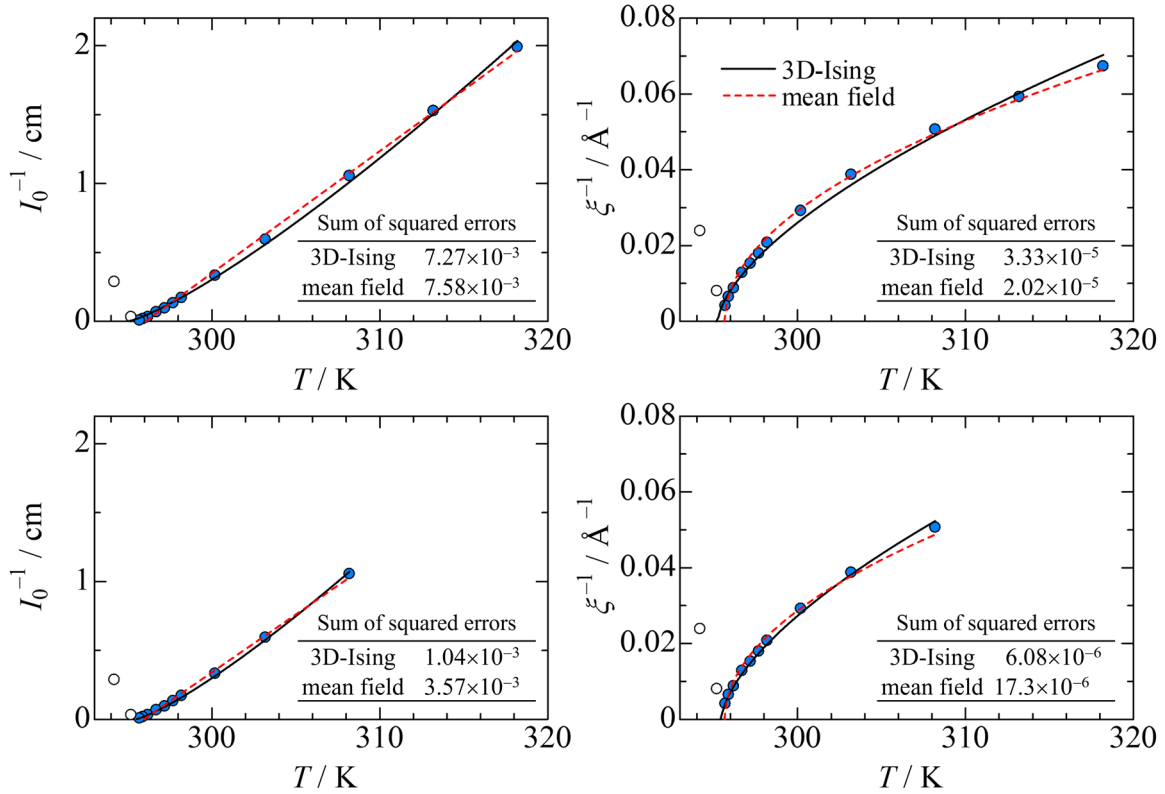

Fig. S30 Fitting for  $I_0^{-1}$  and  $\xi^{-1}$  values of  $[C_6mim][TFSI]-FA-d_2$  solution at  $x_{FA-d_2} = 0.881$  against  $T$  in the whole range examined (upper) and the partial range near phase separation temperature (bottom). The types of lines and circles are the same as those in Fig. S28.

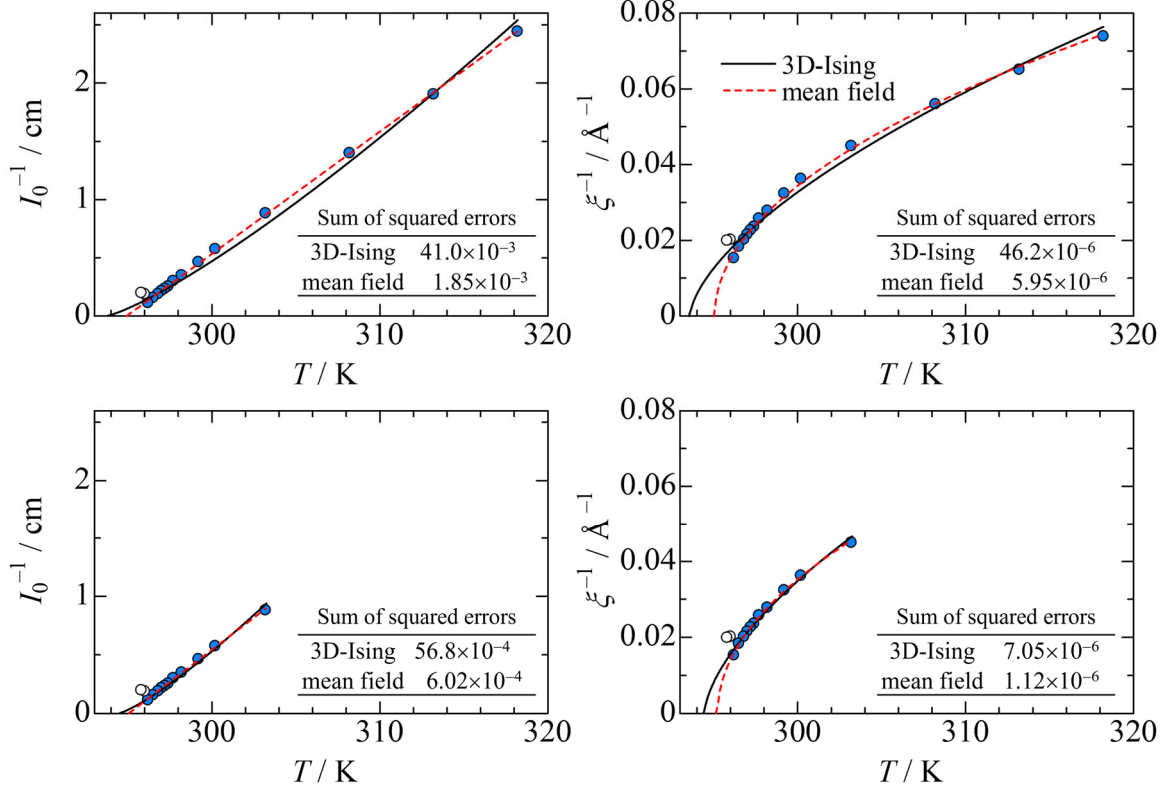

Fig. S31 Fitting for  $I_0^{-1}$  and  $\xi^{-1}$  values of [C6mim][TFSI]-FA- $d_2$  solution at  $x_{\text{FA-}d_2} = 0.920$  against  $T$  in the whole range examined (upper) and the partial range near phase separation temperature (bottom). The types of lines and circles are the same as those in Fig. S28.

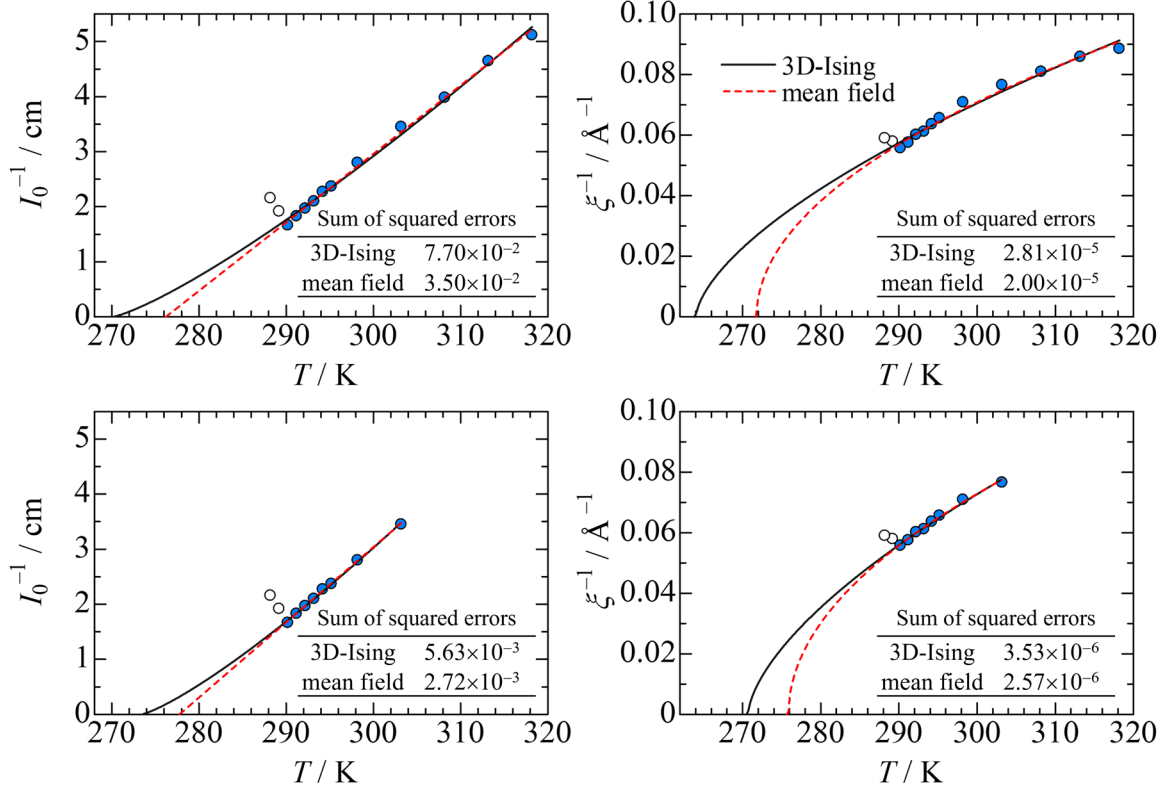

Fig. S32 Fitting for  $I_0^{-1}$  and  $\xi^{-1}$  values of [C6mim][TFSI]-FA- $d_2$  solution at  $x_{\text{FA-}d_2} = 0.950$  against  $T$  in the whole range examined (upper) and the partial range near phase separation temperature (bottom). The types of lines and circles are the same as those in Fig. S28.

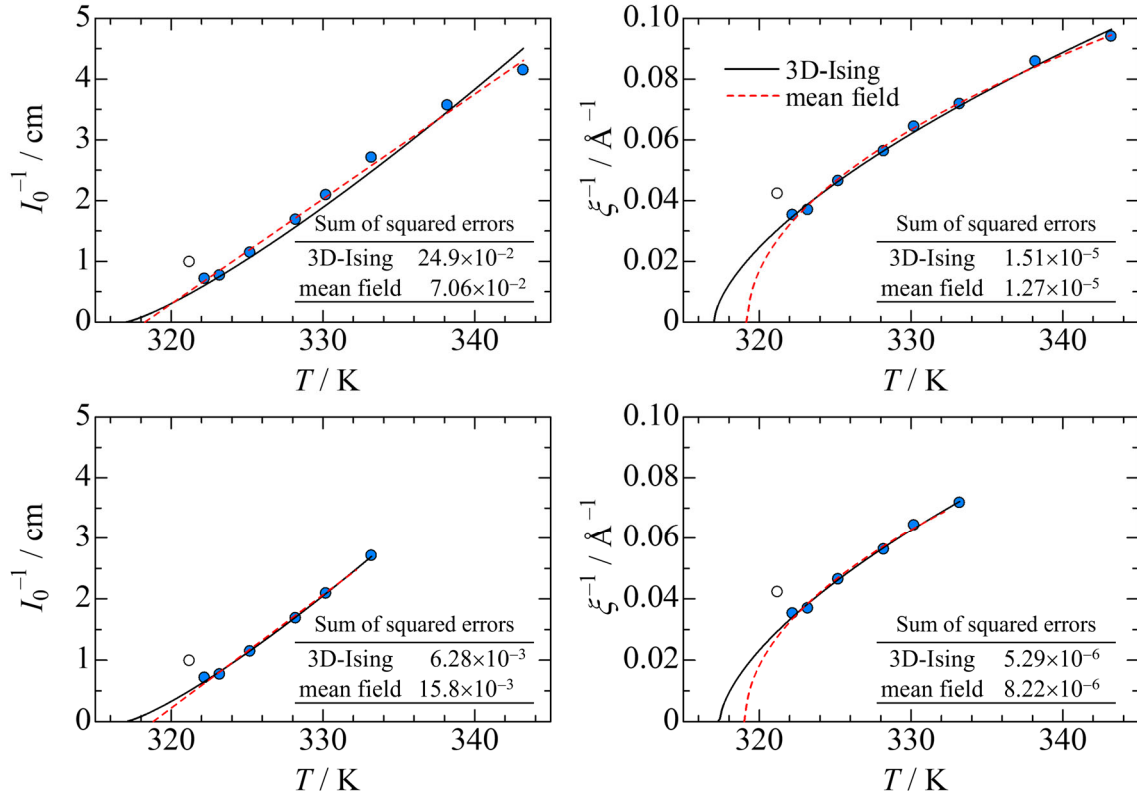

Fig. S33 Fitting for  $I_0^{-1}$  and  $\xi^{-1}$  values of  $[C_8mim][TFSI]-FA-d_2$  solution at  $x_{FA-d_2} = 0.830$  against  $T$  in the whole range examined (upper) and the partial range near phase separation temperature (bottom). The types of lines and circles are the same as those in Fig. S28.

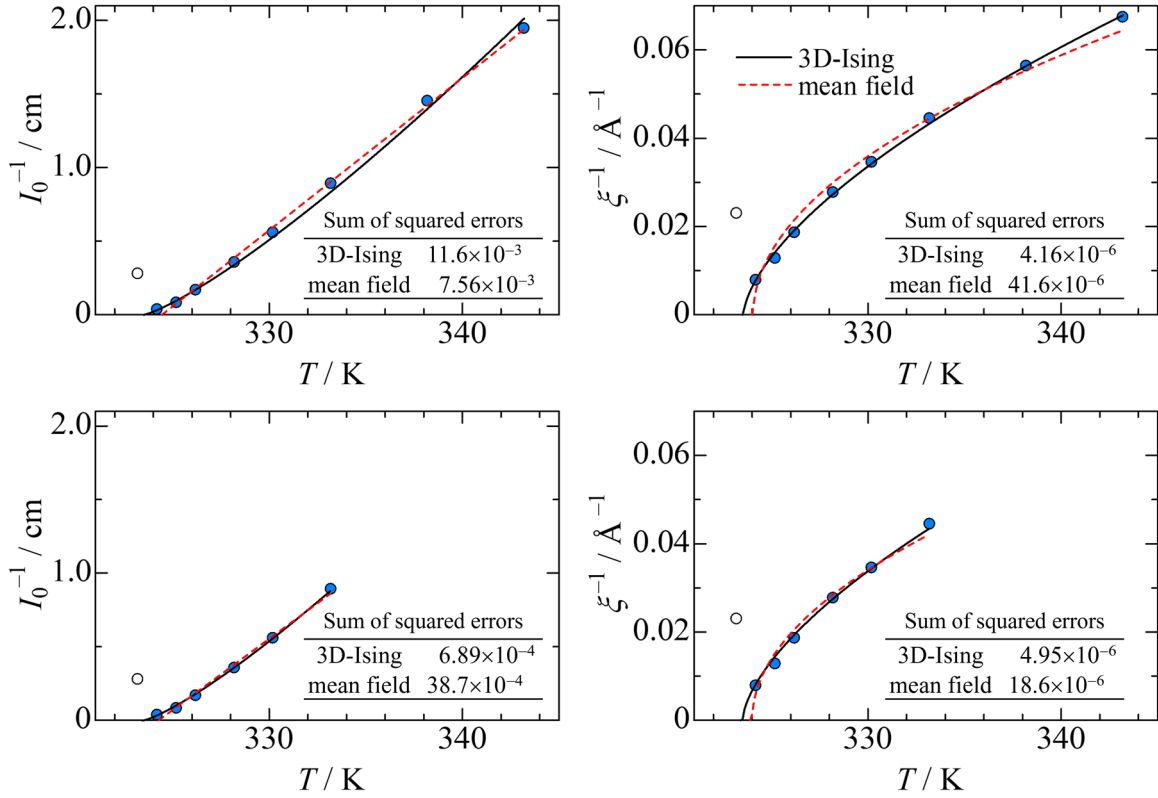

Fig. S34 Fitting for  $I_0^{-1}$  and  $\xi^{-1}$  values of  $[C_8mim][TFSI]-FA-d_2$  solution at  $x_{FA-d_2} = 0.876$  against  $T$  in the whole range examined (upper) and the partial range near phase separation temperature (bottom). The types of lines and circles are the same as those in Fig. S28.

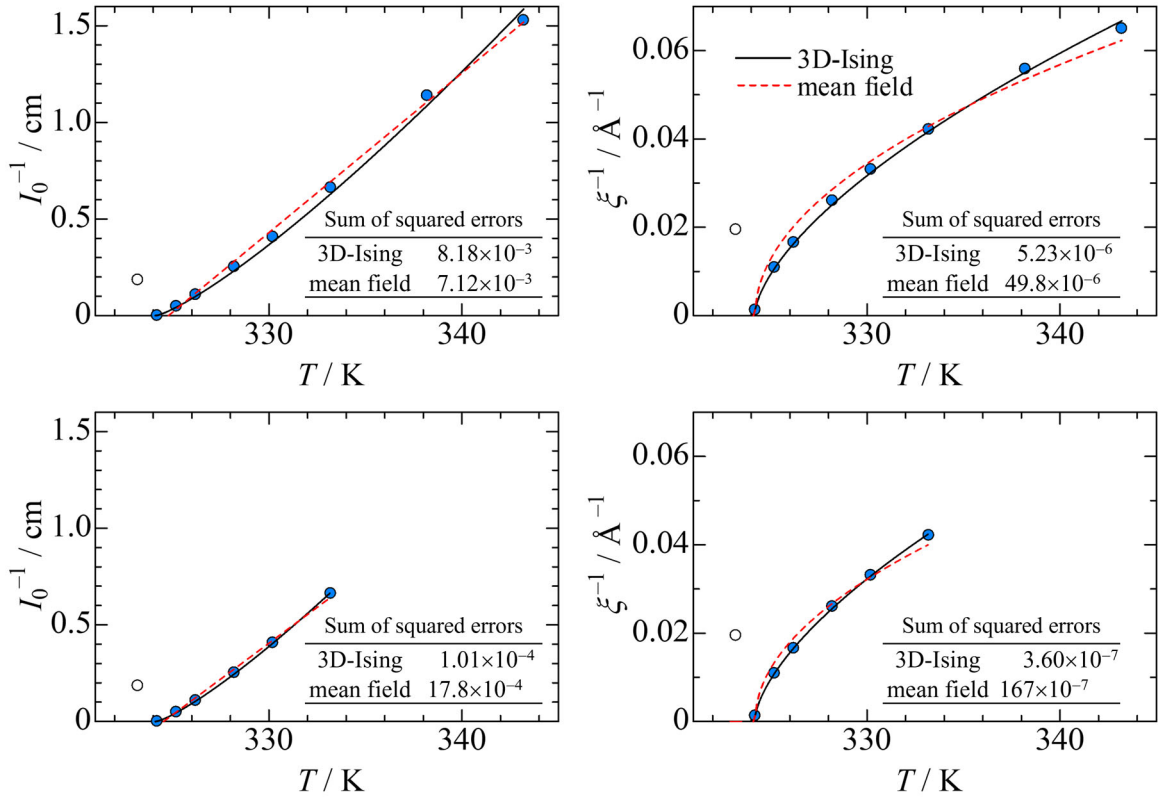

Fig. S35 Fitting for  $I_0^{-1}$  and  $\xi^{-1}$  values of [C8mim][TFSI]-FA- $d_2$  solution at  $x_{\text{FA-}d_2} = 0.900$  against  $T$  in the whole range examined (upper) and the partial range near phase separation temperature (bottom). The types of lines and circles are the same as those in Fig. S28.

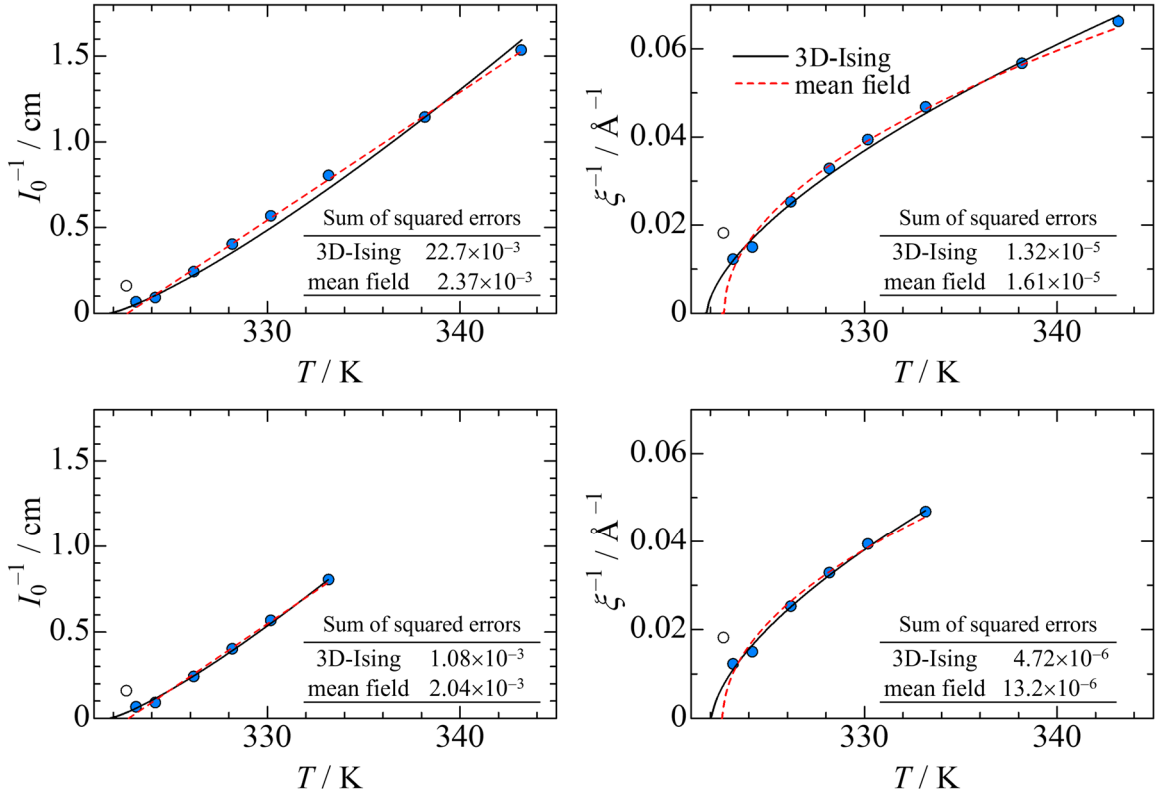

Fig. S36 Fitting for  $I_0^{-1}$  and  $\xi^{-1}$  values of [C8mim][TFSI]-FA- $d_2$  solution at  $x_{\text{FA-}d_2} = 0.930$  against  $T$  in the whole range examined (upper) and the partial range near phase separation temperature (bottom). The types of lines and circles are the same as those in Fig. S28.

Table S9 Sum of squared errors of the  $T_s$  fits of [C<sub>6</sub>mim][TFSI]–FA- $d_2$  solutions at various  $x_{\text{FA-}d_2}$ , respectively, with  $T_s$  estimated from the whole and partial  $T$  ranges of Fig. S28–S32.

| Sum of squared errors for whole $T$ range   |                       |                       |                       |                       |
|---------------------------------------------|-----------------------|-----------------------|-----------------------|-----------------------|
| $x_{\text{FA-}d_2}$                         | $I_0^{-1}$            |                       | $\xi^{-1}$            |                       |
|                                             | 3D-Ising              | mean field            | 3D-Ising              | mean field            |
| 0.800                                       | $13.3 \times 10^{-2}$ | $1.78 \times 10^{-2}$ | $9.55 \times 10^{-5}$ | $4.44 \times 10^{-5}$ |
| 0.840                                       | $96.0 \times 10^{-3}$ | $3.00 \times 10^{-3}$ | $32.6 \times 10^{-6}$ | $3.93 \times 10^{-6}$ |
| 0.881*                                      | $7.27 \times 10^{-3}$ | $7.58 \times 10^{-3}$ | $3.33 \times 10^{-5}$ | $2.02 \times 10^{-5}$ |
| 0.920                                       | $41.0 \times 10^{-3}$ | $1.85 \times 10^{-3}$ | $46.2 \times 10^{-6}$ | $5.95 \times 10^{-6}$ |
| 0.950                                       | $7.70 \times 10^{-2}$ | $3.50 \times 10^{-2}$ | $2.81 \times 10^{-5}$ | $2.00 \times 10^{-5}$ |
| Sum of squared errors for partial $T$ range |                       |                       |                       |                       |
| $x_{\text{FA-}d_2}$                         | $I_0^{-1}$            |                       | $\xi^{-1}$            |                       |
|                                             | 3D-Ising              | mean field            | 3D-Ising              | mean field            |
| 0.800                                       | $6.15 \times 10^{-3}$ | $2.27 \times 10^{-3}$ | $7.61 \times 10^{-6}$ | $3.16 \times 10^{-6}$ |
| 0.840                                       | $47.1 \times 10^{-4}$ | $4.65 \times 10^{-4}$ | $4.52 \times 10^{-6}$ | $1.83 \times 10^{-6}$ |
| 0.881*                                      | $1.04 \times 10^{-3}$ | $3.57 \times 10^{-3}$ | $6.08 \times 10^{-6}$ | $17.3 \times 10^{-6}$ |
| 0.920                                       | $56.8 \times 10^{-4}$ | $6.02 \times 10^{-4}$ | $7.05 \times 10^{-6}$ | $1.12 \times 10^{-6}$ |
| 0.950                                       | $5.63 \times 10^{-3}$ | $2.72 \times 10^{-3}$ | $3.53 \times 10^{-6}$ | $2.57 \times 10^{-6}$ |

\* $x_{\text{FA-}d_2}$  of the UCST composition.

Table S10 Sum of squared errors of the  $T_s$  fits of [C<sub>8</sub>mim][TFSI]–FA- $d_2$  solutions at various  $x_{\text{FA-}d_2}$ , respectively, with  $T_s$  estimated from the whole and partial  $T$  ranges of Fig. S33–S36.

| Sum of squared errors for whole $T$ range   |                       |                       |                       |                       |
|---------------------------------------------|-----------------------|-----------------------|-----------------------|-----------------------|
| $x_{\text{FA-}d_2}$                         | $I_0^{-1}$            |                       | $\xi^{-1}$            |                       |
|                                             | 3D-Ising              | mean field            | 3D-Ising              | mean field            |
| 0.830                                       | $24.9 \times 10^{-2}$ | $7.06 \times 10^{-2}$ | $1.51 \times 10^{-5}$ | $1.27 \times 10^{-5}$ |
| 0.876                                       | $11.6 \times 10^{-3}$ | $7.56 \times 10^{-3}$ | $4.16 \times 10^{-6}$ | $41.6 \times 10^{-6}$ |
| 0.900*                                      | $8.18 \times 10^{-3}$ | $7.12 \times 10^{-3}$ | $5.23 \times 10^{-6}$ | $49.8 \times 10^{-6}$ |
| 0.930                                       | $22.7 \times 10^{-3}$ | $2.37 \times 10^{-3}$ | $1.32 \times 10^{-5}$ | $1.61 \times 10^{-5}$ |
| Sum of squared errors for partial $T$ range |                       |                       |                       |                       |
| $x_{\text{FA-}d_2}$                         | $I_0^{-1}$            |                       | $\xi^{-1}$            |                       |
|                                             | 3D-Ising              | mean field            | 3D-Ising              | mean field            |
| 0.830                                       | $6.28 \times 10^{-3}$ | $15.8 \times 10^{-3}$ | $5.29 \times 10^{-6}$ | $8.22 \times 10^{-6}$ |
| 0.876                                       | $6.89 \times 10^{-4}$ | $38.7 \times 10^{-4}$ | $4.95 \times 10^{-6}$ | $18.6 \times 10^{-6}$ |
| 0.900*                                      | $1.01 \times 10^{-4}$ | $17.8 \times 10^{-4}$ | $3.60 \times 10^{-7}$ | $167 \times 10^{-7}$  |
| 0.930                                       | $1.08 \times 10^{-3}$ | $2.04 \times 10^{-3}$ | $4.72 \times 10^{-6}$ | $13.2 \times 10^{-6}$ |

\* $x_{\text{FA-}d_2}$  of the UCST composition.

Table S11 Critical exponents of  $\gamma$  and  $\nu$  determined from fits on  $I_0$  and  $\xi$  values of [C<sub>6</sub>mim][TFSI]–FA- $d_2$  solutions at various  $x_{\text{FA-}d_2}$ , respectively, with  $T_s$  estimated from the whole  $T$  range of Fig. S28–S32. Differences give the values between the estimated critical exponents and the typical ones of  $\gamma$  (1.24 and 1.00) and  $\nu$  (0.63 and 0.50). Suitability refers to which model better explains the  $I_0$  and  $\xi$  values when comparing the results of Cases 1 and 2. The description of the model's name indicates the better explanation.

| Case 1: $T_s$ values estimated by assuming 3D-Ising model were used.   |               |                      |          |                      |       |                      |             |
|------------------------------------------------------------------------|---------------|----------------------|----------|----------------------|-------|----------------------|-------------|
| $x_{\text{FA-}d_2}$                                                    | $T$ range / K | $T_s$ 3D-Ising / K   | $\gamma$ | Difference from 1.24 | $\nu$ | Difference from 0.63 | Suitability |
| 0.800                                                                  | 293.2–318.2   | 285.9                | 1.45     | 0.21                 | 0.65  | 0.02                 |             |
| 0.840                                                                  | 296.2–318.2   | 294.6                | 1.45     | 0.21                 | 0.69  | 0.06                 |             |
| 0.881*                                                                 | 295.7–318.2   | 295.1                | 1.56     | 0.32                 | 0.84  | 0.21                 |             |
| 0.920                                                                  | 296.2–318.2   | 293.7                | 1.47     | 0.23                 | 0.69  | 0.06                 |             |
| 0.950                                                                  | 290.2–318.2   | 267.1                | 1.44     | 0.20                 | 0.60  | -0.03                |             |
| Case 2: $T_s$ values estimated by assuming mean field model were used. |               |                      |          |                      |       |                      |             |
| $x_{\text{FA-}d_2}$                                                    | $T$ range / K | $T_s$ mean field / K | $\gamma$ | Difference from 1.00 | $\nu$ | Difference from 0.50 | Suitability |
| 0.800                                                                  | 293.2–318.2   | 288.9                | 1.08     | 0.08                 | 0.50  | 0.00                 | mean field  |
| 0.840                                                                  | 296.2–318.2   | 295.8                | 0.93     | -0.07                | 0.49  | -0.01                | mean field  |
| 0.881*                                                                 | 295.7–318.2   | 295.9                | 0.90     | -0.10                | 0.47  | -0.03                | mean field  |
| 0.920                                                                  | 296.2–318.2   | 295.0                | 1.05     | 0.05                 | 0.53  | 0.03                 | mean field  |
| 0.950                                                                  | 290.2–318.2   | 274.0                | 1.13     | 0.13                 | 0.47  | -0.03                | mean field  |

\* $x_{\text{FA-}d_2}$  of the UCST composition.

Table S12 Critical exponents of  $\gamma$  and  $\nu$  determined from fits on  $I_0$  and  $\xi$  values of [C<sub>6</sub>mim][TFSI]–FA- $d_2$  solutions at various  $x_{\text{FA-}d_2}$ , respectively, with  $T_s$  estimated from the partial  $T$  range of Fig. S28–S32. Differences give the values between the estimated critical exponents and the typical ones of  $\gamma$  (1.24 and 1.00) and  $\nu$  (0.63 and 0.50). Suitability refers to which model better explains the  $I_0$  and  $\xi$  values when comparing the results of Cases 3 and 4. The description of the model's name indicates the better explanation.

| Case 3: $T_s$ values estimated by assuming 3D-Ising model were used.   |               |                      |          |                      |       |                      |             |
|------------------------------------------------------------------------|---------------|----------------------|----------|----------------------|-------|----------------------|-------------|
| $x_{\text{FA-}d_2}$                                                    | $T$ range / K | $T_s$ 3D-Ising / K   | $\gamma$ | Difference from 1.24 | $\nu$ | Difference from 0.63 | Suitability |
| 0.800                                                                  | 293.2–303.2   | 287.8                | 1.29     | 0.05                 | 0.64  | 0.01                 |             |
| 0.840                                                                  | 296.2–303.2   | 295.2                | 1.25     | 0.01                 | 0.65  | 0.02                 | 3D-Ising    |
| 0.881*                                                                 | 295.7–308.2   | 295.5                | 1.22     | -0.02                | 0.61  | -0.02                | 3D-Ising    |
| 0.920                                                                  | 296.2–303.2   | 294.5                | 1.32     | 0.08                 | 0.67  | 0.04                 |             |
| 0.950                                                                  | 290.2–303.2   | 272.1                | 1.35     | 0.11                 | 0.61  | -0.02                |             |
| Case 4: $T_s$ values estimated by assuming mean field model were used. |               |                      |          |                      |       |                      |             |
| $x_{\text{FA-}d_2}$                                                    | $T$ range / K | $T_s$ mean field / K | $\gamma$ | Difference from 1.00 | $\nu$ | Difference from 0.50 | Suitability |
| 0.800                                                                  | 293.2–303.2   | 289.6                | 1.00     | 0.00                 | 0.50  | 0.00                 | mean field  |
| 0.840                                                                  | 296.2–303.2   | 296.3                | 0.91     | -0.09                | 0.49  | -0.01                |             |
| 0.881*                                                                 | 295.7–308.2   | 295.8                | 0.74     | -0.26                | 0.40  | -0.10                |             |
| 0.920                                                                  | 296.2–303.2   | 295.1                | 1.04     | 0.04                 | 0.54  | 0.04                 | mean field  |
| 0.950                                                                  | 290.2–303.2   | 276.8                | 1.07     | 0.07                 | 0.48  | -0.02                | mean field  |

\* $x_{\text{FA-}d_2}$  of the UCST composition.

Table S13 Critical exponents of  $\gamma$  and  $\nu$  determined from fits on  $I_0$  and  $\xi$  values of [C<sub>8</sub>mim][TFSI]–FA- $d_2$  solutions at various  $x_{\text{FA-}d_2}$ , respectively, with  $T_s$  estimated from the whole  $T$  range of Fig. S33–S36. Differences give the values between the estimated critical exponents and the typical ones of  $\gamma$  (1.24 and 1.00) and  $\nu$  (0.63 and 0.50). Suitability refers to which model better explains the  $I_0$  and  $\xi$  values when comparing the results of Cases 1 and 2. The description of the model's name indicates the better explanation.

| Case 1: $T_s$ values estimated by assuming 3D-Ising model were used.   |               |                      |          |                      |       |                      |                   |
|------------------------------------------------------------------------|---------------|----------------------|----------|----------------------|-------|----------------------|-------------------|
| $x_{\text{FA-}d_2}$                                                    | $T$ range / K | $T_s$ 3D-Ising / K   | $\gamma$ | Difference from 1.24 | $\nu$ | Difference from 0.63 | Suitability       |
| 0.830                                                                  | 322.2–343.2   | 317.0                | 1.17     | -0.07                | 0.64  | 0.01                 |                   |
| 0.876                                                                  | 324.2–343.2   | 323.5                | 1.19     | -0.05                | 0.66  | 0.03                 | 3D-Ising          |
| 0.900*                                                                 | 324.2–343.2   | 324.2                | 1.19     | -0.05                | 0.62  | -0.01                | 3D-Ising          |
| 0.930                                                                  | 323.2–343.2   | 321.8                | 1.20     | -0.04                | 0.65  | 0.02                 | 3D-Ising          |
| Case 2: $T_s$ values estimated by assuming mean field model were used. |               |                      |          |                      |       |                      |                   |
| $x_{\text{FA-}d_2}$                                                    | $T$ range / K | $T_s$ mean field / K | $\gamma$ | Difference from 1.00 | $\nu$ | Difference from 0.50 | Suitability       |
| 0.830                                                                  | 322.2–343.2   | 318.7                | 0.95     | -0.05                | 0.53  | 0.03                 | <i>mean field</i> |
| 0.876                                                                  | 324.2–343.2   | 324.3                | 1.03     | 0.03                 | 0.54  | 0.04                 |                   |
| 0.900*                                                                 | 324.2–343.2   | 324.5                | 1.03     | 0.03                 | 0.54  | 0.04                 |                   |
| 0.930                                                                  | 323.2–343.2   | 322.7                | 0.80     | -0.20                | 0.45  | -0.05                |                   |

\* $x_{\text{FA-}d_2}$  of the UCST composition.

Table S14 Critical exponents of  $\gamma$  and  $\nu$  determined from fits on  $I_0$  and  $\xi$  values of [C<sub>8</sub>mim][TFSI]–FA- $d_2$  solutions at various  $x_{\text{FA-}d_2}$ , respectively, with  $T_s$  estimated from the partial  $T$  range of Fig. S33–S36. Differences give the values between the estimated critical exponents and the typical ones of  $\gamma$  (1.24 and 1.00) and  $\nu$  (0.63 and 0.50). Suitability refers to which model better explains the  $I_0$  and  $\xi$  values when comparing the results of Cases 3 and 4. The description of the model's name indicates the better explanation.

| Case 3: $T_s$ values estimated by assuming 3D-Ising model were used.   |               |                      |          |                      |       |                      |                 |
|------------------------------------------------------------------------|---------------|----------------------|----------|----------------------|-------|----------------------|-----------------|
| $x_{\text{FA-}d_2}$                                                    | $T$ range / K | $T_s$ 3D-Ising / K   | $\gamma$ | Difference from 1.24 | $\nu$ | Difference from 0.63 | Suitability     |
| 0.830                                                                  | 322.2–333.2   | 317.2                | 1.15     | -0.09                | 0.63  | 0.00                 | <i>3D-Ising</i> |
| 0.876                                                                  | 324.2–333.2   | 323.5                | 1.18     | -0.06                | 0.66  | 0.03                 | 3D-Ising        |
| 0.900*                                                                 | 324.2–333.2   | 324.2                | 1.19     | -0.05                | 0.61  | -0.02                | 3D-Ising        |
| 0.930                                                                  | 323.2–343.2   | 321.9                | 1.16     | -0.08                | 0.64  | 0.01                 | 3D-Ising        |
| Case 4: $T_s$ values estimated by assuming mean field model were used. |               |                      |          |                      |       |                      |                 |
| $x_{\text{FA-}d_2}$                                                    | $T$ range / K | $T_s$ mean field / K | $\gamma$ | Difference from 1.00 | $\nu$ | Difference from 0.50 | Suitability     |
| 0.830                                                                  | 322.2–333.2   | 319.0                | 0.89     | -0.11                | 0.49  | -0.01                |                 |
| 0.876                                                                  | 324.2–333.2   | 324.1                | 0.61     | -0.39                | 0.35  | -0.15                |                 |
| 0.900*                                                                 | 324.2–333.2   | 324.4                | 1.08     | 0.08                 | 0.57  | 0.07                 |                 |
| 0.930                                                                  | 323.2–333.2   | 322.7                | 0.77     | -0.23                | 0.43  | -0.07                |                 |

\* $x_{\text{FA-}d_2}$  of the UCST composition.



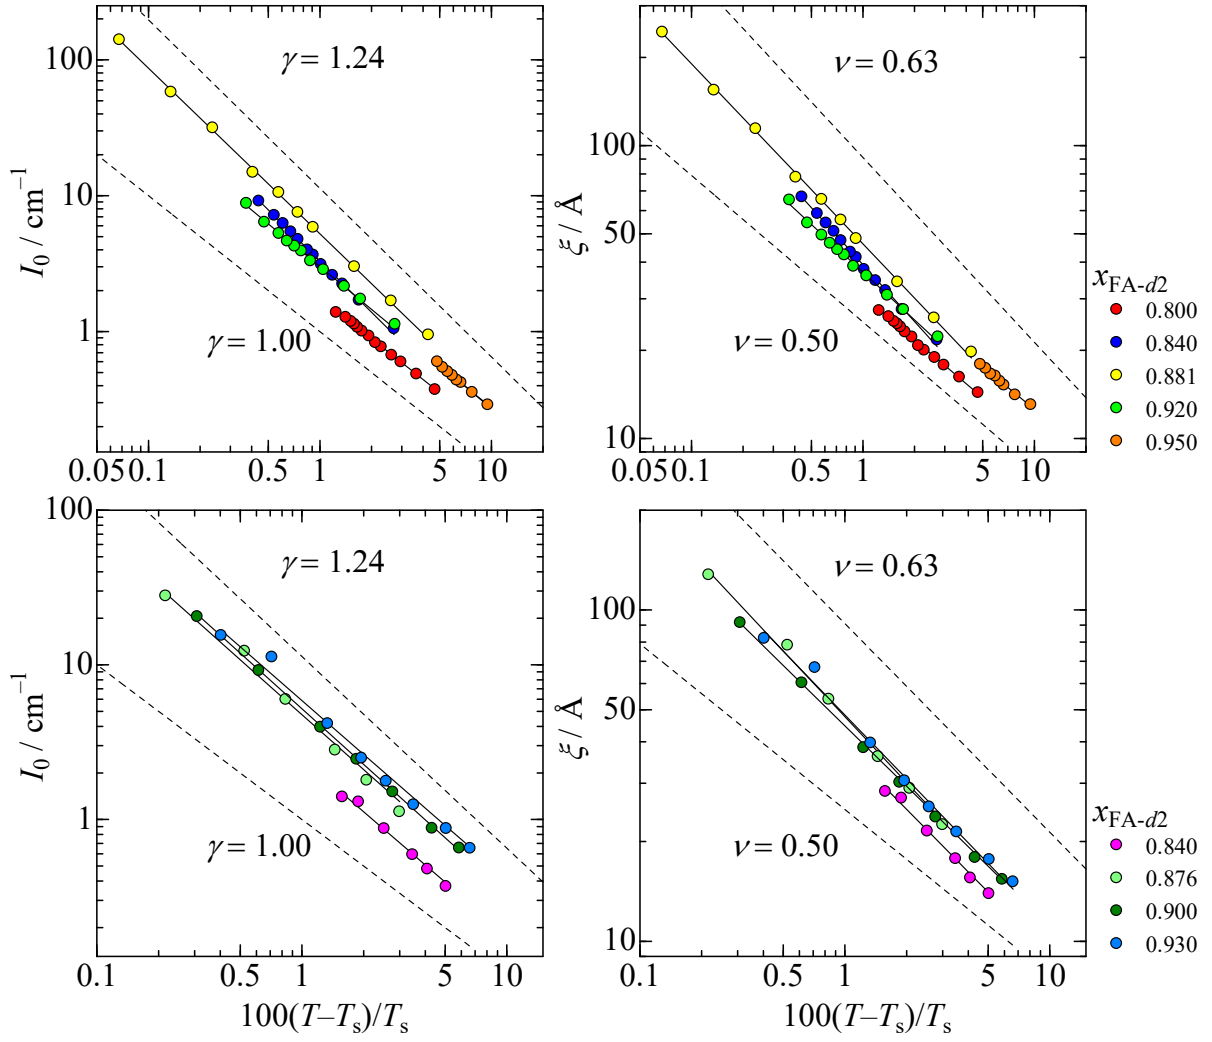

Fig. S37  $\gamma$  and  $\nu$  determined by fits for  $I_0$  and  $\xi$  values of [C<sub>6</sub>mim][TFSI]-FA-*d*<sub>2</sub> (top) and [C<sub>8</sub>mim][TFSI]-FA-*d*<sub>2</sub> (bottom) solutions at various  $x_{\text{FA-d}_2}$ . The dashed lines show the slopes of the typical  $\gamma$  (1.24 and 1.00, respectively) and  $\nu$  (0.63 and 0.50, respectively) values for 3D-Ising and mean field.
